# Supplementary material for: Investigation of the properties of 4,5-dialkylated N-heterocyclic carbenes
Source: Royal Society of Chemistry journal article supplement (doi:10.1039/b908981k), 2009-01-01
Supplement: b908981k2.pdf [file b908981k2.pdf]

# Investigation of the properties of 4,5-dialkylated N-heterocyclic carbenes

Slawomir Urban,<sup>a</sup> Matyas Tursky,<sup>ab</sup> Roland Fröhlich<sup>a</sup> and Frank Glorius\*<sup>a</sup>

<sup>a</sup> *Organisch-Chemisches Institut der Westfälischen Wilhelms-Universität Münster, Corrensstraße 40, 48149  
Münster, Germany*

<sup>b</sup> *Department of Chemistry, Technical University of Denmark, 2800 Kgs. Lyngby, Denmark*

## Electronic supplementary information (ESI)

### Table of Contents

|                                                                          |    |
|--------------------------------------------------------------------------|----|
| 1. General Informations                                                  | 2  |
| 2. Exchange of Anions and Characterization of Imidazolium Salts <b>6</b> | 3  |
| 3. Preparation and Characterization of Complexes <b>7</b>                | 9  |
| 4. Preparation and Characterization of Complexes <b>8</b>                | 15 |
| 5. Preparation of $\gamma$ -butyrolactones <b>11a</b> and <b>11b</b>     | 21 |
| 6. Calibration for GC yield determination of <b>11a</b> and <b>11b</b>   | 22 |
| 7. Single-crystal X-ray Analysis                                         | 26 |
| 8. Calculation of the Buried Volume using SambVa (Web Application)       | 42 |
| 9. References                                                            | 51 |

## 1. General Informations

Unless otherwise noted, all reactions were carried out under an atmosphere of argon in oven-dried glassware. Reaction temperatures are reported as the temperature of the bath surrounding the vessel unless otherwise stated. The solvents were purified by distillation over the drying agents indicated in parentheses and were transferred under Argon: THF (Na-benzophenone), CH<sub>2</sub>Cl<sub>2</sub> (CaH<sub>2</sub>).

Commercially available chemicals were obtained from Acros Organics, Aldrich Chemical Co., Strem Chemicals, Alfa Aesar, ABCR and TCI Europe and used as received unless otherwise stated. DBU (1,8-Diazabicyclo[5.4.0]undec-7-en) and *trans*-cinnamaldehyde were freshly distilled prior to use.

Analytical thin layer chromatography was performed on Polygram SIL G/UV<sub>254</sub> plates. Visualization was accomplished with short wave UV light, KMnO<sub>4</sub> or phosphomolybdic acid staining solutions followed by heating.

Flash chromatography was either performed on Merck silica gel (40-63 mesh) by standard technique or using a Biotage Isolera Flash Purification System eluting with solvents as indicated.

GC Spectra were recorded on an Agilent Technologies 6890 GC-system with a HP-5MS column (0.32 mm x 30 m, Film: 0.25 μm) using H<sub>2</sub> gas as the mobile phase. The major signals are quoted in m/z with the relative intensity in parentheses. The methods used start with the injection temperature T<sub>0</sub>; after holding this temperature for 3 min, the column is heated to temperature T<sub>1</sub> (ramp) and this temperature is held for an additional time t:

Method 50\_20\_320: T<sub>0</sub> = 50 °C, T<sub>1</sub> = 320 °C, ramp = 20 °C/min, t = 3 min.

<sup>1</sup>H and <sup>13</sup>C NMR spectra were recorded on a Bruker AV 300 or AV 400, Varian 500 MHz INOVA or Varian Unity plus 600 in solvents as indicated. Chemical shifts (δ) are given in ppm relative to TMS. The residual solvent signals were used as references and the chemical shifts converted to the TMS scale (CDCl<sub>3</sub>: δ<sub>H</sub> = 7.26 ppm, δ<sub>C</sub> = 77.16 ppm; d<sup>8</sup>-toluene: δ<sub>H</sub> = 7.00 ppm, δ<sub>C</sub> = 137.86 ppm).

ESI mass spectra were recorded on a Bruker Daltonics MicroTof.

Infrared spectra were recorded on a Varian Associates FT-IR 3100 Excalibur and Shimadzu FTIR 8400S. The wave numbers (ν) of recorded IR-signals are quoted in cm<sup>-1</sup>.

Elemental analyses were recorded on a Vario EL III of Fa. Elementar Analysensysteme GmbH, Hanau.

## 2. General Procedure A for the Anion Exchange (6a-h)

NHC-HCl or NHC-HBr (**5**) (0.20 mmol, 1.0 eq.) and silver trifluoromethanesulfonate (AgOTf) (0.22 mmol, 1.1 eq.) were weighed in the glovebox into an oven dried, aluminum foil covered reaction vessel with Teflon screw cap under an argon atmosphere. Outside the glovebox CH<sub>2</sub>Cl<sub>2</sub> (2.0 mL) was added under an argon atmosphere and the reaction mixture was stirred at room temperature for 1 h. The resulting suspension was filtered through a celite pad and the solvent was removed under reduced pressure. The crude product was purified by column chromatography (Ø = 2.5 cm, SiO<sub>2</sub> = 6 cm, CH<sub>2</sub>Cl<sub>2</sub>/MeOH 15:1). The products **6a-h** were dried at 110 °C under high vacuum overnight to yield the trifluoromethanesulfonates in almost quantitative yields.

### 4-Methyl-1,3-bis-(2,4,6-trimethylphenyl)-3H-imidazol-1-ium trifluoromethanesulfonate (**6a**)

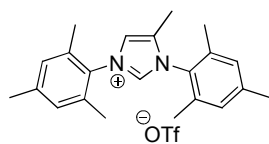

Following the general procedure A, **5a** (107 mg, 0.30 mmol, 1.0 eq.) and AgOTf (86 mg, 0.33 mmol, 1.1 eq.) were stirred in CH<sub>2</sub>Cl<sub>2</sub> (3.0 mL) at room temperature for 1 h. The suspension was directly put on silica gel column and subjected to column chromatography (Ø = 2.5 cm, SiO<sub>2</sub> = 6 cm, CH<sub>2</sub>Cl<sub>2</sub>/MeOH 20:1) to furnish **6a** (140 mg, 0.298 mmol, 99 %) white solid.

IR (ATR):  $\nu$  = 2362, 1547, 1537, 1281, 1255, 1223, 1145, 1029, 863.

<sup>1</sup>H NMR (CDCl<sub>3</sub>, 300 MHz)  $\delta$ : 2.03 (6 H, s), 2.09 (6 H, s), 2.13 (3 H, d,  $J$  = 1.2 Hz), 2.32 (3 H, s), 2.35 (3 H, s), 6.99 (2 H, s), 7.04 (2 H, s), 7.34-7.37 (1 H, m), 9.03 (1 H, d,  $J$  = 1.8 Hz).

<sup>13</sup>C NMR (CDCl<sub>3</sub>, 75 MHz)  $\delta$ : 9.0, 17.2, 21.1 (2 C), 121.4, 128.1, 129.7 (2 C), 129.9 (2 C), 130.5, 133.0, 133.9, 134.4, 136.9, 141.1, 141.5.

<sup>19</sup>F NMR (CDCl<sub>3</sub>, 282 MHz)  $\delta$ : -78.75.

ESI-MS: for C<sub>22</sub>H<sub>27</sub>N<sub>2</sub><sup>+</sup> calcd: 319.2169, found: 319.2179.

### 4,5-Dimethyl-1,3-bis-(2,4,6-trimethylphenyl)-3*H*-imidazol-1-ium trifluoromethanesulfonate (**6b**)

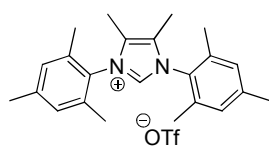

Following the general procedure A, **5b** (74 mg, 0.20 mmol, 1.0 eq.) and AgOTf (57 mg, 0.22 mmol, 1.1 eq.) were stirred in CH<sub>2</sub>Cl<sub>2</sub> (2.0 mL) at room temperature for 1 h. The suspension was filtered over celite pad and the solvent was removed under reduced pressure. After purification by column chromatography (Ø = 2.5 cm, SiO<sub>2</sub> = 6 cm, CH<sub>2</sub>Cl<sub>2</sub>/MeOH 15:1) **6b** was obtained in 99 % yield (96 mg, 0.199 mmol) as white powder.

Elemental analysis: for C<sub>24</sub>H<sub>29</sub>F<sub>3</sub>N<sub>2</sub>O<sub>3</sub>S calcd: C 59.73, H 6.04, N 5.76; found: C 59.73, H 6.06, N 5.81.

IR (ATR):  $\nu$  = 3116, 1541, 1488, 1260, 1223, 1145, 1030, 858, 636.

<sup>1</sup>H NMR (CDCl<sub>3</sub>, 300 MHz)  $\delta$ : 2.05 (12 H, s), 2.07 (6 H, s), 2.35 (6 H, s), 7.05 (4 H, s), 9.06 (1 H, s).

<sup>13</sup>C NMR (CDCl<sub>3</sub>, 75 MHz)  $\delta$ : 8.7, 17.4, 21.3, 128.4, 128.7, 130.1, 134.6, 135.8, 141.6.

<sup>19</sup>F NMR (CDCl<sub>3</sub>, 282 MHz)  $\delta$ : -78.7.

ESI-MS: for C<sub>23</sub>H<sub>29</sub>N<sub>2</sub><sup>+</sup> calcd: 333.2325, found: 333.2334.

### 5-Butyl-4-pentyl-1,3-bis-(2,4,6-trimethylphenyl)-3*H*-imidazol-1-ium trifluoromethanesulfonate (**6c**)

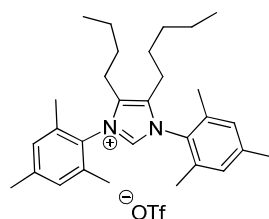

Following the general procedure A, **5c** (154 mg, 0.30 mmol, 1.0 eq.) and AgOTf (93 mg, 0.36 mmol, 1.2 eq.) were stirred in CH<sub>2</sub>Cl<sub>2</sub> (2.0 mL) at room temperature for 1 h. The suspension was filtered through celite pad and the solvent was evaporated under reduced pressure. Column chromatography (Ø = 2.5 cm, SiO<sub>2</sub> = 6 cm, CH<sub>2</sub>Cl<sub>2</sub>/MeOH 15:1) of the residue afforded **6c** (175 mg, 0.30 mmol, 100 %) as an yellow very viscous liquid.

Elemental analysis: for  $C_{31}H_{43}F_3N_2O_3S$  calcd: C 64.11, H 7.46, N 4.82; found: C 64.09, H 7.23, N 4.72.

IR (ATR):  $\nu = 3103, 2956, 2931, 2871, 1610, 1538, 1454, 1282, 1255, 1223, 1148, 1030, 863$ .

$^1H$  NMR ( $CDCl_3$ , 300 MHz)  $\delta$ : 0.75-0.85 (6 H, m), 1.10-1.40 (10 H, m), 2.07 (12 H, s), 2.36 (6 H, s), 2.38-2.46 (4 H, m), 7.05 (4 H, s), 9.19 (1 H, s).

$^{13}C$  NMR ( $CDCl_3$ , 75 MHz)  $\delta$ : 13.4, 13.6, 17.4, 17.4, 21.2, 21.9, 22.2, 22.9, 23.1, 27.9, 30.3, 31.2, 128.5, 130.0, 132.1, 132.1, 134.4, 136.8, 141.3.

$^{19}F$  NMR ( $CDCl_3$ , 282 MHz)  $\delta$ : -78.8.

ESI-MS: for  $C_{30}H_{43}N_2^+$  calcd: 431.3421, found: 431.3425.

### 1,3-Bis-(2,4,6-trimethylphenyl)-3,4,5,6-tetrahydro-cyclopentaimidazol-1-ium trifluoromethanesulfonate (**6d**)

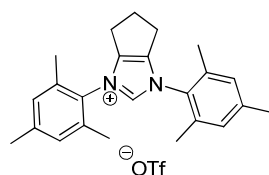

Following the general procedure A, **5d** (127 mg, 0.30 mmol, 1.0 eq.) and AgOTf (93 mg, 0.36 mmol, 1.2 eq.) were stirred in  $CH_2Cl_2$  (2.0 mL) at room temperature for 1 h. The suspension was filtered through celite pad and the solvent was evaporated under reduced pressure. Column chromatography ( $\varnothing = 2.5$  cm,  $SiO_2 = 6$  cm,  $CH_2Cl_2/MeOH$  20:1) of the residue afforded **6d** (130 mg, 0.26 mmol, 87 %) as a white powder.

Elemental analysis: for  $C_{25}H_{29}F_3N_2O_3S$  calcd: C 60.71, H 5.91, N 5.66; found: C 60.72, H 5.59, N 5.54.

IR (ATR):  $\nu = 3081, 1519, 1277, 1252, 1241, 1223, 1220, 1150, 1028, 860, 847$ .

$^1H$  NMR ( $CDCl_3$ , 300 MHz)  $\delta$ : 2.12 (12 H, s), 2.34 (6 H, s), 2.75 (6 H, br s), 7.02 (4 H, s), 8.93 (1 H, s).

$^{13}C$  NMR ( $CDCl_3$ , 75 MHz)  $\delta$ : 17.4, 21.1, 23.2, 27.8, 129.3, 129.8, 133.9, 139.7, 140.0, 141.2.

$^{19}F$  NMR ( $CDCl_3$ , 282 MHz)  $\delta$ : -78.7.

ESI-MS: for  $C_{24}H_{29}N_2^+$  calcd: 345.2325, found: 345.2329.

**1,3-Bis-(2,4,6-trimethylphenyl)-4,5,6,7-tetrahydro-3*H*-benzimidazol-1-ium  
trifluoromethanesulfonate (6e)**

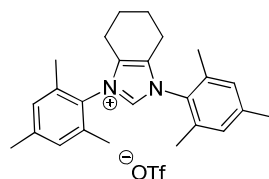

Following the general procedure A, **5e** (207 mg, 0.47 mmol, 1.0 eq.) and AgOTf (145 mg, 0.56 mmol, 1.2 eq.) were stirred in CH<sub>2</sub>Cl<sub>2</sub> (2.0 mL) at room temperature for 1 h. The suspension was filtered through celite pad and the solvent was evaporated under reduced pressure. Column chromatography (Ø = 2.5 cm, SiO<sub>2</sub> = 6 cm, CH<sub>2</sub>Cl<sub>2</sub>/MeOH 20:1) of the residue afforded **6e** (227 mg, 0.45 mmol, 95 %) as a white powder.

Elemental analysis: for C<sub>26</sub>H<sub>31</sub>F<sub>3</sub>N<sub>2</sub>O<sub>3</sub>S calcd: C 61.40, H 6.14, N 5.51; found: C 61.06, H 5.95, N 5.40.

IR (ATR):  $\nu$  = 3091, 2937, 2361, 1610, 1531, 1480, 1258, 1243, 1223, 1148, 1030, 858.

<sup>1</sup>H NMR (CDCl<sub>3</sub>, 300 MHz)  $\delta$ : 1.88-1.96 (4 H, m), 2.07 (12 H, s), 2.30-2.35 (4 H, m), 2.35 (6 H, s), 7.04 (4 H, s), 9.15 (1 H, s).

<sup>13</sup>C NMR (CDCl<sub>3</sub>, 75 MHz)  $\delta$ : 17.29, 19.90, 21.13, 21.51, 128.35, 129.87, 130.89, 134.27, 135.89, 141.34.

<sup>19</sup>F NMR (CDCl<sub>3</sub>, 282 MHz)  $\delta$ : -78.7.

ESI-MS: for C<sub>25</sub>H<sub>31</sub>N<sub>2</sub><sup>+</sup> calcd: 359.2482, found: 359.2476.

**1,3-Bis-(2,4,6-trimethylphenyl)-3,4,5,6,7,8-hexahydro-cycloheptimidazol-1-ium  
trifluoromethanesulfonate (6f)**

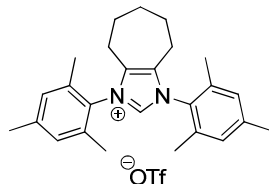

Following the general procedure A, **5f** (91 mg, 0.20 mmol, 1.0 eq.) and AgOTf (57 mg, 0.22 mmol, 1.1 eq.) were stirred in CH<sub>2</sub>Cl<sub>2</sub> (2.0 mL) at room temperature for 1 h. The suspension was filtered through celite pad and the solvent was removed under reduced pressure. After purification by column chromatography (Ø = 2.5 cm, SiO<sub>2</sub> = 6 cm, CH<sub>2</sub>Cl<sub>2</sub>/MeOH 15:1) **6f** was obtained in 99 % yield (104 mg, 0.199 mmol) as off white powder.

Elemental analysis: *found*: C 62.12, H 6.15, N 5.29, *calcd.* for C<sub>27</sub>H<sub>33</sub>F<sub>3</sub>N<sub>2</sub>O<sub>3</sub>S: C 62.05, H 6.36, N 5.36.

IR (ATR):  $\nu$  = 3105, 3034, 2926, 2857, 2359, 1611, 1542, 1446, 1279, 1253, 1222, 1149, 1030, 859, 636, 571.

<sup>1</sup>H NMR (CDCl<sub>3</sub>, 300 MHz)  $\delta$ : 1.67-1.77 (4 H, m), 1.85-1.95 (2 H, m), 2.05 (12 H, s), 2.34 (6 H, s), 2.40-2.50 (4 H, m), 7.04 (4 H, s), 8.98 (1 H, s).

<sup>13</sup>C NMR (CDCl<sub>3</sub>, 75 MHz)  $\delta$ : 17.4, 21.3, 23.9, 26.6, 30.2, 128.6, 130.0, 133.9, 134.8, 134.8, 141.5.

<sup>19</sup>F NMR (282 MHz, CDCl<sub>3</sub>)  $\delta$ : -78.7.

ESI-MS: for C<sub>26</sub>H<sub>33</sub>N<sub>2</sub><sup>+</sup> *calcd.*: 373.2638, *found*: 373.2641.

### 1,3-Bis-(2,4,6-trimethylphenyl)-4,5-dihydro-1H-naphtho[1,2-d]imidazol-3-ium trifluoromethanesulfonate (**6g**)

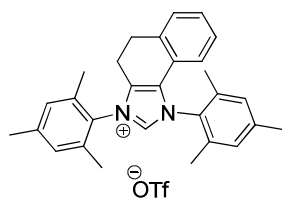

Following the general procedure A, **5g** (97 mg, 0.20 mmol, 1.0 eq.) and AgOTf (57 mg, 0.22 mmol, 1.1 eq.) were stirred in CH<sub>2</sub>Cl<sub>2</sub> (2.0 mL) at room temperature for 1 h. The suspension was filtered through celite pad and the solvent was removed under reduced pressure. After purification by column chromatography ( $\varnothing$  = 2.5 cm, SiO<sub>2</sub> = 6 cm, CH<sub>2</sub>Cl<sub>2</sub>/MeOH 15:1) **6g** was obtained in 97 % yield (108 mg, 0.194 mmol) as off white powder.

Elemental analysis: *found*: C 64.50, H 5.34, N 4.92, *calcd.* for C<sub>30</sub>H<sub>31</sub>F<sub>3</sub>N<sub>2</sub>O<sub>3</sub>S: C 64.73, H 5.61, N 5.03.

IR (ATR):  $\nu$  = 3083, 3023, 2923, 2861, 2363, 1609, 1527, 1481, 1451, 1256, 1223, 1146, 1029, 855, 765, 636, 572.

<sup>1</sup>H NMR (CDCl<sub>3</sub>, 300 MHz)  $\delta$ : 2.11 (6 H, s), 2.13 (6 H, s), 2.36 (3 H, s), 2.41 (3 H, s), 2.69 (2 H, t,  $J$  = 8.0 Hz), 3.17 (2 H, t,  $J$  = 8.0 Hz), 6.46 (1 H, d,  $J$  = 7.7 Hz), 7.00-7.08 (1 H, m), 7.06 (2 H, s), 7.11 (2 H, s), 7.22-7.33 (2 H, m), 9.31 (1 H, s).

<sup>13</sup>C NMR (CDCl<sub>3</sub>, 75 MHz)  $\delta$ : 17.4, 17.6, 18.7, 21.3, 21.4, 28.8, 118.4, 120.6, 122.7, 123.9, 128.0, 128.1, 128.9, 129.4, 129.9, 129.9, 130.1, 130.4, 131.6, 134.4, 134.5, 134.6, 137.4, 141.7, 141.9.

<sup>19</sup>F NMR (282 MHz, CDCl<sub>3</sub>)  $\delta$ : -78.7.

ESI-MS: for  $C_{29}H_{31}N_2^+$  calcd: 407.2482, found: 407.2484.

**1,3-Bis-(2,6-diisopropylphenyl)-4,5,6,7-tetrahydro-3H-benzoimidazol-1-ium  
trifluoromethanesulfonate (6h)**

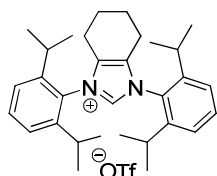

Following the general procedure A, **5h** (105 mg, 0.20 mmol, 1.0 eq.) and AgOTf (57 mg, 0.22 mmol, 1.1 eq.) were stirred in  $CH_2Cl_2$  (2.0 mL) at room temperature for 1 h. The suspension was filtered through celite pad and the solvent was removed under reduced pressure. After purification by column chromatography ( $\varnothing = 2.5$  cm,  $SiO_2 = 6$  cm,  $CH_2Cl_2/MeOH$  15:1) **6h** was obtained in 98 % yield (117 mg, 0.197 mmol) as white powder.

Elemental analysis: *found*: C 64.62, H 7.31, N 4.64, *calcd.* for  $C_{32}H_{43}F_3N_2O_3S$ : C 64.84, H 7.31, N 4.73.

IR (ATR):  $\nu = 3080, 2957, 2870, 1531, 1465, 1286, 1250, 1221, 1147, 1029, 805, 762, 636$ .

$^1H$  NMR ( $CDCl_3$ , 300 MHz)  $\delta$ : 1.20 (6 H, d,  $J = 6.9$  Hz), 1.25 (6 H, d,  $J = 6.9$  Hz), 1.90-2.00 (4 H, m), 2.30 (4 H, sep,  $J = 6.9$  Hz), 2.28 – 2.39 (4 H, m), 7.34 (4 H, d,  $J = 7.8$  Hz), 7.56 (2 H, t,  $J = 7.8$  Hz), 9.39 (1 H, s).

$^{13}C$  NMR ( $CDCl_3$ , 75 MHz)  $\delta$ : 20.3, 21.5, 23.4, 24.8, 29.3, 124.9, 127.7, 131.8, 132.2, 137.1, 145.2.

$^{19}F$  NMR (282 MHz,  $CDCl_3$ )  $\delta$ : -78.7.

ESI-MS: for  $C_{31}H_{43}N_2^+$  calcd: 443.3421, found: 443.3425.



### 3. General Procedure B for the Synthesis of [(NHC)Ir(COD)Cl] complexes

#### 7a-h

According to a literature procedure,<sup>1</sup> **6** (0.15 mmol, 1 eq.) was added to a solution of *t*-BuOK (0.18 mmol, 1.2 eq.) in THF (1 mL). After stirring at room temperature for 20 min, a solution of [Ir(COD)Cl]<sub>2</sub> (0.083 mmol, 1.1 eq.) in THF (1 mL) was added. The resulting mixture was stirred at room temperature overnight, filtered over a celite pad and the solvent was removed under reduced pressure. The crude product was purified by column chromatography (Ø = 2.5 cm, SiO<sub>2</sub> = 8 cm, *n*-pentane/EtOAc 10:1) to yield the complex **7** as yellow solid.

#### Preparation of [(NHC)Ir(COD)Cl] complex **7a**

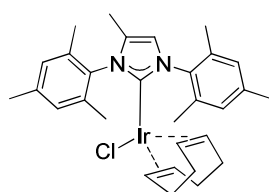

According to the general procedure B, **5a** (53 mg, 0.15 mmol, 1 eq.) was added to a solution of *t*-BuOK (20 mg, 0.18 mmol, 1.2 eq.) in THF (1 mL). After stirring at room temperature for 20 min, a solution of [Ir(COD)Cl]<sub>2</sub> (55 mg, 0.083 mmol, 1.1 eq.) in THF (1 mL) was added. The resulting mixture was stirred at room temperature overnight, filtered through celite and subjected to column chromatography (Ø = 2.5 cm, SiO<sub>2</sub> = 8 cm, *n*-pentane/EtOAc 15:1) to yield **7a** (89 mg, 0.14 mmol, 91 %) as yellow solid.

Elemental analysis: for C<sub>30</sub>H<sub>38</sub>ClIrN<sub>2</sub> calcd: C 55.07, H 5.85, N 4.28; found: C 55.16, H 5.51, N 4.16.

IR (ATR):  $\nu$  = 2915, 2876, 2828, 1486, 1379, 1323, 1213, 1152, 1034, 998, 969, 850, 757, 717.

<sup>1</sup>H NMR (CDCl<sub>3</sub>, 400 MHz)  $\delta$ : 1.17-1.38 (4 H, m), 1.55-1.75 (4 H, m), 1.87 (3 H, s), 2.10 (3 H, s), 2.13 (3 H, s), 2.28 (3 H, s), 2.36 (9 H, m), 2.94-3.06 (2 H, m), 4.05-4.15 (2 H, m), 6.69 (1 H, s), 6.94-7.05 (4 H, m).

<sup>13</sup>C NMR (CDCl<sub>3</sub>, 100 MHz)  $\delta$ : 18.3, 18.4, 19.8, 19.8, 21.2, 21.3, 28.7, 29.4, 33.3, 34.0, 50.9, 51.5, 81.7, 82.2, 128.1, 128.2, 129.6, 129.7, 130.6, 133.9, 134.5, 134.9, 136.6, 137.3, 137.9, 138.5, 138.7, 180.6.

ESI-MS: for  $C_{30}H_{38}IrN_2^+$  calcd: 619.2669, found: 619.2653  $[M-Cl]^+$ , for  $C_{30}H_{38}ClIrN_2Na^+$  calcd: 677.2245, found: 677.2229  $[M+Na]^+$ , for  $C_{31}H_{41}IrN_3^+$  calcd: 660.2930, found: 660.2920  $[M+MeCN-Cl]^+$ .

### Preparation of [(NHC)Ir(COD)Cl] complex **7c**

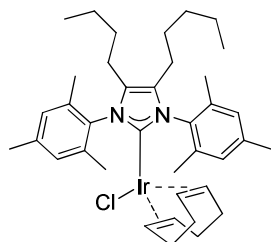

According to the general procedure B, **6c** (87 mg, 0.15 mmol, 1 eq.) was added to a solution of *t*-BuOK (21 mg, 0.18 mmol, 1.2 eq.) in THF (1 mL). After stirring at room temperature for 20 min, a solution of  $[Ir(COD)Cl]_2$  (55 mg, 0.081 mmol, 1.1 eq.) in THF (1 mL) was added. The resulting mixture was stirred at room temperature overnight, adsorbed on celite and subjected to column chromatography ( $\varnothing = 2.5$  cm,  $SiO_2 = 8$  cm, *n*-pentane/EtOAc 20:1) to yield **7c** (107 mg, 0.14 mmol, 93 %) as an orange very viscous liquid.

IR (ATR):  $\nu = 2955, 2926, 2872, 2829, 1484, 1458, 1373, 1317, 1301, 852, 734$ .

$^1H$  NMR ( $CDCl_3$ , 300 MHz)  $\delta$ : 0.77 (3H, t,  $J = 6.9$  Hz), 0.78 (3H, t,  $J = 6.6$  Hz), 1.05-1.30 (14 H, m), 1.50 - 1.75 (4 H, m), 2.06 (6 H, s), 2.10 - 2.25 (4 H, m), 2.29 (6 H, s), 2.34 (6 H, s), 2.85 - 2.95 (2 H, m), 3.98 - 4.08 (2 H, m), 6.95 (2 H, s), 6.99 (2 H, s).

$^{13}C$  NMR ( $CDCl_3$ , 75 MHz)  $\delta$ : 13.65, 13.79, 18.39, 18.41, 20.02, 20.04, 21.12, 22.11, 23.46, 23.66, 28.25, 28.83, 28.86, 30.79, 31.17, 33.52, 33.54, 51.01, 51.03, 80.95, 80.98, 128.01, 129.52, 130.66, 130.70, 134.21, 134.86, 137.61, 138.14, 178.38.

$^{19}F$  NMR ( $CDCl_3$ , 282 MHz)  $\delta$ : no signals.

ESI-MS: for  $C_{38}H_{54}IrN_2^+$  calcd: 731.3916, found: 731.3913  $[M-Cl]^+$ , for  $C_{38}H_{54}ClIrN_2Na^+$  calcd: 789.3502, found: 789.3491  $[M+Na]^+$ .

### Preparation of [(NHC)Ir(COD)Cl] complex **7d**

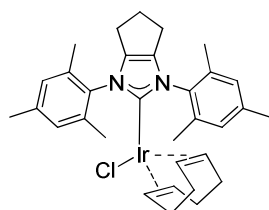

According to the general procedure B, **6d** (74 mg, 0.15 mmol, 1 eq.) was added to a solution of *t*-BuOK (21 mg, 0.18 mmol, 1.2 eq.) in THF (1 mL). After stirring at room temperature for 20 min, a solution of [Ir(COD)Cl]<sub>2</sub> (55 mg, 0.081 mmol, 1.1 eq.) in THF (1 mL) was added.. The resulting mixture was stirred at room temperature overnight, adsorbed on celite and subjected to column chromatography ( $\varnothing = 2.5$  cm, SiO<sub>2</sub> = 8 cm, *n*-pentane/EtOAc 20:1) to yield **7d** (75 mg, 0.11 mmol, 73 %) as an yellow solid.

Elemental analysis: for C<sub>32</sub>H<sub>40</sub>ClIrN<sub>2</sub> calcd: C 56.49, H 5.93, N 4.12; found: C 56.33, H 5.85, N 3.84.

IR (ATR):  $\nu = 2919, 1484, 1413, 1350, 1323, 1282, 1219, 1074, 1032, 852$ .

<sup>1</sup>H NMR (CDCl<sub>3</sub>, 300 MHz)  $\delta$ : 1.05-1.35 (4 H, m), 1.55-1.75 (4 H, m), 2.14 (6 H, s), 2.34 (12 H, s), 2.49 (6 H, br s), 2.95-3.04 (2 H, m), 4.05-4.15 (2 H, m), 6.95 (2 H, s), 6.98 (2 H, s).

<sup>13</sup>C NMR (CDCl<sub>3</sub>, 75 MHz)  $\delta$ : 18.2, 19.7, 21.1, 23.8, 28.0, 28.9, 33.5, 51.1, 82.0, 127.9, 129.4, 134.2, 134.8, 137.1, 138.2, 138.2, 186.0.

<sup>19</sup>F NMR (CDCl<sub>3</sub>, 282 MHz)  $\delta$ : no signals.

ESI-MS: for C<sub>32</sub>H<sub>40</sub>IrN<sub>2</sub><sup>+</sup> calcd: 645.2821, found: 645.2824 [M-Cl]<sup>+</sup>, for C<sub>32</sub>H<sub>40</sub>ClIrN<sub>2</sub>Na<sup>+</sup> calcd: 703.2407, found: 703.2404 [M+Na]<sup>+</sup>, for C<sub>34</sub>H<sub>43</sub>IrN<sub>3</sub><sup>+</sup> calcd: 686.3086, found: 686.3082 [M+MeCN-Cl]<sup>+</sup>.

### Preparation of [(NHC)Ir(COD)Cl] complex **7e**

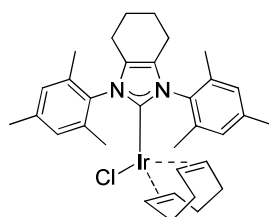

According to the general procedure B, **6e** (77 mg, 0.15 mmol, 1 eq.) was added to a solution of *t*-BuOK (21 mg, 0.18 mmol, 1.2 eq.) in THF (1 mL). After stirring at room temperature for 20 min, a solution of [Ir(COD)Cl]<sub>2</sub> (55 mg, 0.081 mmol, 1.1 eq.) in THF (1 mL) was added.

The resulting mixture was stirred at room temperature overnight, adsorbed on celite and subjected to column chromatography ( $\emptyset = 2.5$  cm,  $\text{SiO}_2 = 8$  cm, *n*-pentane/EtOAc 20:1) to yield **7e** (85 mg, 0.12 mmol, 80 %) as an orange solid.

Elemental analysis: for  $\text{C}_{33}\text{H}_{42}\text{ClIrN}_2$  calcd: C 57.08, H 6.10, N 4.03; found: C 57.09, H 6.21, N 3.81.

$^1\text{H}$  NMR ( $\text{CDCl}_3$ , 300 MHz)  $\delta$ : 1.15-1.35 (4 H, m), 1.54-1.68 (4 H, m), 1.68-1.78 (4 H, m), 2.02-2.14 (10 H, m), 2.30 (6 H, s), 2.35 (6 H, s), 3.01-3.05 (2 H, m), 4.04-4.09 (2 H, m), 6.96 (2 H, s), 6.99 (2 H, s).

$^{13}\text{C}$  NMR ( $\text{CDCl}_3$ , 75 MHz)  $\delta$ : 18.3, 19.6, 20.7, 22.3, 28.9, 33.5, 50.8, 81.4, 128.0, 129.1, 129.5, 133.9, 134.6, 137.5, 138.2, 178.7.

$^{19}\text{F}$  NMR ( $\text{CDCl}_3$ , 282 MHz)  $\delta$ : no signals.

ESI-MS: for  $\text{C}_{33}\text{H}_{42}\text{IrN}_2^+$  calcd: 659.2977, found: 659.2968  $[\text{M}-\text{Cl}]^+$ , for  $\text{C}_{35}\text{H}_{45}\text{IrN}_3^+$  calcd: 700.3243, found: 700.3239  $[\text{M}+\text{MeCN}-\text{Cl}]^+$ .

### Preparation of [(NHC)Ir(COD)Cl] complex **7f**

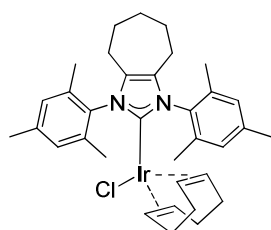

According to the general procedure B, **6f** (78 mg, 0.15 mmol, 1 eq.) was added to a solution of *t*-BuOK (20 mg, 0.18 mmol, 1.2 eq.) in THF (1 mL). After stirring at room temperature for 20 min, a solution of  $[\text{Ir}(\text{COD})\text{Cl}]_2$  (55 mg, 0.083 mmol, 1.1 eq.) in THF (1 mL) was added. The resulting mixture was stirred at room temperature overnight, filtered through celite and subjected to column chromatography ( $\emptyset = 2.5$  cm,  $\text{SiO}_2 = 8$  cm, *n*-pentane/EtOAc 15:1) to yield **7f** (102 mg, 0.14 mmol, 96 %) as an yellow solid.

Elemental analysis: for  $\text{C}_{34}\text{H}_{44}\text{ClIrN}_2$  calcd: C 57.65, H 6.26, N 3.95; found: C 57.59, H 5.97, N 3.85.

IR (ATR):  $\nu = 3014, 2915, 2877, 2852, 2830, 1484, 1446, 1362, 1307, 1212, 1033, 1000, 966, 883, 852, 576$ .

$^1\text{H}$  NMR ( $\text{CDCl}_3$ , 400 MHz)  $\delta$ : 1.15-1.29 (4 H, m), 1.52-1.68 (8 H, m), 1.70-1.79 (2 H, m), 2.02 (6 H, s), 2.20-2.26 (4 H, m), 2.30 (6 H, s), 2.35 (6 H, s), 3.01-3.05 (2 H, m), 4.00-4.06 (2 H, m), 6.96 (2 H, s), 7.00 (2 H, s).

$^{13}\text{C}$  NMR ( $\text{CDCl}_3$ , 100 MHz)  $\delta$ : 18.4, 19.9, 21.3, 24.8, 27.3, 29.0, 30.8, 33.6, 50.8, 80.9, 128.0, 129.6, 132.1, 134.3, 138.1, 138.4, 177.5.

ESI-MS: for  $\text{C}_{34}\text{H}_{44}\text{IrN}_2^+$  calcd: 673.3134, found: 673.3124  $[\text{M}-\text{Cl}]^+$ , for  $\text{C}_{34}\text{H}_{44}\text{ClIrN}_2^+$  calcd: 731.2714, found: 731.2699  $[\text{M}+\text{Na}]^+$ .

### Preparation of $[(\text{NHC})\text{Ir}(\text{COD})\text{Cl}]$ complex **7g**

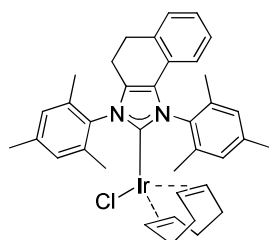

According to the general procedure B, **6g** (84 mg, 0.125 mmol, 1 eq.) was added to a solution of *t*-BuOK (17 mg, 0.15 mmol, 1.2 eq.) in THF (1 mL). After stirring at room temperature for 20 min, a solution of  $[\text{Ir}(\text{COD})\text{Cl}]_2$  (46 mg, 0.069 mmol, 1.1 eq.) in THF (1 mL) was added. The resulting mixture was stirred at room temperature overnight, filtered through celite and subjected to column chromatography ( $\text{Ø} = 2.5$  cm,  $\text{SiO}_2 = 8$  cm, *n*-pentane/EtOAc 15:1) to yield **7g** (88 mg, 0.12 mmol, 95 %) as an yellow solid.

Elemental analysis: for  $\text{C}_{37}\text{H}_{42}\text{ClIrN}_2$  calcd: C 59.86, H 5.70, N 3.77; found: C 59.47, H 5.36, N 3.61.

IR (ATR):  $\nu = 2913, 2875, 1486, 1357, 1324, 1305, 1237, 1034, 967, 851, 758, 720, 563$ .

$^1\text{H}$  NMR ( $\text{CDCl}_3$ , 400 MHz)  $\delta$ : 1.15-1.39 (4 H, m), 1.57-1.74 (4 H, m), 2.06 (3 H, s), 2.11 (3 H, s), 2.35 (6 H, s), 2.37 (3 H, s), 2.40-2.47 (2 H, m), 2.41 (3 H, s), 2.96 (2 H, t,  $J = 7.8$  Hz), 3.00-3.14 (2 H, m), 4.00-4.15 (2 H, m), 6.28 (1 H, d,  $J = 7.6$  Hz), 6.91 (2 H, t,  $J = 7.4$  Hz), 6.96-7.09 (5 H, m), 7.16 (1 H, d,  $J = 7.2$  Hz).

$^{13}\text{C}$  NMR ( $\text{CDCl}_3$ , 100 MHz)  $\delta$ : 18.3, 18.6, 19.8, 19.8, 20.0, 21.3, 21.4, 28.8, 29.2, 29.8, 33.5, 33.9, 51.2, 51.6, 82.1, 82.6, 119.8, 126.7, 127.4, 128.2, 128.4, 128.5, 128.6, 129.8, 130.0, 131.8, 133.6, 133.8, 134.8, 135.2, 135.4, 137.7, 137.9, 138.9, 139.0, 181.7.

ESI-MS: for  $\text{C}_{37}\text{H}_{42}\text{IrN}_2^+$  calcd: 707.2907, found: 707.2958  $[\text{M}-\text{Cl}]^+$ , for  $\text{C}_{37}\text{H}_{42}\text{ClIrN}_2\text{Na}^+$  calcd: 765.2558, found: 765.2530  $[\text{M}+\text{Na}]^+$ .

## Preparation of [(NHC)Ir(COD)Cl] complex **7h**

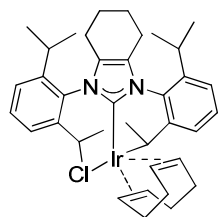

According to the general procedure B, **6h** (89 mg, 0.15 mmol, 1 eq.) was added to a solution of *t*-BuOK (20 mg, 0.18 mmol, 1.2 eq.) in THF (1 mL). After stirring at room temperature for 20 min, a solution of [Ir(COD)Cl]<sub>2</sub> (55 mg, 0.083 mmol, 1.1 eq.) in THF (1 mL) was added. The resulting mixture was stirred at room temperature overnight, filtered through celite and subjected to column chromatography (Ø = 2.5 cm, SiO<sub>2</sub> = 8 cm, *n*-pentane/EtOAc 15:1) to yield **7h** (93 mg, 0.12 mmol, 80 %) as an yellow solid.

Elemental analysis: for C<sub>39</sub>H<sub>54</sub>ClIrN<sub>2</sub> calcd: C 60.17, H 6.99, N 3.60; found: C 60.05, H 6.69, N 3.50.

IR (ATR):  $\nu$  = 2960, 2929, 2867, 2364, 2343, 1444, 1355, 1303, 806.

Room temperature <sup>1</sup>H NMR in CDCl<sub>3</sub> of complex **7h** gave broad signals due to rotamers resulting from restricted rotation of the N-2,6-diisopropylphenyl bonds. Therefore high temperature NMR was required to obtain free rotation.

<sup>1</sup>H NMR (toluene-d<sub>8</sub>, 500 MHz, 100 °C)  $\delta$ : 1.08 (12 H, d, 6.76 Hz), 1.23-1.30 (2 H, m), 1.31-1.38 (4 H, m), 1.46 (12 H, d, *J* = 6.76), 1.46-1.54 (2 H, m), 1.59-1.67 (2 H, m), 1.68-1.76 (2 H, m), 2.11-2.18 (4 H, brs), 3.11-3.18 (2 H, m), 3.28 (4 H, brs), 4.53-4.60 (2 H, m), 7.22 (4 H, d, *J* = 8.0 Hz), 7.30 (2 H, t, *J* = 8.0 Hz).

<sup>13</sup>C NMR (toluene-d<sub>8</sub>, 125 MHz)  $\delta$ : 22.7, 23.1, 25.5, 26.0, 29.1, 29.5, 34.5, 50.6, 83.0, 124.9, 130.2, 131.4, 135.3, 148.2, 185.1.

ESI-MS: for C<sub>39</sub>H<sub>54</sub>IrN<sub>2</sub><sup>+</sup> calcd: 743.3911, found: 743.3904 [M-Cl]<sup>+</sup>, for C<sub>39</sub>H<sub>54</sub>ClIrN<sub>2</sub>Na<sup>+</sup> calcd: 801.3497, found: 801.3477 [M+Na]<sup>+</sup>.

## 4. General Procedure C for the Formation of [(NHC)Ir(CO)<sub>2</sub>Cl] complexes

### 8a-h

According to a literature procedure,<sup>1</sup> a solution of [(NHC)Ir(COD)Cl] complex (**7**, 1 eq.) in CH<sub>2</sub>Cl<sub>2</sub> was cooled in an ice-water bath and exposed to an atmosphere of CO (balloon) for 1 h. The colour changed from bright yellow to pale yellow. The solvent was evaporated, *n*-pentane was added and the collected precipitate was washed with *n*-pentane (3 × 1 mL). Drying in vacuo afforded the product **8** as a pale yellow solid.

### Preparation of [(NHC)Ir(CO)<sub>2</sub>Cl] complex **8a**

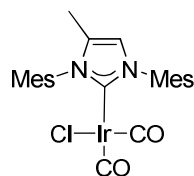

According to the general procedure C, solution of **7a** (50 mg, 0.076 mmol) in dry CH<sub>2</sub>Cl<sub>2</sub> (4.5 mL) was cooled in ice-water bath and exposed to an atmosphere of CO (balloon) for 1 h. Then the solvent was evaporated under reduced pressure, and the residue was washed with *n*-pentane (3 × 1 mL). Drying in vacuo afforded 42 mg (0.07 mmol, 91 %) of **8a** as pale yellow solid.

Elemental analysis: for C<sub>24</sub>H<sub>26</sub>ClIrN<sub>2</sub>O<sub>2</sub> calcd: C 47.87, H 4.35, N 4.65; found: C 48.05, H 4.09, N 4.53.

IR (ATR):  $\nu$  = 2922, 2860, 2050, 1969, 1610, 1485, 1399, 1378, 1337, 1223, 1200, 1036, 852.

IR (CH<sub>2</sub>Cl<sub>2</sub>):  $\nu_{\text{CO}}$  = 2064.4, 1978.0.

<sup>1</sup>H NMR (CDCl<sub>3</sub>, 400 MHz)  $\delta$ : 1.95 (3 H, s), 2.16 (6 H, s), 2.22 (6 H, s), 2.35 (3 H, s), 2.37 (3 H, s), 6.84 (1 H, brs), 6.99 (2 H, s), 7.02 (2 H, s).

<sup>13</sup>C NMR (CDCl<sub>3</sub>, 100 MHz)  $\delta$ : 9.8, 18.5, 18.6, 21.3, 21.4, 120.7, 129.3, 129.5, 131.5, 132.8, 135.1, 135.3, 135.5, 139.3, 139.6, 168.8, 175.3, 180.3.

ESI-MS: for C<sub>24</sub>H<sub>26</sub>IrN<sub>2</sub>O<sub>2</sub><sup>+</sup> calcd: 567.1619, found: 567.1625 [M-Cl]<sup>+</sup>, for C<sub>24</sub>H<sub>26</sub>ClIrN<sub>2</sub>O<sub>2</sub>Na<sup>+</sup> calcd: 625.1197, found: 625.1207 [M+Na]<sup>+</sup>.

### Preparation of [(NHC)Ir(CO)<sub>2</sub>Cl] complex **8c**

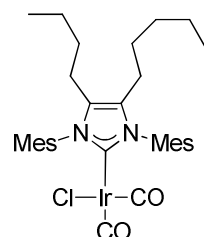

According to the general procedure C, solution of **7c** (50 mg, 0.084 mmol) in dry CH<sub>2</sub>Cl<sub>2</sub> (4 mL) was cooled in ice-water bath and exposed to an atmosphere of CO (balloon) for 1 h. Then the solvent was evaporated under reduced pressure. The residue was very well soluble in *n*-pentane. Complex **8c** was obtained after three times repeated lyophilisation from benzene as yellow powder (42 mg, 0.058 mmol, 89 %).

Elemental analysis: for C<sub>32</sub>H<sub>42</sub>ClIrN<sub>2</sub>O<sub>2</sub> calcd: C 53.80, H 5.93, N 3.92; found: C 53.45, H 5.73, N 3.76.

IR (CH<sub>2</sub>Cl<sub>2</sub>): ν<sub>CO</sub> = 2062.2, 1976.1.

<sup>1</sup>H NMR (CDCl<sub>3</sub>, 300 MHz) δ: 0.80 (6 H, t, *J* = 6.9 Hz), 1.10-1.30 (10 H, m), 2.15 (12 H, s), 2.23-2.31 (4 H, m), 2.36 (6 H, s), 6.99 (4 H, s).

<sup>13</sup>C NMR (CDCl<sub>3</sub>, 75 MHz) δ: 13.6, 13.8, 18.7, 18.7, 21.2, 22.1, 22.2, 23.4, 23.6, 28.1, 30.6, 31.2, 129.3, 131.4, 131.5, 133.2, 135.4, 139.0, 168.6, 173.3, 180.3.

ESI-MS: for C<sub>32</sub>H<sub>42</sub>IrN<sub>2</sub>O<sub>2</sub><sup>+</sup> calcd: 679.2876, found: 679.2872 [M-Cl]<sup>+</sup>, for C<sub>32</sub>H<sub>42</sub>ClIrN<sub>2</sub>O<sub>2</sub>Na<sup>+</sup> calcd: 737.2462, found: 737.2449 [M+Na]<sup>+</sup>.

### Preparation of [(NHC)Ir(CO)<sub>2</sub>Cl] complex **8d**

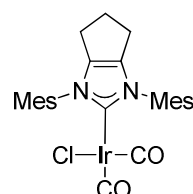

According to the general procedure C, a solution of **7d** (59 mg, 0.087 mmol) in dry CH<sub>2</sub>Cl<sub>2</sub> (4 mL) was cooled in ice-water bath and exposed to an atmosphere of CO (balloon) for 1 h. Then the solvent was evaporated under reduced pressure, and the residue was washed with



*n*-pentane (3 × 1 mL). Drying in vacuo afforded 44 mg (0.07 mmol, 80 %) of **8d** as a pale yellow solid.

Elemental analysis: for C<sub>26</sub>H<sub>30</sub>ClIrN<sub>2</sub>O<sub>2</sub> calcd: C 49.55, H 4.80, N 4.45; found: C 49.78, H 4.34, N 4.30.

IR (ATR):  $\nu$  = 2946, 2865, 2055, 1969, 1484, 1364, 1071, 1037, 857.

IR (CH<sub>2</sub>Cl<sub>2</sub>):  $\nu_{\text{CO}}$  = 2063.2, 1977.3.

<sup>1</sup>H NMR (CDCl<sub>3</sub>, 300 MHz)  $\delta$ : 2.22 (12 H, s), 2.35 (6 H, s), 2.50-2.65 (6 H, m), 6.98 (4 H, s).

<sup>13</sup>C NMR (CDCl<sub>3</sub>, 75 MHz)  $\delta$ : 18.5, 21.2, 23.7, 28.2, 129.2, 133.7, 135.0, 138.9, 139.1, 168.6, 180.2, 180.4.

ESI-MS: for C<sub>26</sub>H<sub>28</sub>IrN<sub>2</sub>O<sub>2</sub><sup>+</sup> calcd: 593.1780, found: 593.1776 [M-Cl]<sup>+</sup>, for C<sub>26</sub>H<sub>28</sub>ClIrN<sub>2</sub>O<sub>2</sub>Na<sup>+</sup> calcd: 651.1366, found: 651.1353 [M+Na]<sup>+</sup>.

### Preparation of [(NHC)Ir(CO)<sub>2</sub>Cl] complex **8e**

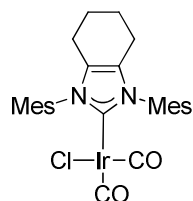

According to the general procedure C, solution of **7e** (55 mg, 0.08 mmol) in dry CH<sub>2</sub>Cl<sub>2</sub> (4 mL) was cooled ice-water bath and exposed to an atmosphere of CO (balloon) for 1 h. Then the solvent was evaporated under reduced pressure, and the residue was washed with *n*-pentane (3 × 1 mL). Drying in vacuo afforded 44 mg (0.068 mmol, 85 %) of **8e** as yellow solid.

Elemental analysis: for C<sub>27</sub>H<sub>30</sub>ClIrN<sub>2</sub>O<sub>2</sub> calcd: C 50.50, H 4.71, N 4.36; found: C 50.44, H 4.82, N 4.19.

IR (ATR):  $\nu$  = 2948, 2924, 2854, 2055, 1963, 1484, 1399, 1377, 1107, 1034, 857.

IR (CH<sub>2</sub>Cl<sub>2</sub>):  $\nu_{\text{CO}}$  = 2062.9, 1976.7.

<sup>1</sup>H NMR (CDCl<sub>3</sub>, 300 MHz)  $\delta$ : 1.80 (4 H, br s), 2.16 (16 H, s), 2.35 (6 H, s), 6.99 (4 H, s).

<sup>13</sup>C NMR (CDCl<sub>3</sub>, 75 MHz)  $\delta$ : 18.4, 20.6, 21.2, 22.1, 129.2, 129.9, 132.8, 135.3, 139.1, 168.8, 172.9, 180.5.

ESI-MS: for  $C_{27}H_{30}IrN_2O_2^+$  calcd: 607.1937, found: 607.1932  $[M-Cl]^+$ , for  $C_{27}H_{30}ClIrN_2O_2Na^+$  calcd: 665.1523, found: 665.1510  $[M+Na]^+$ .

### Preparation of $[(NHC)Ir(CO)_2Cl]$ complex **8f**

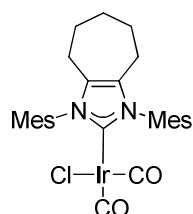

According to the general procedure C, solution of **7f** (60 mg, 0.084 mmol) in dry  $CH_2Cl_2$  (4 mL) was cooled in ice-water bath and exposed to an atmosphere of CO (balloon) for 1 h. Then the solvent was evaporated under reduced pressure, and the residue was washed with *n*-pentane ( $3 \times 1$  mL). The complex precipitated as a yellow solid which was twice lyophilised from benzene to give 38 mg (0.058 mmol, 69 %) of **8f**.

Elemental analysis: for  $C_{28}H_{32}ClIrN_2O_2$  calcd: C 51.25, H 4.92, N 4.27; found: C 51.74, H 4.74, N 4.01.

IR (ATR):  $\nu = 2925, 2855, 2054, 1965, 1484, 1383, 1215, 1034, 856$ .

IR ( $CH_2Cl_2$ ):  $\nu_{CO} = 2062.2, 1975.9$ .

$^1H$  NMR ( $CDCl_3$ , 300 MHz)  $\delta$ : 1.57-1.85 (6 H, m), 2.14 (12 H, s), 2.25-2.33 (4 H, m), 2.35 (6 H, s), 6.99 (4 H, s).

$^{13}C$  NMR ( $CDCl_3$ , 75 MHz)  $\delta$ : 18.4, 21.2, 24.6, 27.1, 30.6, 129.2, 132.7, 133.1, 135.7, 139.1, 168.9, 171.5, 180.3.

ESI-MS: for  $C_{28}H_{32}IrN_2O_2^+$  calcd: 621.2093, found: 621.2089  $[M-Cl]^+$ , for  $C_{28}H_{32}ClIrN_2O_2Na^+$  calcd: 679.1679, found: 679.1666  $[M+Na]^+$ .

### Preparation of [(NHC)Ir(CO)<sub>2</sub>Cl] complex **8g**

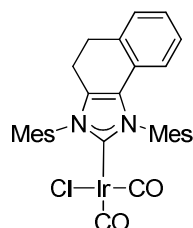

According to the general procedure C, solution of **7g** (49 mg, 0.07 mmol) in dry CH<sub>2</sub>Cl<sub>2</sub> (4 mL) was cooled ice-water bath and exposed to an atmosphere of CO (balloon) for 1 h. Then the solvent was evaporated under reduced pressure, and the residue was washed with *n*-pentane (3 × 1 mL). Drying in vacuo afforded 39 mg (0.056 mmol, 80 %) of **8g** as pale yellow solid.

Elemental analysis: for C<sub>31</sub>H<sub>30</sub>ClIrN<sub>2</sub>O<sub>2</sub> calcd: C 53.94, H 4.38, N 4.06; found: C 54.10, H 4.30, N 3.85.

IR (ATR):  $\nu$  = 2919, 2052, 1965, 1487, 1375, 1339, 1014, 856.

IR (CH<sub>2</sub>Cl<sub>2</sub>):  $\nu_{\text{CO}}$  = 2064.2, 1978.4.

<sup>1</sup>H NMR (CDCl<sub>3</sub>, 300 MHz)  $\delta$ : 2.18 (6 H, s), 2.21 (6 H, s), 2.37 (3 H, s), 2.42 (3 H, s), 2.52 (2 H, dd,  $J$  = 7.8, 7.8 Hz), 3.03 (2 H, dd,  $J$  = 7.8, 7.8 Hz), 6.32 (1 H, d,  $J$  = 7.8 Hz), 6.96 (1 H, dd,  $J$  = 7.5, 7.5 Hz), 7.02 (2 H, s), 7.05 (2 H, s), 7.11 (1 H, ddd,  $J$  = 0.9, 7.5, 7.5 Hz), 7.21 (1 H, d,  $J$  = 6.9 Hz).

<sup>13</sup>C NMR (CDCl<sub>3</sub>, 75 MHz)  $\delta$ : 18.5, 18.6, 19.4, 21.2, 21.4, 29.5, 119.9, 126.5, 127.4, 128.6, 129.4, 129.6, 132.0, 133.9, 134.2, 135.4, 135.5, 139.5, 139.7, 168.6, 175.4, 180.2.

ESI-MS: for C<sub>31</sub>H<sub>30</sub>IrN<sub>2</sub>O<sub>2</sub><sup>+</sup> calcd: 655.1937, found: 655.1932 [M-Cl]<sup>+</sup>, for C<sub>31</sub>H<sub>30</sub>ClIrN<sub>2</sub>O<sub>2</sub>Na<sup>+</sup> calcd: 713.1523, found: 713.1510 [M+Na]<sup>+</sup>.

### Preparation of [(NHC)Ir(CO)<sub>2</sub>Cl] complex **8h**

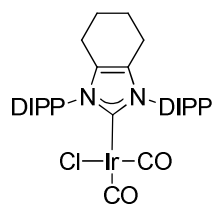

According to the general procedure C, solution of **7h** (62 mg, 0.08 mmol) in dry CH<sub>2</sub>Cl<sub>2</sub> (4.5 mL) was cooled ice-water bath and exposed to an atmosphere of CO (balloon) for 1 h.

Then the solvent was evaporated under reduced pressure, and the residue was washed with *n*-pentane (3 × 1 mL). Drying in vacuo afforded 54 mg (0.074 mmol, 93 %) of **8h** as pale yellow solid.

Elemental analysis: for C<sub>33</sub>H<sub>42</sub>ClIrN<sub>2</sub>O<sub>2</sub> calcd: C 54.57, H 5.83, N 3.86; found: C 54.09, H 5.39, N 3.69.

IR (ATR):  $\nu$  = 2964, 2931, 2868, 2054, 1970, 1456, 1370, 805, 773, 619.

IR (CH<sub>2</sub>Cl<sub>2</sub>):  $\nu_{\text{CO}}$  = 2064.7, 1978.3.

<sup>1</sup>H NMR (CDCl<sub>3</sub>, 300 MHz)  $\delta$ : 1.14 (12 H, d,  $J$  = 6.8 Hz), 1.38 (12 H, d,  $J$  = 6.8 Hz), 1.75 (4 H, m), 2.24 (4 H, m), 2.89 (4 H, sep,  $J$  = 6.8), 7.32 (4 H, d,  $J$  = 7.7 Hz), 7.49 (2 H, t,  $J$  = 7.7 Hz)

<sup>13</sup>C NMR (CDCl<sub>3</sub>, 75 MHz)  $\delta$ : 21.9, 22.2, 24.7, 25.4, 28.6, 124.6, 130.4, 131.7, 132.9, 146.4, 169.3, 176.1, 179.9.

ESI-MS: for C<sub>33</sub>H<sub>42</sub>IrN<sub>2</sub>O<sub>2</sub><sup>+</sup> calcd: 691.2872, found: 691.2882 [M-Cl]<sup>+</sup>, for C<sub>33</sub>H<sub>42</sub>ClIrN<sub>2</sub>O<sub>2</sub>Na<sup>+</sup> calcd: 749.2456, found: 749.2456 [M+Na]<sup>+</sup>.

## 5. General Procedure D for the Formation of $\gamma$ -butyrolactones 11a+11b

According to a literature procedure,<sup>2</sup> *para*-chlorobenzaldehyde (**11**) (141 mg, 1.0 mmol, 1 eq.) and NHC-HOTf (**6a-h**) or IMes-HCl (**6i**) (0.1 mmol, 10 mol%) were weighed in the glovebox into an oven dried (140 °C) crimp vial under an argon atmosphere and sealed. Outside the glovebox THF (2.5 mL), *trans*-cinnamaldehyde (**10**) (126  $\mu$ L, 1.0 mmol, 1 eq.) and DBU (15  $\mu$ L, 0.1 mmol, 10 mol%) were added via syringe and the reaction mixture was stirred at room temperature for 16 h. After a reaction time of 16 h mesitylene was added as internal standard. A sample of the well mixed reaction mixture was then passed through SiO<sub>2</sub> ( $\varnothing$  = 0.5 cm, high = 1 cm, ethyl acetate) to quench the reaction and remove the NHC-HX salt. The eluent was analysed on a calibrated GC.

**Table 1.** Yields and Diastereomeric ratio of 11a+11b catalyzed by **6a-i**, IMes·HCl and IPr·HCl

| entry | imidazolium salts employed as catalysts | <i>cis</i> -lactone average P/S <sup>a</sup> | <i>trans</i> -lactone average P/S <sup>a</sup> | ratio <b>11a/11b</b> [%] <sup>b</sup> | yield of <b>11a+11b</b> [%] <sup>b</sup> |
|-------|-----------------------------------------|----------------------------------------------|------------------------------------------------|---------------------------------------|------------------------------------------|
| 1     | <b>6a</b>                               | 0,82622939                                   | 0,16236026                                     | 84:16                                 | 49                                       |
| 2     | <b>6b</b>                               | 0,8923186                                    | 0,16737521                                     | 84:16                                 | 52                                       |
| 3     | <b>6c</b>                               | 0,71474334                                   | 0,1747639                                      | 80:20                                 | 44                                       |
| 4     | <b>6d</b>                               | 1,13502645                                   | 0,23229675                                     | 83:17                                 | 68                                       |
| 5     | <b>6e</b>                               | 0,96368937                                   | 0,1942418                                      | 83:17                                 | 57                                       |
| 6     | <b>6f</b>                               | 0,93896733                                   | 0,18951612                                     | 83:17                                 | 56                                       |
| 7     | <b>6g</b>                               | 0,92767301                                   | 0,22786183                                     | 80:20                                 | 57                                       |
| 8     | <b>6h</b>                               | 0,6158024                                    | 0,92160171                                     | 40:60                                 | 81                                       |
| 9     | IMes·HCl                                | 1,26711259                                   | 0,30470637                                     | 81:19                                 | 78                                       |

<sup>a</sup> Product/standard ratio of peak area obtained from GC. Mesitylene was used as internal standard. Each reaction sample was measured three times.

<sup>b</sup> Linear regression ( $y = 0,4884x - 0,0125$ ) was used to calculate the yield of *cis*-lactone.

<sup>c</sup> Linear regression ( $y = 0,5658x + 0,0027$ ) was used to calculate the yield of *trans*-lactone.

## 6. Calibration for GC yield determination of 11a and 11b

Both diastereomers **11a** and **11b** were prepared according to literature procedure and used for calibration.<sup>2</sup>

**Table 2.** Calibration for *cis*-5-(4-Chlorophenyl)-4-phenyltetrahydrofuran-2-one (**11a**)

|             | <b>11a</b> | <b>standard<sup>a</sup></b> | <b>P/S<sup>b</sup></b> | <b>average P/S<sup>c</sup></b> |
|-------------|------------|-----------------------------|------------------------|--------------------------------|
| <b>10%</b>  | 38,78708   | 169,15924                   | 0,2292933              | 0,230373206                    |
|             | 38,5386    | 165,59195                   | 0,23273233             |                                |
|             | 37,03159   | 161,643654                  | 0,22909399             |                                |
| <b>20%</b>  | 57,71704   | 133,56735                   | 0,43211938             | 0,435549864                    |
|             | 48,17566   | 110,85153                   | 0,43459626             |                                |
|             | 53,58023   | 121,79153                   | 0,43993396             |                                |
| <b>30%</b>  | 73,5526    | 113,826                     | 0,64618453             | 0,648070624                    |
|             | 77,54283   | 117,23074                   | 0,66145475             |                                |
|             | 73,69028   | 115,761                     | 0,63657259             |                                |
| <b>40%</b>  | 93,78533   | 111,62705                   | 0,8401667              | 0,855068767                    |
|             | 85,34971   | 99,92532                    | 0,85413497             |                                |
|             | 86,00961   | 98,75893                    | 0,87090464             |                                |
| <b>50%</b>  | 91,2021    | 87,42583                    | 1,04319399             | 1,05813571                     |
|             | 83,19336   | 78,5564                     | 1,05902714             |                                |
|             | 95,51792   | 89,08708                    | 1,072186               |                                |
| <b>60%</b>  | 82,60355   | 65,15086                    | 1,26788119             | 1,256037406                    |
|             | 111,70008  | 88,51244                    | 1,26197041             |                                |
|             | 102,71461  | 82,95072                    | 1,23826062             |                                |
| <b>70%</b>  | 94,34582   | 67,49354                    | 1,39784963             | 1,41142912                     |
|             | 98,9976    | 69,67037                    | 1,42094265             |                                |
|             | 86,63808   | 61,20691                    | 1,41549508             |                                |
| <b>80%</b>  | 101,80565  | 62,20863                    | 1,63651972             | 1,642123458                    |
|             | 110,00319  | 64,96514                    | 1,69326488             |                                |
|             | 100,94099  | 63,22303                    | 1,59658577             |                                |
| <b>90%</b>  | 114,18093  | 61,95873                    | 1,84285459             | 1,894751525                    |
|             | 109,11241  | 57,9702                     | 1,88221552             |                                |
|             | 120,75216  | 61,63389                    | 1,95918447             |                                |
| <b>100%</b> | 136,52699  | 65,96317                    | 2,06974574             | 2,08542688                     |
|             | 138,47121  | 67,13167                    | 2,06268085             |                                |
|             | 140,62866  | 66,2139                     | 2,12385405             |                                |

Areas of peaks are given. <sup>a</sup> Mesitylene was used as internal standard. <sup>b</sup> Product/standard ratio.  
<sup>c</sup> Each calibration sample was measured three times.

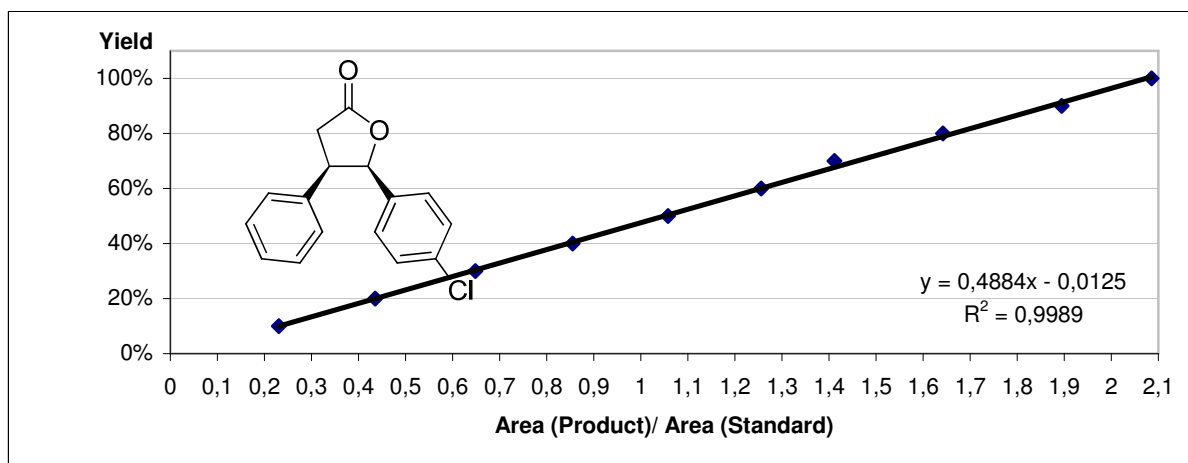

**Table 3** Calibration for *trans*-5-(4-Chlorophenyl)-4-phenyltetrahydrofuran-2-one (**11b**)

|            | <b>11b</b> | <b>Standard<sup>a</sup></b> | <b>P/S<sup>b</sup></b> | <b>average P/S<sup>c</sup></b> |
|------------|------------|-----------------------------|------------------------|--------------------------------|
| <b>5%</b>  | 16         | 209,32205                   | 0,0760015              | 0,077184829                    |
|            | 15,50672   | 201,23259                   | 0,07705869             |                                |
|            | 14,36544   | 183,01254                   | 0,07849429             |                                |
| <b>10%</b> | 28,03439   | 162,10942                   | 0,17293498             | 0,171974454                    |
|            | 18,57855   | 112,18476                   | 0,16560672             |                                |
|            | 21,25938   | 119,85106                   | 0,17738166             |                                |
| <b>15%</b> | 28,24328   | 103,68209                   | 0,27240269             | 0,268532809                    |
|            | 26,5931    | 101,96393                   | 0,2608089              |                                |
|            | 28,32006   | 103,97                      | 0,27238684             |                                |
| <b>20%</b> | 34,01339   | 96,0491                     | 0,35412503             | 0,350182681                    |
|            | 34,05926   | 98,04539                    | 0,34738257             |                                |
|            | 36,14874   | 103,56605                   | 0,34904044             |                                |
| <b>25%</b> | 42,81116   | 98,23946                    | 0,43578375             | 0,434753644                    |
|            | 38,43085   | 88,54968                    | 0,43400326             |                                |
|            | 38,83281   | 89,37892                    | 0,43447392             |                                |
| <b>30%</b> | 43,28186   | 81,90004                    | 0,52847178             | 0,521124714                    |
|            | 42,98491   | 81,70162                    | 0,52612066             |                                |
|            | 42,26732   | 83,07555                    | 0,50878171             |                                |
| <b>35%</b> | 44,83279   | 72,11813                    | 0,62165769             | 0,6106916                      |
|            | 44,95681   | 74,82277                    | 0,60084397             |                                |
|            | 49,043     | 80,45466                    | 0,60957314             |                                |
| <b>40%</b> | 49,18633   | 73,45325                    | 0,66962769             | 0,70629981                     |
|            | 52,27581   | 70,18405                    | 0,74483889             |                                |
|            | 52,0802    | 73,9321                     | 0,70443285             |                                |
| <b>45%</b> | 54,22944   | 66,0066                     | 0,82157602             | 0,797319406                    |
|            | 55,18089   | 69,7985                     | 0,79057415             |                                |
|            | 57,15249   | 73,29046                    | 0,77980804             |                                |
| <b>50%</b> | 52,71395   | 60,02415                    | 0,87821235             | 0,884759588                    |
|            | 51,82401   | 58,40738                    | 0,88728531             |                                |
|            | 56,49498   | 63,56456                    | 0,888781               |                                |
| <b>60%</b> | 57,45392   | 55,48422                    | 1,035500               | 1,0457116                      |
|            | 58,33465   | 55,22586                    | 1,056292               |                                |
|            | 57,45549   | 54,96333                    | 1,045342               |                                |

Areas of peaks are given. <sup>a</sup> Mesitylene was used as internal standard. <sup>b</sup> Product/standard ratio.  
<sup>c</sup> Each calibration sample was measured three times.



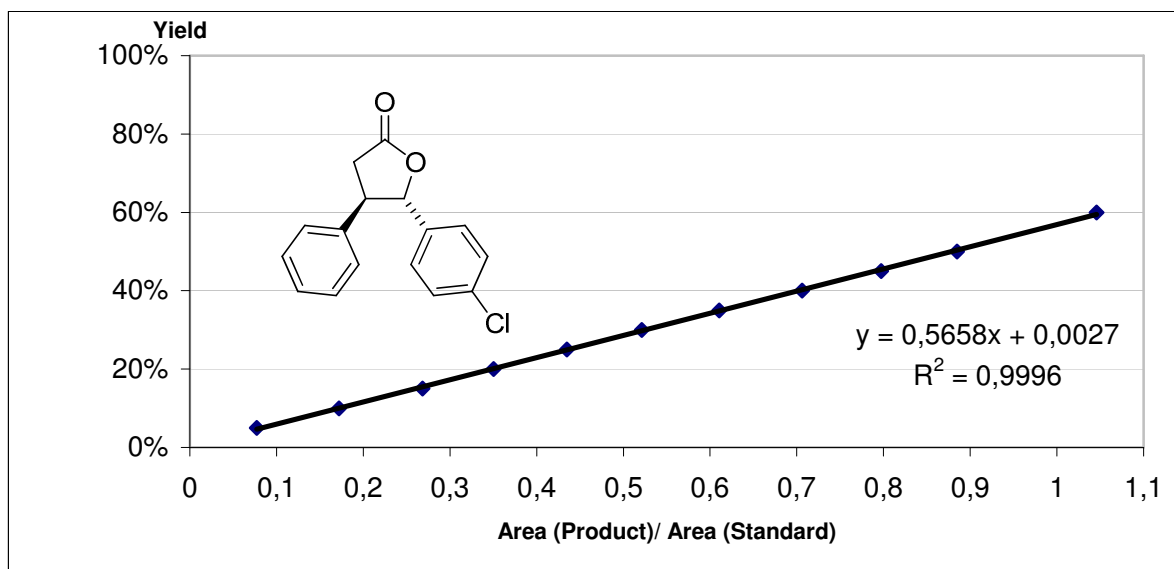

## 7. Single-crystal X-ray Analysis

Data sets were collected with a Nonius KappaCCD diffractometer, equipped with a rotating anode generator. Programs used: data collection COLLECT (Nonius B.V., 1998), data reduction Denzo-SMN (Z. Otwinowski, W. Minor, *Methods in Enzymology*, **1997**, 276, 307-326), absorption correction SORTAV (R. H. Blessing, *Acta Cryst.* **1995**, A51, 33-37; R. H. Blessing, *J. Appl. Cryst.* **1997**, 30, 421-426), and Denzo (Z. Otwinowski, D. Borek, W. Majewski, W. Minor, *Acta Cryst.* **2003**, A59, 228-234), structure solution SHELXS-97 (G.M. Sheldrick, *Acta Cryst.* **1990**, A46, 467-473), structure refinement SHELXL-97 (G.M. Sheldrick, Universität Göttingen, 1997), graphics SCHAKAL (E. Keller, Universität Freiburg, 2001).

## Single-crystal X-ray analysis of **8f**:

**Table 4.** Crystal data and structure refinement for **8f**.

|                                   |                                                                             |
|-----------------------------------|-----------------------------------------------------------------------------|
| Empirical formula                 | C <sub>31</sub> H <sub>35</sub> Cl Ir N <sub>2</sub> O <sub>2</sub>         |
| Formula weight                    | 695.26                                                                      |
| Temperature                       | 223(2) K                                                                    |
| Wavelength                        | 0.71073 Å                                                                   |
| Crystal system, space group       | monoclinic, P2 <sub>1</sub> /c (No.14)                                      |
| Unit cell dimensions              | a = 7.9293(1) Å<br>b = 19.9537(3) Å     β = 94.594(1)°.<br>c = 18.4870(3) Å |
| Volume                            | 2915.59(7) Å <sup>3</sup>                                                   |
| Z, Calculated density             | 4, 1.584 Mg/m <sup>3</sup>                                                  |
| Absorption coefficient            | 4.700 mm <sup>-1</sup>                                                      |
| F(000)                            | 1380                                                                        |
| Crystal size                      | 0.40 x 0.20 x 0.10 mm                                                       |
| Theta range for data collection   | 2.32 to 28.26°.                                                             |
| Limiting indices                  | -7<=h<=10, -26<=k<=24, -24<=l<=20                                           |
| Reflections collected / unique    | 20121 / 7105 [R(int) = 0.029]                                               |
| Completeness to theta = 28.26     | 98.3 %                                                                      |
| Max. and min. transmission        | 0.6507 and 0.2550                                                           |
| Refinement method                 | Full-matrix least-squares on F <sup>2</sup>                                 |
| Data / restraints / parameters    | 7105 / 0 / 337                                                              |
| Goodness-of-fit on F <sup>2</sup> | 1.026                                                                       |
| Final R indices [I>2σ(I)]         | R1 = 0.0263, wR <sup>2</sup> = 0.0627                                       |
| R indices (all data)              | R1 = 0.0357, wR <sup>2</sup> = 0.0672                                       |
| Largest diff. peak and hole       | 1.122 and -1.109 eÅ <sup>-3</sup>                                           |

**Table 5.** Atomic coordinates ( $\times 10^4$ ) and equivalent isotropic displacement parameters ( $\text{\AA}^2 \times 10^3$ ) for **8f**.  
U(eq) is defined as one third of the trace of the orthogonalized  $U_{ij}$  tensor.

|       | x        | y        | z        | U(eq) |
|-------|----------|----------|----------|-------|
| Ir(1) | 4764(1)  | 6836(1)  | 7210(1)  | 26(1) |
| Cl(2) | 2598(1)  | 7161(1)  | 6338(1)  | 51(1) |
| C(3)  | 3143(5)  | 6836(2)  | 7904(2)  | 39(1) |
| O(4)  | 2168(4)  | 6830(2)  | 8316(2)  | 64(1) |
| C(5)  | 6443(5)  | 6567(2)  | 7909(2)  | 39(1) |
| O(6)  | 7378(4)  | 6413(2)  | 8314(2)  | 62(1) |
| N(7)  | 7013(3)  | 7333(1)  | 6013(1)  | 25(1) |
| C(8)  | 6456(4)  | 6817(1)  | 6408(2)  | 24(1) |
| N(9)  | 7217(3)  | 6270(1)  | 6154(1)  | 25(1) |
| C(10) | 8248(3)  | 6436(2)  | 5599(2)  | 27(1) |
| C(11) | 8125(4)  | 7108(2)  | 5513(2)  | 28(1) |
| C(12) | 9296(4)  | 5922(2)  | 5257(2)  | 37(1) |
| C(13) | 9553(5)  | 6036(2)  | 4461(2)  | 45(1) |
| C(14) | 10417(5) | 6689(2)  | 4286(2)  | 48(1) |
| C(15) | 9302(5)  | 7308(2)  | 4297(2)  | 44(1) |
| C(16) | 9021(4)  | 7578(2)  | 5048(2)  | 36(1) |
| C(17) | 7010(4)  | 5599(1)  | 6426(2)  | 28(1) |
| C(18) | 8264(4)  | 5327(2)  | 6903(2)  | 33(1) |
| C(19) | 8026(5)  | 4681(2)  | 7155(2)  | 42(1) |
| C(20) | 6605(5)  | 4311(2)  | 6949(2)  | 46(1) |
| C(21) | 5384(4)  | 4600(2)  | 6468(2)  | 44(1) |
| C(22) | 5550(4)  | 5246(2)  | 6193(2)  | 33(1) |
| C(23) | 9863(4)  | 5703(2)  | 7147(2)  | 47(1) |
| C(24) | 6380(6)  | 3607(2)  | 7236(3)  | 72(1) |
| C(25) | 4217(4)  | 5546(2)  | 5667(2)  | 49(1) |
| C(26) | 6631(4)  | 8031(1)  | 6115(2)  | 28(1) |
| C(27) | 5488(4)  | 8355(2)  | 5622(2)  | 37(1) |
| C(28) | 5210(5)  | 9035(2)  | 5736(2)  | 50(1) |
| C(29) | 6031(5)  | 9383(2)  | 6310(2)  | 51(1) |
| C(30) | 7158(5)  | 9043(2)  | 6780(2)  | 44(1) |
| C(31) | 7494(4)  | 8368(2)  | 6696(2)  | 33(1) |
| C(32) | 4615(5)  | 7998(2)  | 4983(2)  | 52(1) |
| C(34) | 8773(5)  | 8018(2)  | 7211(2)  | 46(1) |
| C(33) | 5699(7)  | 10124(2) | 6413(3)  | 85(2) |
| C(41) | 10452(6) | 5571(2)  | 10366(2) | 91(2) |
| C(42) | 9926(6)  | 5601(2)  | 9668(2)  | 90(2) |
| C(43) | 9414(9)  | 5040(3)  | 9297(3)  | 97(2) |

**Table 6.** Bond lengths [Å] and angles [°] for **8f**.

---

|                   |            |
|-------------------|------------|
| Ir(1)-C(5)        | 1.859(4)   |
| Ir(1)-C(3)        | 1.887(4)   |
| Ir(1)-C(8)        | 2.079(3)   |
| Ir(1)-Cl(2)       | 2.3501(9)  |
| C(3)-O(4)         | 1.128(4)   |
| C(5)-O(6)         | 1.055(4)   |
| N(7)-C(8)         | 1.356(4)   |
| N(7)-C(11)        | 1.402(4)   |
| N(7)-C(26)        | 1.440(4)   |
| C(8)-N(9)         | 1.349(4)   |
| N(9)-C(10)        | 1.402(3)   |
| N(9)-C(17)        | 1.443(4)   |
| C(10)-C(11)       | 1.354(4)   |
| C(10)-C(12)       | 1.493(4)   |
| C(11)-C(16)       | 1.490(4)   |
| C(12)-C(13)       | 1.519(5)   |
| C(13)-C(14)       | 1.519(5)   |
| C(14)-C(15)       | 1.519(5)   |
| C(15)-C(16)       | 1.522(5)   |
| C(17)-C(18)       | 1.385(4)   |
| C(17)-C(22)       | 1.394(4)   |
| C(18)-C(19)       | 1.389(4)   |
| C(18)-C(23)       | 1.511(5)   |
| C(19)-C(20)       | 1.375(5)   |
| C(20)-C(21)       | 1.386(6)   |
| C(20)-C(24)       | 1.516(5)   |
| C(21)-C(22)       | 1.395(5)   |
| C(22)-C(25)       | 1.503(5)   |
| C(26)-C(27)       | 1.393(4)   |
| C(26)-C(31)       | 1.399(4)   |
| C(27)-C(28)       | 1.392(5)   |
| C(27)-C(32)       | 1.500(5)   |
| C(28)-C(29)       | 1.387(6)   |
| C(29)-C(30)       | 1.374(6)   |
| C(29)-C(33)       | 1.516(5)   |
| C(30)-C(31)       | 1.383(5)   |
| C(31)-C(34)       | 1.506(5)   |
| C(41)-C(42)       | 1.3258     |
| C(41)-C(43)#1     | 1.369(7)   |
| C(42)-C(43)       | 1.358(7)   |
| C(43)-C(41)#1     | 1.369(7)   |
|                   |            |
| C(5)-Ir(1)-C(3)   | 90.94(15)  |
| C(5)-Ir(1)-C(8)   | 91.37(13)  |
| C(3)-Ir(1)-C(8)   | 177.10(13) |
| C(5)-Ir(1)-Cl(2)  | 178.73(10) |
| C(3)-Ir(1)-Cl(2)  | 88.03(12)  |
| C(8)-Ir(1)-Cl(2)  | 89.64(8)   |
| O(4)-C(3)-Ir(1)   | 179.3(3)   |
| O(6)-C(5)-Ir(1)   | 178.9(3)   |
| C(8)-N(7)-C(11)   | 111.2(2)   |
| C(8)-N(7)-C(26)   | 125.6(2)   |
| C(11)-N(7)-C(26)  | 123.1(2)   |
| N(9)-C(8)-N(7)    | 104.7(2)   |
| N(9)-C(8)-Ir(1)   | 126.5(2)   |
| N(7)-C(8)-Ir(1)   | 128.8(2)   |
| C(8)-N(9)-C(10)   | 111.5(2)   |
| C(8)-N(9)-C(17)   | 124.3(2)   |
| C(10)-N(9)-C(17)  | 124.3(2)   |
| C(11)-C(10)-N(9)  | 106.3(2)   |
| C(11)-C(10)-C(12) | 132.0(3)   |
| N(9)-C(10)-C(12)  | 121.7(3)   |
| C(10)-C(11)-N(7)  | 106.4(2)   |
| C(10)-C(11)-C(16) | 131.2(3)   |
| N(7)-C(11)-C(16)  | 122.2(3)   |
| C(10)-C(12)-C(13) | 115.5(3)   |

**Table 6.** Bond lengths [Å] and angles [°] for **8f** (continued).

|                      |          |
|----------------------|----------|
| C(12)–C(13)–C(14)    | 115.6(3) |
| C(15)–C(14)–C(13)    | 114.9(3) |
| C(14)–C(15)–C(16)    | 115.3(3) |
| C(11)–C(16)–C(15)    | 114.5(3) |
| C(18)–C(17)–C(22)    | 122.3(3) |
| C(18)–C(17)–N(9)     | 119.2(3) |
| C(22)–C(17)–N(9)     | 118.5(3) |
| C(17)–C(18)–C(19)    | 117.9(3) |
| C(17)–C(18)–C(23)    | 122.6(3) |
| C(19)–C(18)–C(23)    | 119.6(3) |
| C(20)–C(19)–C(18)    | 122.4(3) |
| C(19)–C(20)–C(21)    | 117.9(3) |
| C(19)–C(20)–C(24)    | 121.2(4) |
| C(21)–C(20)–C(24)    | 120.9(4) |
| C(20)–C(21)–C(22)    | 122.5(3) |
| C(17)–C(22)–C(21)    | 117.1(3) |
| C(17)–C(22)–C(25)    | 121.4(3) |
| C(21)–C(22)–C(25)    | 121.5(3) |
| C(27)–C(26)–C(31)    | 122.1(3) |
| C(27)–C(26)–N(7)     | 119.7(3) |
| C(31)–C(26)–N(7)     | 118.1(3) |
| C(28)–C(27)–C(26)    | 117.1(3) |
| C(28)–C(27)–C(32)    | 120.9(3) |
| C(26)–C(27)–C(32)    | 122.0(3) |
| C(29)–C(28)–C(27)    | 122.3(3) |
| C(30)–C(29)–C(28)    | 118.5(3) |
| C(30)–C(29)–C(33)    | 120.9(4) |
| C(28)–C(29)–C(33)    | 120.6(4) |
| C(29)–C(30)–C(31)    | 122.1(3) |
| C(30)–C(31)–C(26)    | 117.9(3) |
| C(30)–C(31)–C(34)    | 120.4(3) |
| C(26)–C(31)–C(34)    | 121.7(3) |
| C(42)–C(41)–C(43) #1 | 119.4(3) |
| C(41)–C(42)–C(43)    | 120.8(3) |
| C(42)–C(43)–C(41) #1 | 119.6(4) |

---

Symmetry transformations used to generate equivalent atoms:  
#1 -x+2,-y+1,-z+2

**Table 7.** Anisotropic displacement parameters ( $\text{\AA}^2 \times 10^3$ ) for **8f**.  
 The anisotropic displacement factor exponent takes the form:  
 $-2 \pi^2 [ h^2 a^{*2} U_{11} + \dots + 2 h k a^* b^* U_{12} ]$

|       | U11    | U22   | U33    | U23    | U13   | U12   |
|-------|--------|-------|--------|--------|-------|-------|
| Ir(1) | 29(1)  | 22(1) | 27(1)  | -2(1)  | 8(1)  | 0(1)  |
| Cl(2) | 39(1)  | 63(1) | 50(1)  | 1(1)   | 4(1)  | 11(1) |
| C(3)  | 43(2)  | 38(2) | 38(2)  | -6(1)  | 14(2) | 0(1)  |
| O(4)  | 61(2)  | 82(2) | 53(2)  | -9(1)  | 35(2) | 0(1)  |
| C(5)  | 49(2)  | 28(2) | 43(2)  | 3(2)   | 17(2) | -5(2) |
| O(6)  | 62(2)  | 66(2) | 56(2)  | 4(2)   | -6(1) | -6(2) |
| N(7)  | 29(1)  | 20(1) | 26(1)  | 2(1)   | 7(1)  | 2(1)  |
| C(8)  | 24(1)  | 23(1) | 26(1)  | 1(1)   | 3(1)  | -1(1) |
| N(9)  | 27(1)  | 18(1) | 30(1)  | 1(1)   | 6(1)  | 2(1)  |
| C(10) | 26(1)  | 27(2) | 30(1)  | 0(1)   | 8(1)  | 0(1)  |
| C(11) | 29(1)  | 27(2) | 28(1)  | 2(1)   | 6(1)  | 2(1)  |
| C(12) | 41(2)  | 28(2) | 44(2)  | -1(1)  | 15(1) | 9(1)  |
| C(13) | 49(2)  | 43(2) | 46(2)  | -10(2) | 18(2) | 4(2)  |
| C(14) | 50(2)  | 53(2) | 44(2)  | 3(2)   | 24(2) | 7(2)  |
| C(15) | 51(2)  | 47(2) | 37(2)  | 10(2)  | 19(2) | 3(2)  |
| C(16) | 37(2)  | 32(2) | 41(2)  | 7(1)   | 14(1) | -1(1) |
| C(17) | 31(2)  | 21(1) | 35(2)  | -1(1)  | 10(1) | 1(1)  |
| C(18) | 35(2)  | 27(2) | 39(2)  | 3(1)   | 8(1)  | 3(1)  |
| C(19) | 45(2)  | 30(2) | 51(2)  | 13(2)  | 16(2) | 13(2) |
| C(20) | 47(2)  | 24(2) | 70(2)  | 4(2)   | 34(2) | 3(2)  |
| C(21) | 39(2)  | 28(2) | 68(2)  | -7(2)  | 23(2) | -9(1) |
| C(22) | 30(2)  | 26(2) | 46(2)  | -10(1) | 11(1) | -3(1) |
| C(23) | 37(2)  | 47(2) | 54(2)  | 11(2)  | -5(2) | -1(2) |
| C(24) | 72(3)  | 29(2) | 122(4) | 21(2)  | 49(3) | 4(2)  |
| C(25) | 36(2)  | 44(2) | 66(2)  | -17(2) | -7(2) | 0(2)  |
| C(26) | 32(2)  | 19(1) | 34(2)  | 3(1)   | 9(1)  | 1(1)  |
| C(27) | 40(2)  | 37(2) | 36(2)  | 10(1)  | 6(1)  | 6(1)  |
| C(28) | 54(2)  | 32(2) | 64(2)  | 18(2)  | 12(2) | 16(2) |
| C(29) | 59(2)  | 27(2) | 70(3)  | 0(2)   | 26(2) | 5(2)  |
| C(30) | 52(2)  | 27(2) | 56(2)  | -9(2)  | 15(2) | -8(2) |
| C(31) | 35(2)  | 28(2) | 38(2)  | -2(1)  | 10(1) | -6(1) |
| C(32) | 58(2)  | 58(2) | 39(2)  | 9(2)   | -6(2) | 9(2)  |
| C(34) | 43(2)  | 49(2) | 46(2)  | -3(2)  | -6(2) | -8(2) |
| C(33) | 109(4) | 21(2) | 128(5) | -3(2)  | 31(3) | 11(2) |
| C(41) | 125(5) | 69(4) | 78(4)  | -11(3) | -3(3) | 17(3) |
| C(42) | 136(5) | 63(4) | 73(4)  | 20(3)  | 19(3) | 24(3) |
| C(43) | 144(6) | 91(4) | 53(3)  | 3(3)   | -6(3) | 40(4) |

**Table 8.** Hydrogen coordinates (  $\times 10^4$ ) and isotropic displacement parameters ( $\text{\AA}^2 \times 10^3$ ) for **8f**.

|        | x     | y     | z     | U(eq) |
|--------|-------|-------|-------|-------|
| H(12A) | 8762  | 5483  | 5305  | 44    |
| H(12B) | 10409 | 5905  | 5528  | 44    |
| H(13A) | 8445  | 6022  | 4185  | 54    |
| H(13B) | 10226 | 5664  | 4291  | 54    |
| H(14A) | 11398 | 6753  | 4637  | 58    |
| H(14B) | 10839 | 6650  | 3804  | 58    |
| H(15A) | 8198  | 7201  | 4047  | 53    |
| H(15B) | 9811  | 7663  | 4020  | 53    |
| H(16A) | 10123 | 7689  | 5297  | 43    |
| H(16B) | 8366  | 7994  | 4993  | 43    |
| H(19)  | 8866  | 4490  | 7479  | 50    |
| H(21)  | 4409  | 4352  | 6322  | 53    |
| H(23A) | 10776 | 5555  | 6867  | 70    |
| H(23B) | 10157 | 5616  | 7658  | 70    |
| H(23C) | 9681  | 6180  | 7074  | 70    |
| H(24A) | 7329  | 3331  | 7119  | 108   |
| H(24B) | 5339  | 3417  | 7013  | 108   |
| H(24C) | 6330  | 3622  | 7758  | 108   |
| H(25A) | 3602  | 5888  | 5911  | 74    |
| H(25B) | 3439  | 5199  | 5486  | 74    |
| H(25C) | 4751  | 5746  | 5265  | 74    |
| H(28)  | 4438  | 9265  | 5413  | 60    |
| H(30)  | 7719  | 9276  | 7170  | 53    |
| H(32A) | 5319  | 8014  | 4578  | 78    |
| H(32B) | 3540  | 8214  | 4847  | 78    |
| H(32C) | 4420  | 7534  | 5112  | 78    |
| H(34A) | 9362  | 8346  | 7525  | 70    |
| H(34B) | 9582  | 7783  | 6936  | 70    |
| H(34C) | 8200  | 7699  | 7502  | 70    |
| H(33A) | 6610  | 10382 | 6230  | 127   |
| H(33B) | 5638  | 10218 | 6925  | 127   |
| H(33C) | 4636  | 10245 | 6149  | 127   |
| H(41)  | 10730 | 5965  | 10627 | 110   |
| H(42)  | 9907  | 6016  | 9427  | 108   |
| H(43)  | 8970  | 5071  | 8811  | 116   |



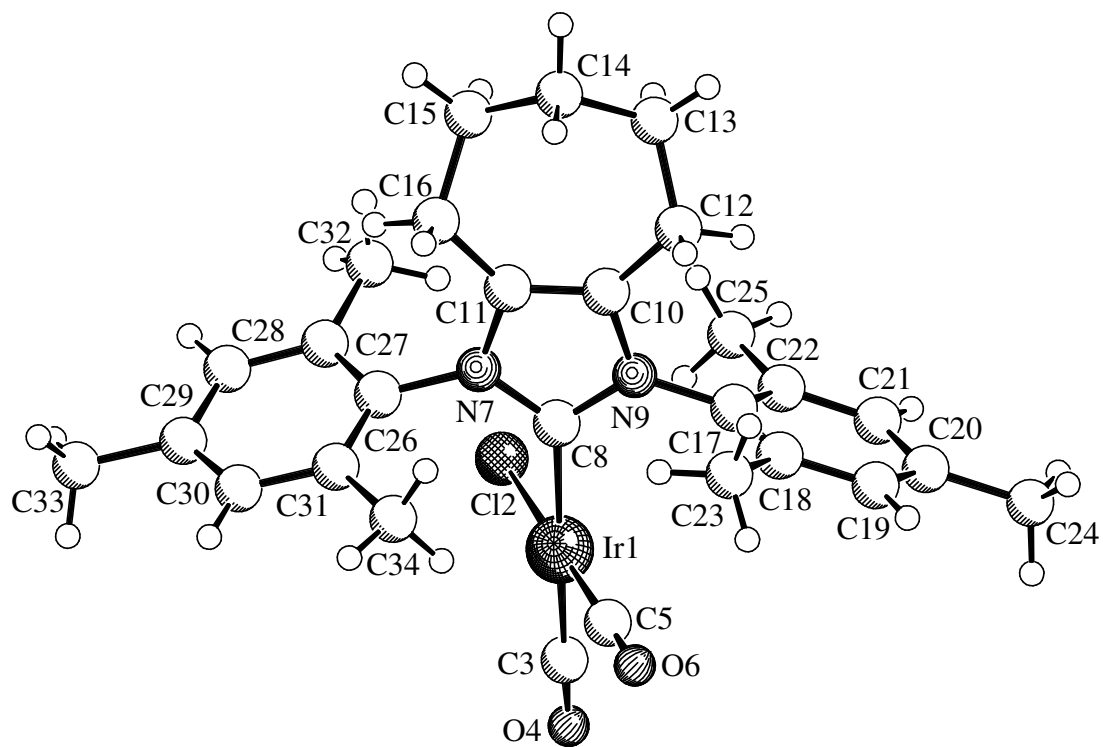

Single-crystal X-ray structure of **8f**

## Single-crystal X-ray analysis of **8h**:

**Table 9.** Crystal data and structure refinement for **8h**.

|                                   |                                                                     |
|-----------------------------------|---------------------------------------------------------------------|
| Empirical formula                 | C <sub>33</sub> H <sub>42</sub> Cl Ir N <sub>2</sub> O <sub>2</sub> |
| Formula weight                    | 726.34                                                              |
| Temperature                       | 223(2) K                                                            |
| Wavelength                        | 0.71073 Å                                                           |
| Crystal system, space group       | orthorhombic, Pnma (No. 62)                                         |
| Unit cell dimensions              | a = 19.4679(3) Å<br>b = 17.5361(2) Å<br>c = 9.5159(1) Å             |
| Volume                            | 3248.64(7) Å <sup>3</sup>                                           |
| Z, Calculated density             | 4, 1.485 Mg/m <sup>3</sup>                                          |
| Absorption coefficient            | 4.222 mm <sup>-1</sup>                                              |
| F(000)                            | 1456                                                                |
| Crystal size                      | 0.20 x 0.20 x 0.05 mm                                               |
| Theta range for data collection   | 2.09 to 28.28°.                                                     |
| Limiting indices                  | -25<=h<=18, -17<=k<=23, -9<=l<=12                                   |
| Reflections collected / unique    | 22070 / 4104 [R(int) = 0.043]                                       |
| Completeness to theta = 28.28     | 98.6 %                                                              |
| Absorption correction             | Semi-empirical from equivalents                                     |
| Max. and min. transmission        | 0.8167 and 0.4856                                                   |
| Refinement method                 | Full-matrix least-squares on F <sup>2</sup>                         |
| Data / restraints / parameters    | 4104 / 0 / 210                                                      |
| Goodness-of-fit on F <sup>2</sup> | 1.030                                                               |
| Final R indices [I>2σ(I)]         | R1 = 0.0334, wR <sup>2</sup> = 0.0708                               |
| R indices (all data)              | R1 = 0.0469, wR <sup>2</sup> = 0.0774                               |
| Largest diff. peak and hole       | 1.878 and -2.281 eÅ <sup>-3</sup>                                   |

**Table 10.** Atomic coordinates ( $\times 10^4$ ) and equivalent isotropic displacement parameters ( $\text{\AA}^2 \times 10^3$ ) for **8h**.  
U(eq) is defined as one third of the trace of the orthogonalized  $U_{ij}$  tensor.

|        | x        | y        | z         | U(eq)  |
|--------|----------|----------|-----------|--------|
| Ir(1)  | 9624(1)  | 2500     | 1051(1)   | 34(1)  |
| Cl(2)  | 10516(1) | 2500     | -558(2)   | 55(1)  |
| C(3)   | 10292(4) | 2500     | 2493(8)   | 69(2)  |
| O(4)   | 10688(4) | 2500     | 3343(7)   | 118(3) |
| C(5)   | 8932(4)  | 2500     | 2348(6)   | 50(2)  |
| O(6)   | 8514(3)  | 2500     | 3183(5)   | 76(2)  |
| N(7)   | 8633(2)  | 1889(2)  | -1235(3)  | 27(1)  |
| C(8)   | 8922(2)  | 2500     | -619(5)   | 25(1)  |
| C(9)   | 8145(2)  | 2118(2)  | -2224(3)  | 29(1)  |
| C(10A) | 7622(14) | 1676(15) | -2970(30) | 32(4)  |
| C(11A) | 7333(10) | 2146(10) | -4142(18) | 41(3)  |
| C(10B) | 7754(15) | 1581(17) | -3210(30) | 33(4)  |
| C(11B) | 7128(10) | 2064(10) | -3700(30) | 53(5)  |
| C(12)  | 8810(2)  | 1094(2)  | -1041(4)  | 31(1)  |
| C(13)  | 9298(2)  | 776(2)   | -1933(4)  | 39(1)  |
| C(14)  | 9427(3)  | -8(2)    | -1789(5)  | 55(1)  |
| C(15)  | 9074(3)  | -438(2)  | -818(5)   | 64(1)  |
| C(16)  | 8598(3)  | -109(2)  | 28(5)     | 57(1)  |
| C(17)  | 8447(2)  | 668(2)   | -43(4)    | 40(1)  |
| C(18)  | 9682(2)  | 1224(2)  | -3060(5)  | 47(1)  |
| C(19)  | 9376(3)  | 1076(4)  | -4513(5)  | 88(2)  |
| C(20)  | 10454(3) | 1064(3)  | -3081(6)  | 68(1)  |
| C(21)  | 7914(3)  | 1006(3)  | 931(4)    | 51(1)  |
| C(22)  | 8047(3)  | 782(3)   | 2470(5)   | 78(2)  |
| C(23)  | 7179(3)  | 776(4)   | 524(7)    | 86(2)  |

**Table 11.** Bond lengths [Å] and angles [°] for **8h**.

---

|                  |            |
|------------------|------------|
| Ir(1)-C(5)       | 1.828(7)   |
| Ir(1)-C(3)       | 1.890(7)   |
| Ir(1)-C(8)       | 2.096(5)   |
| Ir(1)-Cl(2)      | 2.3147(17) |
| C(3)-O(4)        | 1.119(8)   |
| C(5)-O(6)        | 1.138(8)   |
| N(7)-C(8)        | 1.346(4)   |
| N(7)-C(9)        | 1.396(4)   |
| N(7)-C(12)       | 1.448(4)   |
| C(8)-N(7)#1      | 1.346(4)   |
| C(9)-C(9)#1      | 1.339(6)   |
| C(9)-C(10A)      | 1.46(3)    |
| C(9)-C(10B)      | 1.54(3)    |
| C(10A)-C(11A)    | 1.50(4)    |
| C(10A)-H(10A)    | 0.9800     |
| C(10A)-H(10B)    | 0.9800     |
| C(11A)-C(11A)#1  | 1.24(4)    |
| C(11A)-H(11A)    | 0.9800     |
| C(11A)-H(11B)    | 0.9800     |
| C(10B)-C(11B)    | 1.55(3)    |
| C(10B)-H(10C)    | 0.9800     |
| C(10B)-H(10D)    | 0.9800     |
| C(11B)-C(11B)#1  | 1.53(3)    |
| C(11B)-H(11C)    | 0.9800     |
| C(11B)-H(11D)    | 0.9800     |
| C(12)-C(13)      | 1.391(5)   |
| C(12)-C(17)      | 1.399(5)   |
| C(13)-C(14)      | 1.404(5)   |
| C(13)-C(18)      | 1.526(6)   |
| C(14)-C(15)      | 1.375(7)   |
| C(14)-H(14)      | 0.9400     |
| C(15)-C(16)      | 1.357(7)   |
| C(15)-H(15)      | 0.9400     |
| C(16)-C(17)      | 1.396(5)   |
| C(16)-H(16)      | 0.9400     |
| C(17)-C(21)      | 1.513(6)   |
| C(18)-C(19)      | 1.527(7)   |
| C(18)-C(20)      | 1.529(6)   |
| C(18)-H(18)      | 0.9900     |
| C(19)-H(19A)     | 0.9700     |
| C(19)-H(19B)     | 0.9700     |
| C(19)-H(19C)     | 0.9700     |
| C(20)-H(20A)     | 0.9700     |
| C(20)-H(20B)     | 0.9700     |
| C(20)-H(20C)     | 0.9700     |
| C(21)-C(23)      | 1.537(7)   |
| C(21)-C(22)      | 1.538(6)   |
| C(21)-H(21)      | 0.9900     |
| C(22)-H(22A)     | 0.9700     |
| C(22)-H(22B)     | 0.9700     |
| C(22)-H(22C)     | 0.9700     |
| C(23)-H(23A)     | 0.9700     |
| C(23)-H(23B)     | 0.9700     |
| C(23)-H(23C)     | 0.9700     |
|                  |            |
| C(5)-Ir(1)-C(3)  | 90.9(3)    |
| C(5)-Ir(1)-C(8)  | 91.8(2)    |
| C(3)-Ir(1)-C(8)  | 177.3(3)   |
| C(5)-Ir(1)-Cl(2) | 178.90(19) |
| C(3)-Ir(1)-Cl(2) | 88.0(3)    |
| C(8)-Ir(1)-Cl(2) | 89.31(14)  |
| O(4)-C(3)-Ir(1)  | 179.8(9)   |
| O(6)-C(5)-Ir(1)  | 178.2(6)   |
| C(8)-N(7)-C(9)   | 110.4(3)   |
| C(8)-N(7)-C(12)  | 127.8(3)   |
| C(9)-N(7)-C(12)  | 121.7(3)   |

**Table 11.** Bond lengths [Å] and angles [°] for **8h**. (Continued)

|                        |            |
|------------------------|------------|
| N(7)-C(8)-N(7)#1       | 105.7(4)   |
| N(7)-C(8)-Ir(1)        | 127.10(19) |
| N(7)#1-C(8)-Ir(1)      | 127.10(19) |
| C(9)#1-C(9)-N(7)       | 106.76(17) |
| C(9)#1-C(9)-C(10A)     | 122.0(11)  |
| N(7)-C(9)-C(10A)       | 130.3(12)  |
| C(9)#1-C(9)-C(10B)     | 127.9(12)  |
| N(7)-C(9)-C(10B)       | 125.1(12)  |
| C(10A)-C(9)-C(10B)     | 14.5(12)   |
| C(9)-C(10A)-C(11A)     | 109(2)     |
| C(9)-C(10A)-H(10A)     | 109.8      |
| C(11A)-C(10A)-H(10A)   | 109.8      |
| C(9)-C(10A)-H(10B)     | 109.8      |
| C(11A)-C(10A)-H(10B)   | 109.8      |
| H(10A)-C(10A)-H(10B)   | 108.2      |
| C(11A)#1-C(11A)-C(10A) | 123.3(12)  |
| C(11A)#1-C(11A)-H(11A) | 106.5      |
| C(10A)-C(11A)-H(11A)   | 106.5      |
| C(11A)#1-C(11A)-H(11B) | 106.5      |
| C(10A)-C(11A)-H(11B)   | 106.5      |
| H(11A)-C(11A)-H(11B)   | 106.5      |
| C(9)-C(10B)-C(11B)     | 103.6(18)  |
| C(9)-C(10B)-H(10C)     | 111.0      |
| C(11B)-C(10B)-H(10C)   | 111.0      |
| C(9)-C(10B)-H(10D)     | 111.0      |
| C(11B)-C(10B)-H(10D)   | 111.0      |
| H(10C)-C(10B)-H(10D)   | 109.0      |
| C(11B)#1-C(11B)-C(10B) | 123.0(13)  |
| C(11B)#1-C(11B)-H(11C) | 106.6      |
| C(10B)-C(11B)-H(11C)   | 106.6      |
| C(11B)#1-C(11B)-H(11D) | 106.6      |
| C(10B)-C(11B)-H(11D)   | 106.6      |
| H(11C)-C(11B)-H(11D)   | 106.5      |
| C(13)-C(12)-C(17)      | 123.1(3)   |
| C(13)-C(12)-N(7)       | 118.1(3)   |
| C(17)-C(12)-N(7)       | 118.6(3)   |
| C(12)-C(13)-C(14)      | 117.1(4)   |
| C(12)-C(13)-C(18)      | 123.8(3)   |
| C(14)-C(13)-C(18)      | 119.1(4)   |
| C(15)-C(14)-C(13)      | 120.9(4)   |
| C(15)-C(14)-H(14)      | 119.6      |
| C(13)-C(14)-H(14)      | 119.6      |
| C(16)-C(15)-C(14)      | 120.4(4)   |
| C(16)-C(15)-H(15)      | 119.8      |
| C(14)-C(15)-H(15)      | 119.8      |
| C(15)-C(16)-C(17)      | 122.0(4)   |
| C(15)-C(16)-H(16)      | 119.0      |
| C(17)-C(16)-H(16)      | 119.0      |
| C(16)-C(17)-C(12)      | 116.5(4)   |
| C(16)-C(17)-C(21)      | 119.8(4)   |
| C(12)-C(17)-C(21)      | 123.6(3)   |
| C(19)-C(18)-C(13)      | 111.0(4)   |
| C(19)-C(18)-C(20)      | 109.9(4)   |
| C(13)-C(18)-C(20)      | 113.3(4)   |
| C(19)-C(18)-H(18)      | 107.5      |
| C(13)-C(18)-H(18)      | 107.5      |
| C(20)-C(18)-H(18)      | 107.5      |
| C(18)-C(19)-H(19A)     | 109.5      |
| C(18)-C(19)-H(19B)     | 109.5      |
| H(19A)-C(19)-H(19B)    | 109.5      |
| C(18)-C(19)-H(19C)     | 109.5      |
| H(19A)-C(19)-H(19C)    | 109.5      |
| H(19B)-C(19)-H(19C)    | 109.5      |
| C(18)-C(20)-H(20A)     | 109.5      |
| C(18)-C(20)-H(20B)     | 109.5      |
| H(20A)-C(20)-H(20B)    | 109.5      |
| C(18)-C(20)-H(20C)     | 109.5      |
| H(20A)-C(20)-H(20C)    | 109.5      |
| H(20B)-C(20)-H(20C)    | 109.5      |

**Table 11.** Bond lengths [Å] and angles [°] for **8h**. (Continued)

|                     |          |
|---------------------|----------|
| C(17)–C(21)–C(23)   | 112.4(4) |
| C(17)–C(21)–C(22)   | 111.6(4) |
| C(23)–C(21)–C(22)   | 109.3(4) |
| C(17)–C(21)–H(21)   | 107.8    |
| C(23)–C(21)–H(21)   | 107.8    |
| C(22)–C(21)–H(21)   | 107.8    |
| C(21)–C(22)–H(22A)  | 109.5    |
| C(21)–C(22)–H(22B)  | 109.5    |
| H(22A)–C(22)–H(22B) | 109.5    |
| C(21)–C(22)–H(22C)  | 109.5    |
| H(22A)–C(22)–H(22C) | 109.5    |
| H(22B)–C(22)–H(22C) | 109.5    |
| C(21)–C(23)–H(23A)  | 109.5    |
| C(21)–C(23)–H(23B)  | 109.5    |
| H(23A)–C(23)–H(23B) | 109.5    |
| C(21)–C(23)–H(23C)  | 109.5    |
| H(23A)–C(23)–H(23C) | 109.5    |
| H(23B)–C(23)–H(23C) | 109.5    |

---

Symmetry transformations used to generate equivalent atoms:  
#1  $x, -y+1/2, z$

**Table 12.** Anisotropic displacement parameters ( $\text{\AA}^2 \times 10^3$ ) for **8h**.  
 The anisotropic displacement factor exponent takes the form:  
 $-2 \pi^2 [ h^2 a^{*2} U_{11} + \dots + 2 h k a^* b^* U_{12} ]$

|        | U11    | U22    | U33    | U23    | U13    | U12    |
|--------|--------|--------|--------|--------|--------|--------|
| Ir(1)  | 36(1)  | 30(1)  | 36(1)  | 0      | -10(1) | 0      |
| Cl(2)  | 33(1)  | 58(1)  | 76(1)  | 0      | 5(1)   | 0      |
| C(3)   | 69(5)  | 77(5)  | 61(4)  | 0      | -25(4) | 0      |
| O(4)   | 97(5)  | 165(7) | 92(5)  | 0      | -67(4) | 0      |
| C(5)   | 64(4)  | 50(4)  | 36(3)  | 0      | -11(3) | 0      |
| O(6)   | 85(4)  | 97(4)  | 46(3)  | 0      | 23(3)  | 0      |
| N(7)   | 32(2)  | 19(1)  | 31(2)  | 0(1)   | -8(1)  | -1(1)  |
| C(8)   | 24(2)  | 23(2)  | 27(2)  | 0      | -1(2)  | 0      |
| C(9)   | 33(2)  | 22(2)  | 33(2)  | 1(1)   | -7(1)  | -1(1)  |
| C(10A) | 34(9)  | 20(8)  | 43(8)  | -12(6) | -6(5)  | 2(6)   |
| C(11A) | 40(8)  | 34(6)  | 50(8)  | -6(5)  | -20(5) | -3(5)  |
| C(10B) | 37(10) | 17(6)  | 46(10) | -13(7) | -12(6) | 9(6)   |
| C(11B) | 35(8)  | 29(5)  | 94(15) | 12(7)  | -32(7) | -10(5) |
| C(12)  | 43(2)  | 17(1)  | 34(2)  | -1(1)  | -12(2) | 2(1)   |
| C(13)  | 51(2)  | 26(2)  | 39(2)  | -2(2)  | -11(2) | 6(2)   |
| C(14)  | 76(3)  | 31(2)  | 57(3)  | -7(2)  | -9(2)  | 17(2)  |
| C(15)  | 95(4)  | 22(2)  | 74(3)  | 5(2)   | -8(3)  | 13(2)  |
| C(16)  | 83(4)  | 27(2)  | 61(3)  | 15(2)  | -9(3)  | -4(2)  |
| C(17)  | 52(2)  | 27(2)  | 40(2)  | 4(2)   | -10(2) | -4(2)  |
| C(18)  | 53(3)  | 40(2)  | 47(2)  | 0(2)   | 3(2)   | 12(2)  |
| C(19)  | 92(4)  | 130(6) | 43(3)  | 17(3)  | -8(3)  | 2(4)   |
| C(20)  | 60(3)  | 74(4)  | 69(3)  | -9(3)  | 6(3)   | 16(3)  |
| C(21)  | 66(3)  | 41(2)  | 46(2)  | 5(2)   | 2(2)   | -9(2)  |
| C(22)  | 120(5) | 67(3)  | 46(3)  | 11(2)  | 8(3)   | -11(3) |
| C(23)  | 64(4)  | 105(5) | 90(4)  | -11(4) | 0(3)   | -15(4) |

**Table 13.** Hydrogen coordinates (  $\times 10^4$ ) and isotropic displacement parameters ( $\text{\AA}^2 \times 10^3$ ) for **8h**.

|        | x     | y    | z     | U(eq) |
|--------|-------|------|-------|-------|
| H(10A) | 7255  | 1532 | -2316 | 39    |
| H(10B) | 7827  | 1208 | -3346 | 39    |
| H(11A) | 7573  | 1987 | -4998 | 50    |
| H(11B) | 6853  | 1987 | -4254 | 50    |
| H(10C) | 7605  | 1119 | -2721 | 40    |
| H(10D) | 8040  | 1434 | -4018 | 40    |
| H(11C) | 7022  | 1904 | -4659 | 63    |
| H(11D) | 6739  | 1904 | -3113 | 63    |
| H(14)  | 9758  | -242 | -2363 | 66    |
| H(15)  | 9164  | -963 | -741  | 76    |
| H(16)  | 8362  | -414 | 681   | 68    |
| H(18)  | 9620  | 1773 | -2851 | 56    |
| H(19A) | 9390  | 534  | -4712 | 133   |
| H(19B) | 9641  | 1349 | -5215 | 133   |
| H(19C) | 8904  | 1252 | -4533 | 133   |
| H(20A) | 10640 | 1134 | -2144 | 101   |
| H(20B) | 10678 | 1413 | -3725 | 101   |
| H(20C) | 10533 | 544  | -3386 | 101   |
| H(21)  | 7947  | 1568 | 864   | 61    |
| H(22A) | 7960  | 241  | 2591  | 117   |
| H(22B) | 7744  | 1071 | 3079  | 117   |
| H(22C) | 8521  | 892  | 2709  | 117   |
| H(23A) | 7069  | 983  | -395  | 129   |
| H(23B) | 6858  | 975  | 1213  | 129   |
| H(23C) | 7144  | 224  | 496   | 129   |



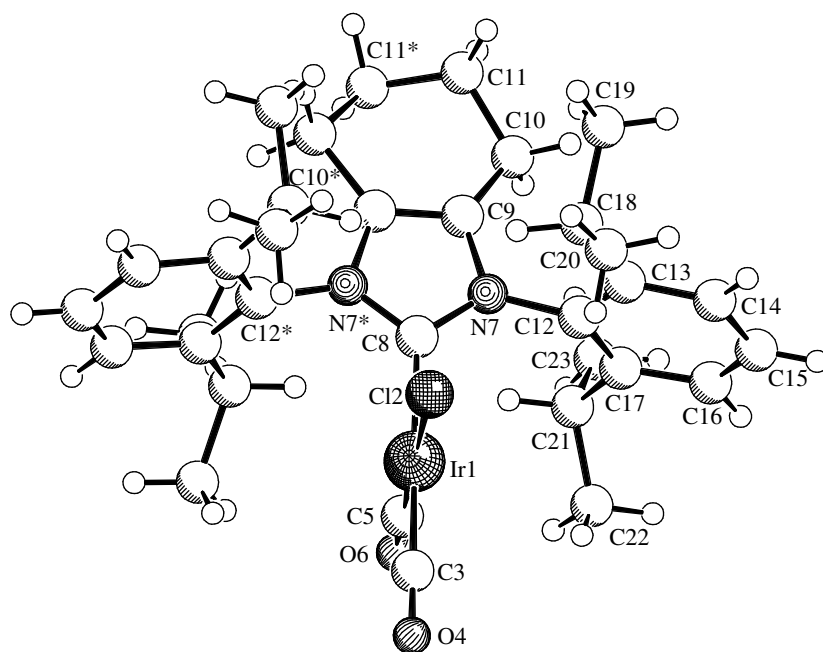

SCHAKAL

Single-crystal X-ray structure of **8h**.

## 8. Calculation of the Buried Volume using SambVa (Web Application)<sup>3,4</sup>

The buried volume ( $\%V_{\text{Bur}}$ ; the fraction of the space buried by the NHC ligand of a sphere around the metal) of the NHC-ligands was calculated using the web application SambVca developed by Cavallo et al. for the calculation of the buried volume of any type of ligands. As an input file for this computer program, only the coordinates of the ligand must be supplied. This program positions the putative metal atom at 2.10 Å from the coordinating atom of the ligand; a value of 3.5 Å is taken for the radius of the sphere around this metal atom. For our calculations of the buried volumes, we took the coordinates from the crystal structure analyses of the [(NHC)Ir(CO)<sub>2</sub>Cl] complex **8f** and **8h**.

## Calculation of the Buried Volume of Ligand 1f from complex 8f

### SambVca @ MoLNaC Results page

```
|
|           S A M B V C A
|
|           Buried Volume in Salerno
|
|           http://www.molnac.unisa.it/OM-tools/SambVca
|
|           L. Cavallo et al. email: lcavallo@unisa.it
|
```

#### Molecule from input :

```
Molecule from input :
./temp/752e429f6b2dfd68d8badd2e92c73971.cif
```

```
Number of atoms           :    60
Atom that is coordinated   :     1
Atoms that define the axis :     2
ID of these atoms         :     2   3

Radius of sphere (Angs)   :     3.500
Distance from sphere (Angs) :    2.100
Mesh step (Angs)         :     0.050
H atoms omitted in the V_bur calculation
```

#### Cartesian coordinates from input :

```
Cartesian coordinates from input :
C      -4.17039   13.60224   11.80749
N      -4.67047   14.63205   11.08052
N      -4.81130   12.51037   11.34090
C      -5.71107   12.84180   10.31725
C      -5.62627   14.18349   10.15877
C      -6.59273   11.81578    9.68665
H      -6.16214   10.94061    9.77584
H      -7.43507   11.78266   10.18678
C      -6.91439   12.04365    8.21963
H      -6.07662   12.01612    7.71195
H      -7.47313   11.30177    7.90729
C      -7.62532   13.34703    7.89807
H      -8.35121   13.47473    8.54488
```

|   |          |          |          |
|---|----------|----------|----------|
| H | -8.03131 | 13.26921 | 7.00986  |
| C | -6.73954 | 14.58156 | 7.91871  |
| H | -5.90120 | 14.36866 | 7.45765  |
| H | -7.18419 | 15.29052 | 7.40790  |
| C | -6.40556 | 15.12071 | 9.30226  |
| H | -7.24250 | 15.34240 | 9.76110  |
| H | -5.89433 | 15.95099 | 9.20090  |
| C | -4.60694 | 11.17227 | 11.84158 |
| C | -5.53067 | 10.62993 | 12.72021 |
| C | -5.30458 | 9.34052  | 13.18532 |
| H | -5.92270 | 8.95921  | 13.78201 |
| C | -4.20836 | 8.60124  | 12.80534 |
| C | -3.31141 | 9.17830  | 11.91897 |
| H | -2.55992 | 8.68385  | 11.64993 |
| C | -3.48370 | 10.46671 | 11.41295 |
| C | -6.76236 | 11.37959 | 13.17076 |
| H | -7.52781 | 11.08428 | 12.65424 |
| H | -6.91986 | 11.20600 | 14.11186 |
| H | -6.62890 | 12.33138 | 13.03569 |
| C | -3.98745 | 7.19730  | 13.33421 |
| H | -4.75727 | 6.64658  | 13.11861 |
| H | -3.19503 | 6.81818  | 12.92328 |
| H | -3.87051 | 7.22723  | 14.29614 |
| C | -2.50467 | 11.06652 | 10.44292 |
| H | -1.98089 | 11.74874 | 10.89256 |
| H | -1.91457 | 10.37393 | 10.10938 |
| H | -2.98762 | 11.46539 | 9.70213  |
| C | -4.35247 | 16.02382 | 11.26848 |
| C | -3.51922 | 16.67151 | 10.35908 |
| C | -3.28183 | 18.02717 | 10.57007 |
| H | -2.71751 | 18.48710 | 9.97486  |
| C | -3.84783 | 18.72256 | 11.62782 |
| C | -4.67187 | 18.04313 | 12.49392 |
| H | -5.05896 | 18.50905 | 13.21259 |
| C | -4.95075 | 16.69725 | 12.33894 |
| C | -2.92153 | 15.95897 | 9.18248  |
| H | -3.53973 | 15.99089 | 8.43616  |
| H | -2.08927 | 16.38997 | 8.93186  |
| H | -2.74781 | 15.03312 | 9.42019  |
| C | -5.88864 | 15.99888 | 13.28815 |
| H | -6.30918 | 16.65336 | 13.86677 |
| H | -6.57084 | 15.52996 | 12.78139 |
| H | -5.39120 | 15.36235 | 13.82439 |
| C | -3.56933 | 20.20112 | 11.81762 |
| H | -4.31879 | 20.71593 | 11.48040 |
| H | -3.44515 | 20.38869 | 12.76112 |
| H | -2.76554 | 20.44256 | 11.33113 |

### Atoms and radius in the parameter file

| Atoms and radius in the parameter file |      |
|----------------------------------------|------|
| C2                                     | 1.99 |
| C3                                     | 1.99 |
| C                                      | 1.99 |
| N2                                     | 1.81 |
| N3                                     | 1.81 |
| N                                      | 1.81 |
| O                                      | 1.78 |
| P                                      | 2.11 |
| H                                      | 1.40 |

F 1.72

## Coordinates scaled to put the metal at the origin

Coordinates scaled to put the metal at the origin

|   |          |          |          |
|---|----------|----------|----------|
| C | -1.45009 | -0.07887 | -1.51691 |
| N | -1.95017 | 0.95094  | -2.24388 |
| N | -2.09100 | -1.17074 | -1.98350 |
| C | -2.99077 | -0.83931 | -3.00715 |
| C | -2.90597 | 0.50238  | -3.16563 |
| C | -3.87243 | -1.86533 | -3.63775 |
| H | -3.44184 | -2.74050 | -3.54856 |
| H | -4.71477 | -1.89845 | -3.13762 |
| C | -4.19409 | -1.63746 | -5.10477 |
| H | -3.35632 | -1.66499 | -5.61245 |
| H | -4.75283 | -2.37934 | -5.41711 |
| C | -4.90502 | -0.33408 | -5.42633 |
| H | -5.63091 | -0.20638 | -4.77952 |
| H | -5.31101 | -0.41190 | -6.31454 |
| C | -4.01924 | 0.90045  | -5.40569 |
| H | -3.18090 | 0.68755  | -5.86675 |
| H | -4.46389 | 1.60941  | -5.91650 |
| C | -3.68526 | 1.43960  | -4.02214 |
| H | -4.52220 | 1.66129  | -3.56330 |
| H | -3.17403 | 2.26988  | -4.12350 |
| C | -1.88664 | -2.50884 | -1.48282 |
| C | -2.81037 | -3.05118 | -0.60419 |
| C | -2.58428 | -4.34059 | -0.13908 |
| H | -3.20240 | -4.72190 | 0.45761  |
| C | -1.48806 | -5.07987 | -0.51906 |
| C | -0.59111 | -4.50281 | -1.40543 |
| H | 0.16038  | -4.99726 | -1.67447 |
| C | -0.76340 | -3.21440 | -1.91145 |
| C | -4.04206 | -2.30152 | -0.15364 |
| H | -4.80751 | -2.59683 | -0.67016 |
| H | -4.19956 | -2.47511 | 0.78746  |
| H | -3.90860 | -1.34973 | -0.28871 |
| C | -1.26715 | -6.48381 | 0.00981  |
| H | -2.03697 | -7.03453 | -0.20579 |
| H | -0.47473 | -6.86293 | -0.40112 |
| H | -1.15021 | -6.45388 | 0.97174  |
| C | 0.21563  | -2.61459 | -2.88148 |
| H | 0.73941  | -1.93237 | -2.43184 |
| H | 0.80573  | -3.30718 | -3.21502 |
| H | -0.26732 | -2.21572 | -3.62227 |
| C | -1.63217 | 2.34271  | -2.05592 |
| C | -0.79892 | 2.99040  | -2.96532 |
| C | -0.56153 | 4.34606  | -2.75433 |
| H | 0.00279  | 4.80599  | -3.34954 |
| C | -1.12753 | 5.04145  | -1.69658 |
| C | -1.95157 | 4.36202  | -0.83048 |
| H | -2.33866 | 4.82794  | -0.11181 |
| C | -2.23045 | 3.01614  | -0.98546 |
| C | -0.20123 | 2.27786  | -4.14192 |
| H | -0.81943 | 2.30978  | -4.88824 |
| H | 0.63103  | 2.70886  | -4.39254 |

|    |          |         |          |
|----|----------|---------|----------|
| H  | -0.02751 | 1.35201 | -3.90421 |
| C  | -3.16834 | 2.31777 | -0.03625 |
| H  | -3.58888 | 2.97225 | 0.54237  |
| H  | -3.85054 | 1.84885 | -0.54301 |
| H  | -2.67090 | 1.68124 | 0.49999  |
| C  | -0.84903 | 6.52001 | -1.50678 |
| H  | -1.59849 | 7.03482 | -1.84400 |
| H  | -0.72485 | 6.70758 | -0.56328 |
| H  | -0.04524 | 6.76145 | -1.99327 |
| XX | 0.00000  | 0.00000 | 0.00000  |

### Results : Volumes in Angs^3

Results : Volumes in Angs^3

|                        |           |
|------------------------|-----------|
| N of voxels examined : | 1436277   |
| Volume of voxel :      | 0.125E-03 |

|         |          |         |         |
|---------|----------|---------|---------|
| V Free  | V Buried | V Total | V Exact |
| 119.651 | 59.884   | 179.535 | 179.594 |

|         |        |          |
|---------|--------|----------|
| %V_Free | %V_Bur | % Tot/Ex |
| 66.645  | 33.355 | 99.967   |

**The %V\_Bur of your molecule is: 33.4**

## Calculation of the Buried Volume of ligand 1h from complex 8h

# SambVca @ MoLNaC

## Results page

```
-----  
|                                     |  
|               S A M B V C A       |  
|                                     |  
|           Buried Volume in Salerno |  
|                                     |  
| http://www.molnac.unisa.it/OM-tools/SambVca |  
|                                     |  
|           L. Cavallo et al. email: lcavallo@unisa.it |  
|                                     |  
|-----|
```

### Molecule from input :

Molecule from input :

./temp/752e429f6b2dfd68d8badd2e92c73971.cif

```
Number of atoms           :    75  
Atom that is coordinated   :     1  
Atoms that define the axis :     2  
ID of these atoms         :     2   3  
  
Radius of sphere (Angs)   :    3.500  
Distance from sphere (Angs) :    2.100  
Mesh step (Angs)         :    0.050  
H atoms omitted in the V_bur calculation
```

### Cartesian coordinates from input :

```
Cartesian coordinates from input :  
C    -17.36926    4.38403   -0.58903  
N    -16.80644    3.31169   -1.17521  
N    -16.80644    5.45636   -1.17521  
C    -15.85660    3.71432   -2.11634  
C    -15.85660    5.05373   -2.11634  
C    -14.83843    2.93905   -2.82622  
H    -14.12396    2.68653   -2.20388  
H    -15.23752    2.11836   -3.18402  
C    -14.83843    5.82900   -2.82622  
H    -14.12396    6.08152   -2.20388  
H    -15.23752    6.64969   -3.18402  
C    -14.27581    3.76325   -3.94149  
H    -14.74304    3.48442   -4.75605  
H    -13.34135    3.48442   -4.04806  
C    -14.27581    5.00480   -3.94149  
H    -14.74304    5.28363   -4.75605
```

|   |           |          |          |
|---|-----------|----------|----------|
| H | -13.34135 | 5.28363  | -4.04806 |
| C | -17.15122 | 1.91775  | -0.99061 |
| C | -17.15122 | 6.85030  | -0.99061 |
| C | -18.10125 | 1.36080  | -1.83942 |
| C | -18.10125 | 7.40725  | -1.83942 |
| C | -18.35239 | -0.01403 | -1.70239 |
| H | -18.99678 | -0.42437 | -2.24861 |
| C | -18.35239 | 8.78208  | -1.70239 |
| H | -18.99677 | 9.19242  | -2.24861 |
| C | -17.66517 | -0.76808 | -0.77840 |
| H | -17.84038 | -1.68873 | -0.70513 |
| C | -17.66517 | 9.53613  | -0.77840 |
| H | -17.84038 | 10.45678 | -0.70513 |
| C | -16.73850 | -0.19114 | 0.02664  |
| H | -16.27906 | -0.72599 | 0.64803  |
| C | -16.73850 | 8.95919  | 0.02664  |
| H | -16.27906 | 9.49405  | 0.64803  |
| C | -16.44453 | 1.17141  | -0.04092 |
| C | -16.44453 | 7.59664  | -0.04092 |
| C | -18.84882 | 2.14642  | -2.91187 |
| H | -18.72812 | 3.10915  | -2.71298 |
| C | -18.84882 | 6.62163  | -2.91187 |
| H | -18.72812 | 5.65890  | -2.71298 |
| C | -18.25310 | 1.88688  | -4.29453 |
| H | -18.28036 | 0.93643  | -4.48389 |
| H | -18.76900 | 2.36562  | -4.96254 |
| H | -17.33422 | 2.19552  | -4.31356 |
| C | -18.25310 | 6.88117  | -4.29453 |
| H | -18.28036 | 7.83162  | -4.48389 |
| H | -18.76900 | 6.40243  | -4.96254 |
| H | -17.33422 | 6.57253  | -4.31356 |
| C | -20.35174 | 1.86584  | -2.93185 |
| H | -20.71384 | 1.98859  | -2.04021 |
| H | -20.78782 | 2.47785  | -3.54467 |
| H | -20.50554 | 0.95396  | -3.22208 |
| C | -20.35174 | 6.90221  | -2.93185 |
| H | -20.71384 | 6.77946  | -2.04021 |
| H | -20.78782 | 6.29020  | -3.54467 |
| H | -20.50554 | 7.81409  | -3.22208 |
| C | -15.40690 | 1.76413  | 0.88593  |
| H | -15.47114 | 2.74966  | 0.82217  |
| C | -15.40690 | 7.00392  | 0.88593  |
| H | -15.47114 | 6.01839  | 0.82217  |
| C | -15.66582 | 1.37132  | 2.35043  |
| H | -15.49645 | 0.42262  | 2.46557  |
| H | -15.07594 | 1.87812  | 2.92995  |
| H | -16.58860 | 1.56422  | 2.57786  |
| C | -15.66582 | 7.39673  | 2.35043  |
| H | -15.49645 | 8.34543  | 2.46557  |
| H | -15.07594 | 6.88993  | 2.92995  |
| H | -16.58860 | 7.20383  | 2.57786  |
| C | -13.97600 | 1.36080  | 0.49863  |
| H | -13.76186 | 1.72380  | -0.37588 |
| H | -13.35109 | 1.70977  | 1.15428  |
| H | -13.90787 | 0.39281  | 0.47199  |
| C | -13.97600 | 7.40725  | 0.49863  |
| H | -13.76186 | 7.04425  | -0.37588 |
| H | -13.35109 | 7.05828  | 1.15428  |
| H | -13.90787 | 8.37524  | 0.47199  |



## Atoms and radius in the parameter file

Atoms and radius in the parameter file

|    |      |
|----|------|
| C2 | 1.99 |
| C3 | 1.99 |
| C  | 1.99 |
| N2 | 1.81 |
| N3 | 1.81 |
| N  | 1.81 |
| O  | 1.78 |
| P  | 2.11 |
| H  | 1.40 |
| F  | 1.72 |

## Coordinates scaled to put the metal at the origin

Coordinates scaled to put the metal at the origin

|   |          |          |          |
|---|----------|----------|----------|
| C | 1.45443  | -0.00001 | -1.51480 |
| N | 2.01725  | -1.07235 | -2.10098 |
| N | 2.01725  | 1.07232  | -2.10098 |
| C | 2.96709  | -0.66972 | -3.04211 |
| C | 2.96709  | 0.66969  | -3.04211 |
| C | 3.98526  | -1.44499 | -3.75199 |
| H | 4.69973  | -1.69751 | -3.12965 |
| H | 3.58617  | -2.26568 | -4.10979 |
| C | 3.98526  | 1.44496  | -3.75199 |
| H | 4.69973  | 1.69748  | -3.12965 |
| H | 3.58617  | 2.26565  | -4.10979 |
| C | 4.54788  | -0.62079 | -4.86726 |
| H | 4.08065  | -0.89962 | -5.68182 |
| H | 5.48234  | -0.89962 | -4.97383 |
| C | 4.54788  | 0.62076  | -4.86726 |
| H | 4.08065  | 0.89959  | -5.68182 |
| H | 5.48234  | 0.89959  | -4.97383 |
| C | 1.67247  | -2.46629 | -1.91638 |
| C | 1.67247  | 2.46626  | -1.91638 |
| C | 0.72244  | -3.02324 | -2.76519 |
| C | 0.72244  | 3.02321  | -2.76519 |
| C | 0.47130  | -4.39807 | -2.62816 |
| H | -0.17309 | -4.80841 | -3.17438 |
| C | 0.47130  | 4.39804  | -2.62816 |
| H | -0.17308 | 4.80838  | -3.17438 |
| C | 1.15852  | -5.15212 | -1.70417 |
| H | 0.98331  | -6.07277 | -1.63090 |
| C | 1.15852  | 5.15209  | -1.70417 |
| H | 0.98331  | 6.07274  | -1.63090 |
| C | 2.08519  | -4.57518 | -0.89913 |
| H | 2.54463  | -5.11003 | -0.27774 |
| C | 2.08519  | 4.57515  | -0.89913 |
| H | 2.54463  | 5.11001  | -0.27774 |
| C | 2.37916  | -3.21263 | -0.96669 |
| C | 2.37916  | 3.21260  | -0.96669 |
| C | -0.02513 | -2.23762 | -3.83764 |
| H | 0.09557  | -1.27489 | -3.63875 |
| C | -0.02513 | 2.23759  | -3.83764 |

|    |          |          |          |
|----|----------|----------|----------|
| H  | 0.09557  | 1.27486  | -3.63875 |
| C  | 0.57059  | -2.49716 | -5.22030 |
| H  | 0.54333  | -3.44761 | -5.40966 |
| H  | 0.05469  | -2.01842 | -5.88831 |
| H  | 1.48947  | -2.18852 | -5.23933 |
| C  | 0.57059  | 2.49713  | -5.22030 |
| H  | 0.54333  | 3.44758  | -5.40966 |
| H  | 0.05469  | 2.01839  | -5.88831 |
| H  | 1.48947  | 2.18849  | -5.23933 |
| C  | -1.52805 | -2.51820 | -3.85762 |
| H  | -1.89015 | -2.39545 | -2.96598 |
| H  | -1.96413 | -1.90619 | -4.47044 |
| H  | -1.68185 | -3.43008 | -4.14785 |
| C  | -1.52805 | 2.51817  | -3.85762 |
| H  | -1.89015 | 2.39542  | -2.96598 |
| H  | -1.96413 | 1.90616  | -4.47044 |
| H  | -1.68185 | 3.43005  | -4.14785 |
| C  | 3.41679  | -2.61991 | -0.03984 |
| H  | 3.35255  | -1.63438 | -0.10360 |
| C  | 3.41679  | 2.61988  | -0.03984 |
| H  | 3.35255  | 1.63435  | -0.10360 |
| C  | 3.15787  | -3.01272 | 1.42466  |
| H  | 3.32724  | -3.96142 | 1.53980  |
| H  | 3.74775  | -2.50592 | 2.00418  |
| H  | 2.23509  | -2.81982 | 1.65209  |
| C  | 3.15787  | 3.01269  | 1.42466  |
| H  | 3.32724  | 3.96139  | 1.53980  |
| H  | 3.74775  | 2.50589  | 2.00418  |
| H  | 2.23509  | 2.81979  | 1.65209  |
| C  | 4.84769  | -3.02324 | -0.42714 |
| H  | 5.06183  | -2.66024 | -1.30165 |
| H  | 5.47260  | -2.67427 | 0.22851  |
| H  | 4.91582  | -3.99123 | -0.45378 |
| C  | 4.84769  | 3.02321  | -0.42714 |
| H  | 5.06183  | 2.66021  | -1.30165 |
| H  | 5.47260  | 2.67424  | 0.22851  |
| H  | 4.91582  | 3.99120  | -0.45378 |
| XX | 0.00000  | 0.00000  | 0.00000  |

### Results : Volumes in Angs^3

Results : Volumes in Angs^3

N of voxels examined : 1436277  
Volume of voxel : 0.125E-03

| V Free  | V Buried | V Total | V Exact |
|---------|----------|---------|---------|
| 119.827 | 59.707   | 179.535 | 179.594 |

| %V_Free | %V_Bur | % Tot/Ex |
|---------|--------|----------|
| 66.743  | 33.257 | 99.967   |

**The %V\_Bur of your molecule is: 33.3**

## 9. References

- (1) R. A. Kelly III., H. Clavier, S. Giudice, N. M. Scott, E. D. Stevens, J. Bordner, I. Samardjiev, C. D. Hoff, L. Cavallo, S. P. Nolan, *Organometallics* 2008, **27**, 202.
- (2) S. S. Sohn, E. L. Rosen and J. W. Bode, *J. Am. Chem. Soc.* 2004, **126**, 14370.
- (3) A. Poater, B. Cosenza, A. Correa, S. Giudice, F. Ragone, V. Scarano, L. Cavallo, *Eur. J. Inorg. Chem.* 2009, 1759.
- (4) [www.molnac.unisa.it/OMtools/sambvca.php](http://www.molnac.unisa.it/OMtools/sambvca.php) (retrieved 4<sup>th</sup> May 2009).
