# Supplementary figures and images for: Investigation of the properties of 4,5-dialkylated N-heterocyclic carbenes
Source: Royal Society of Chemistry journal article supplement (doi:10.1039/b908981k), 2009-01-01

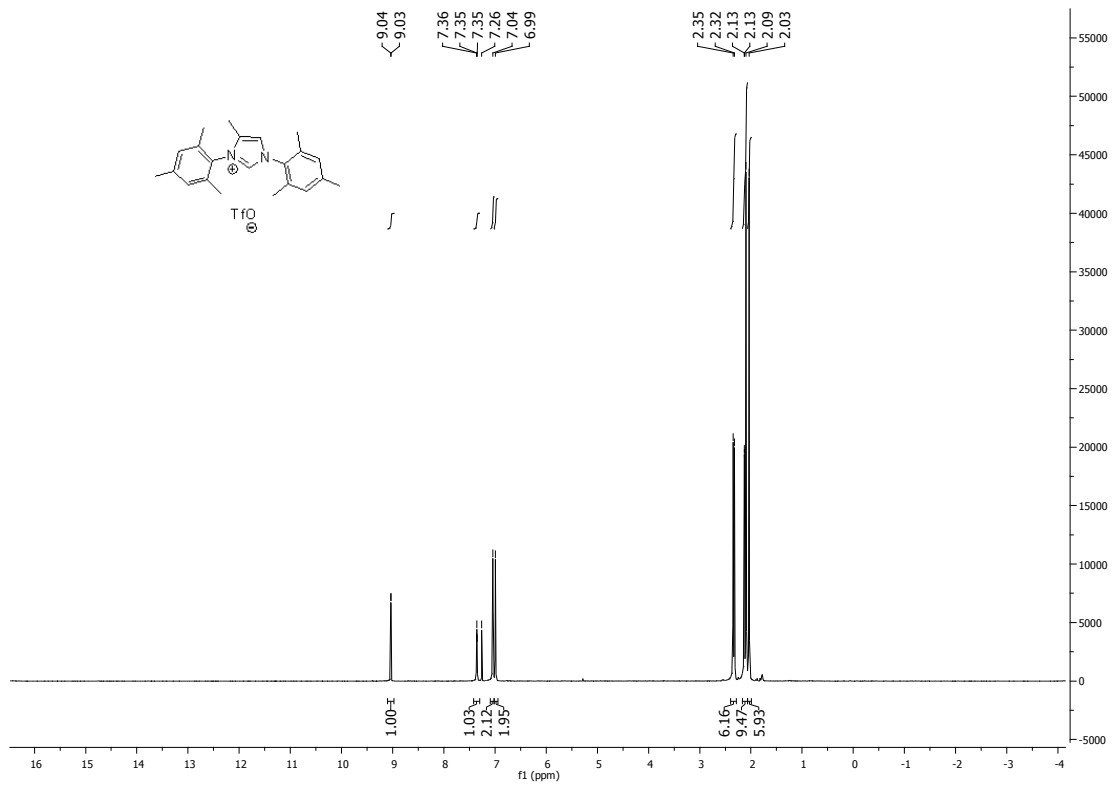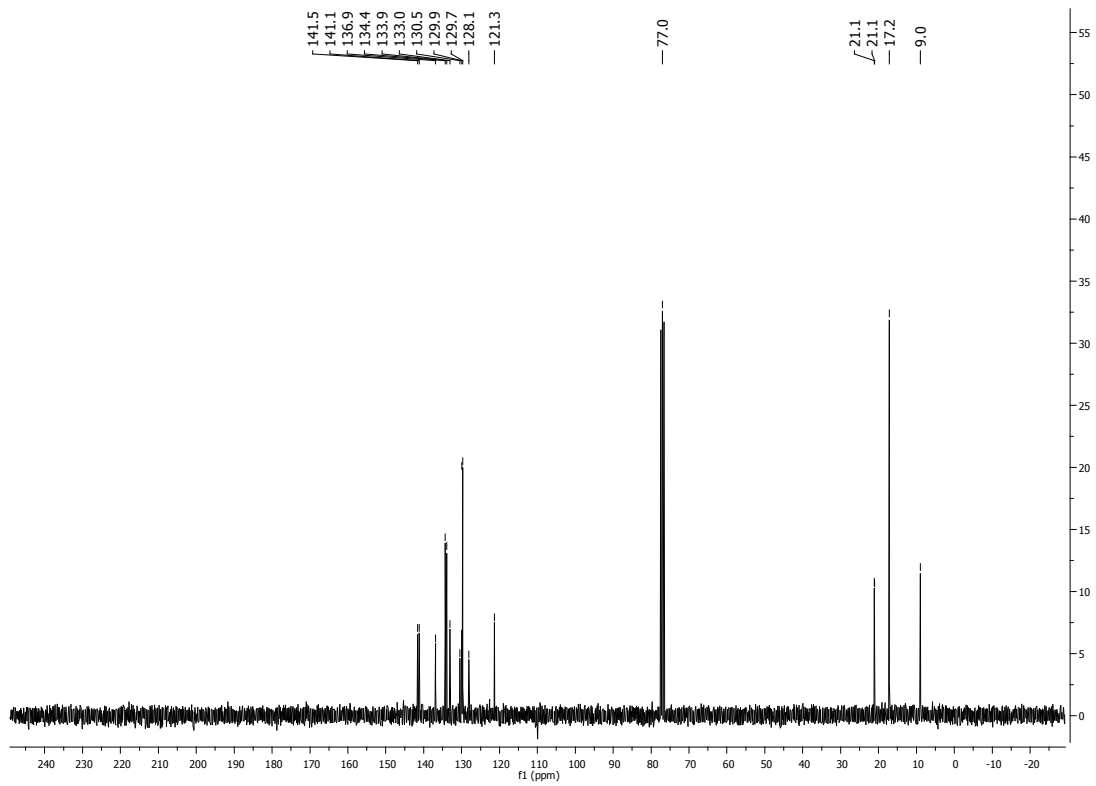

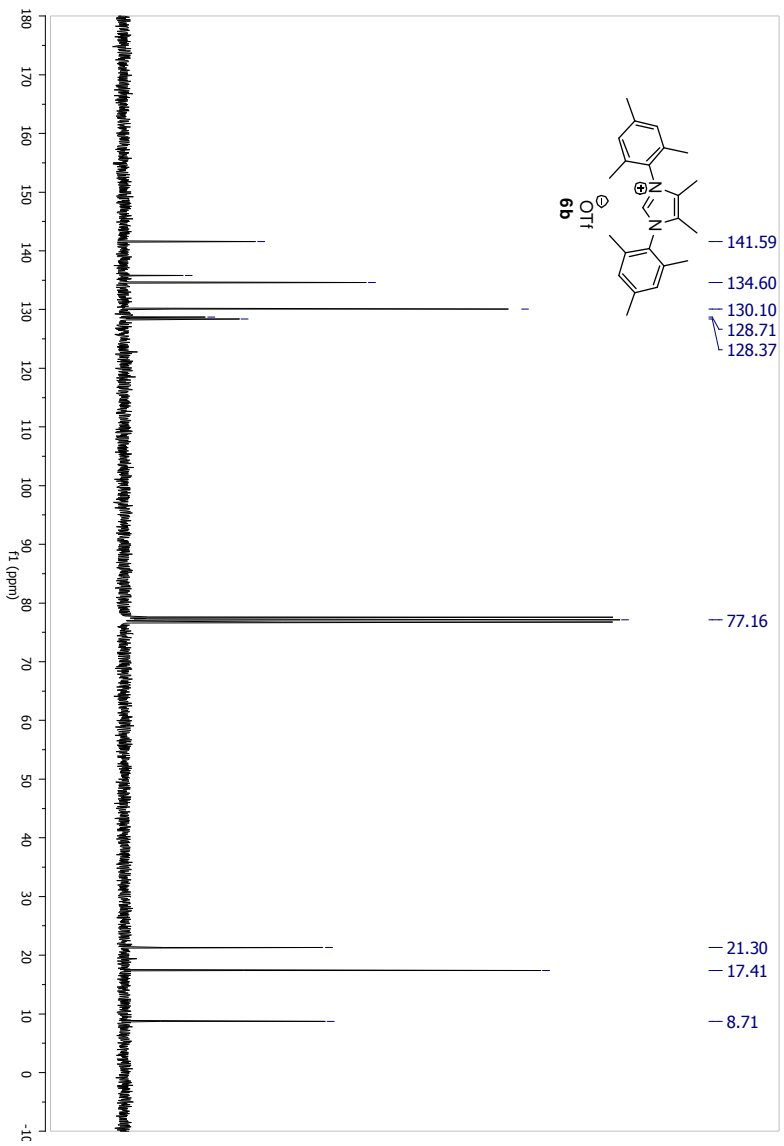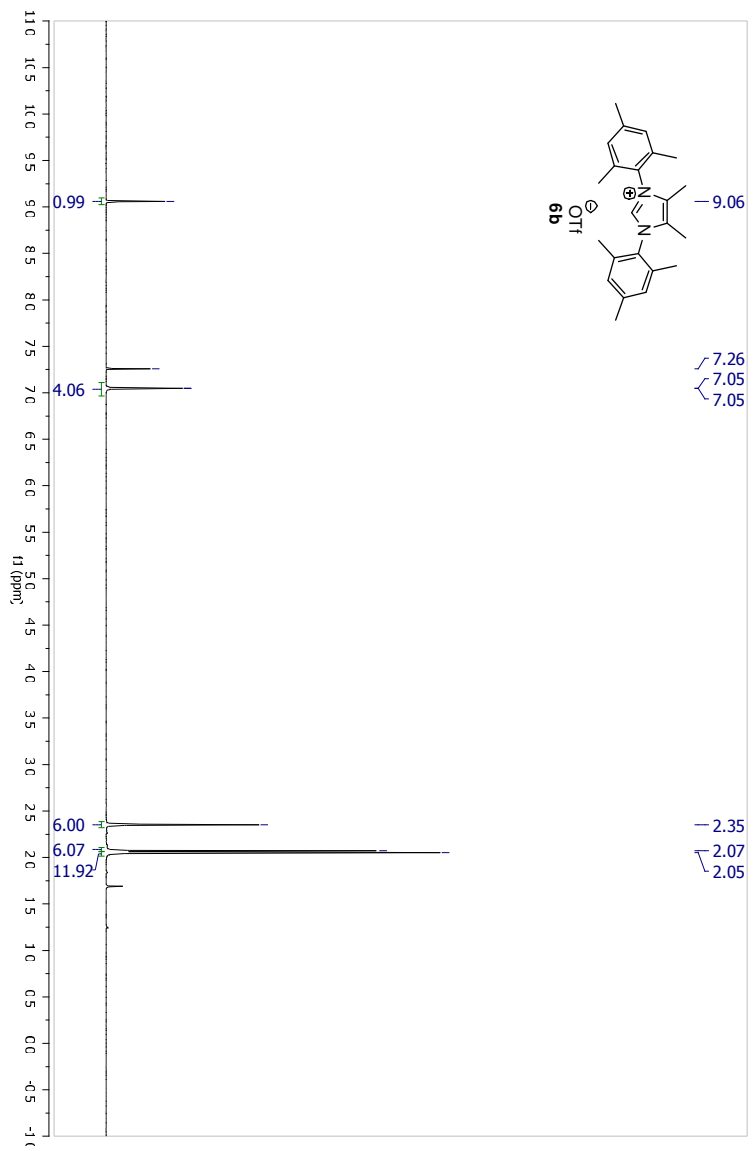

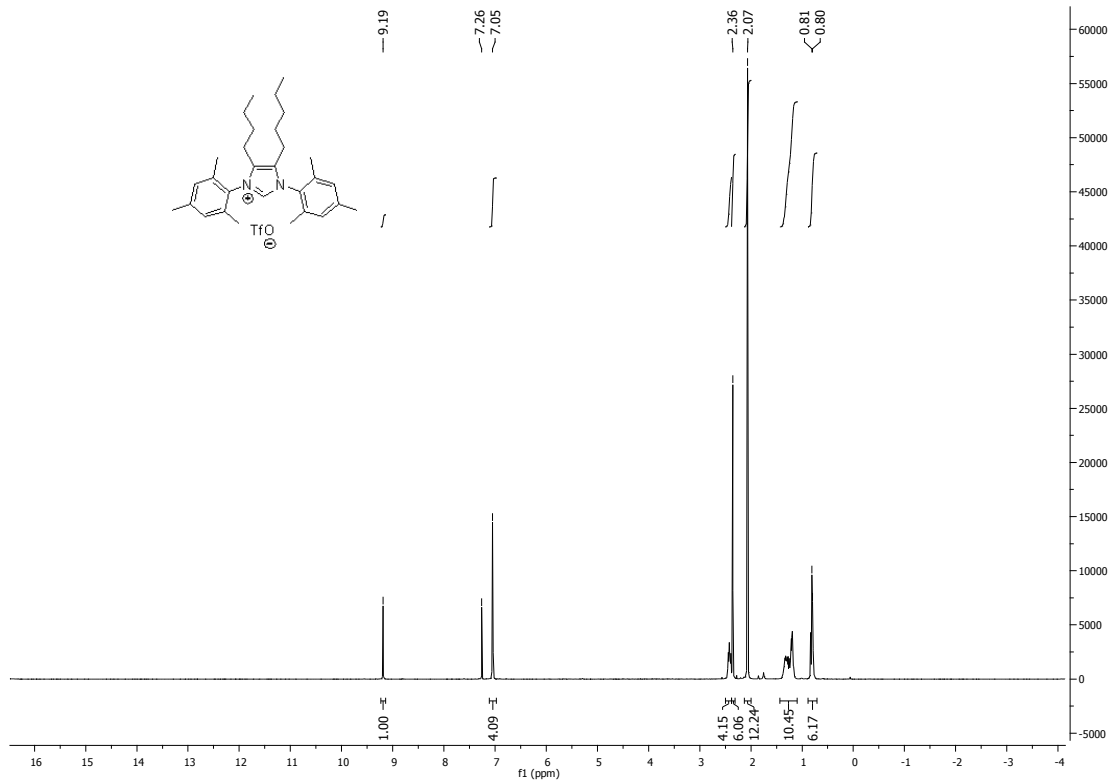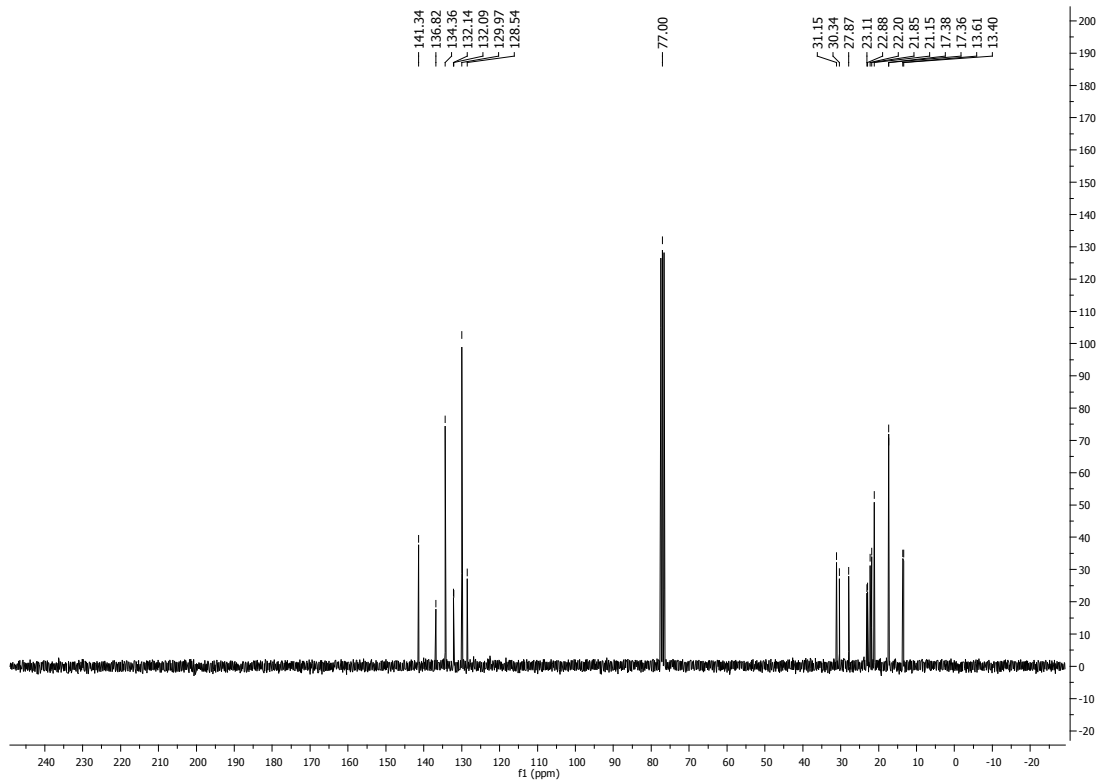

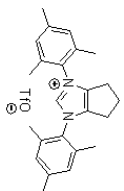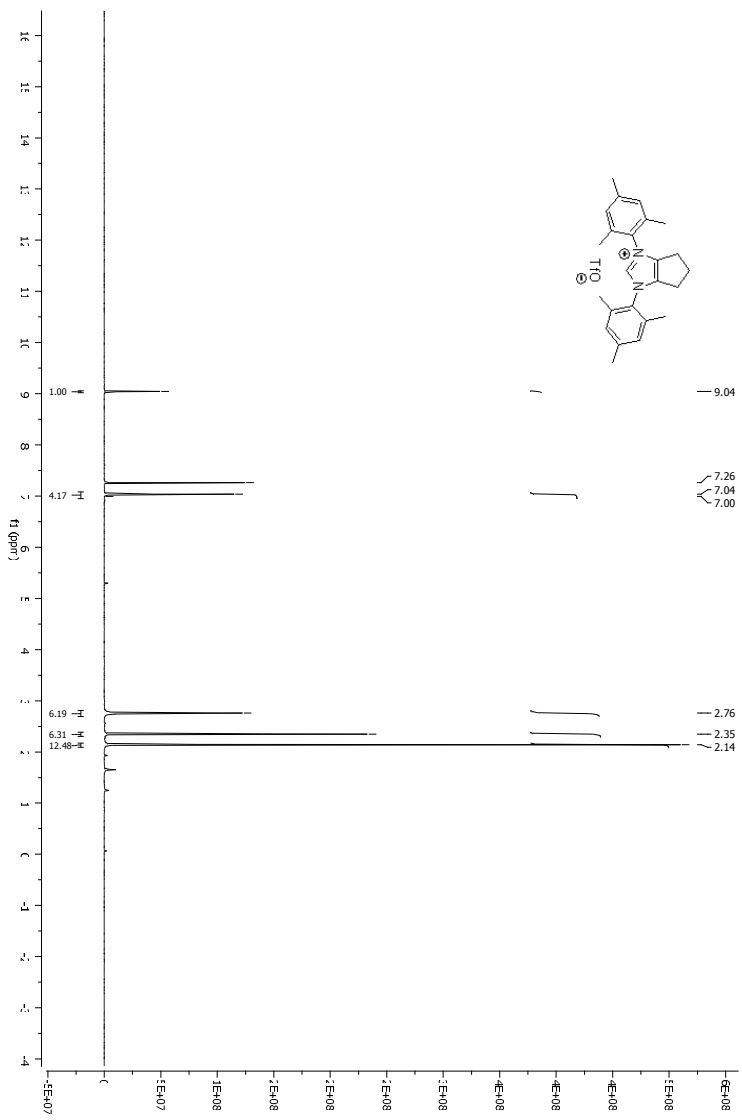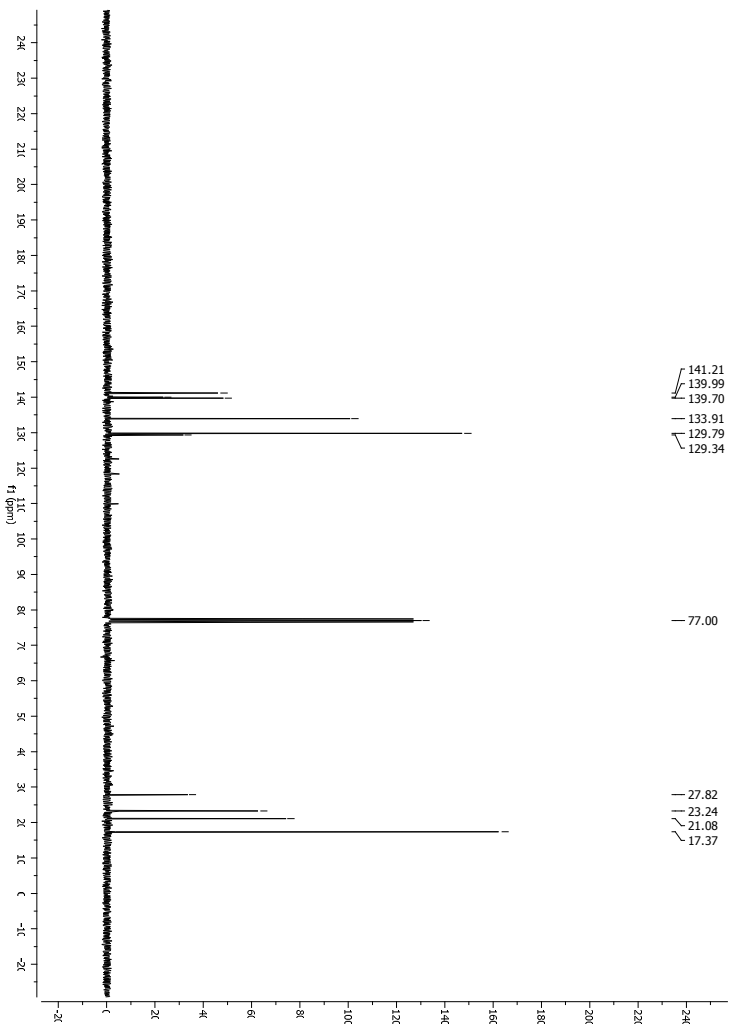

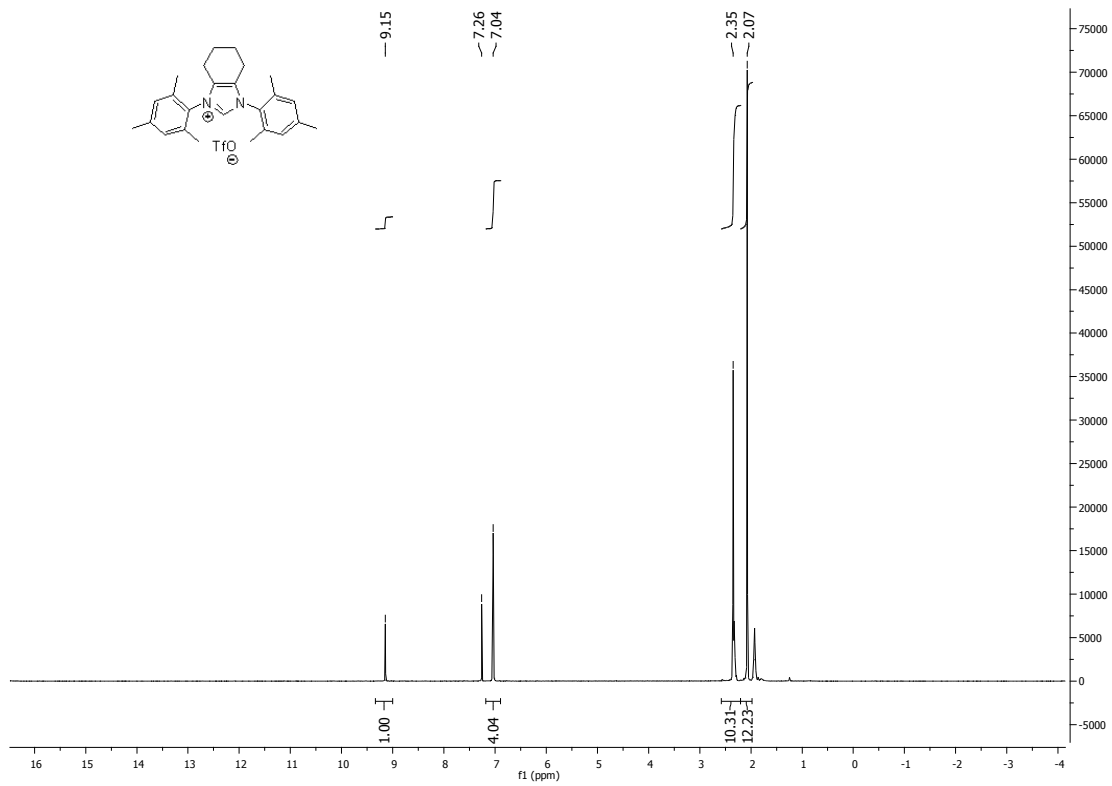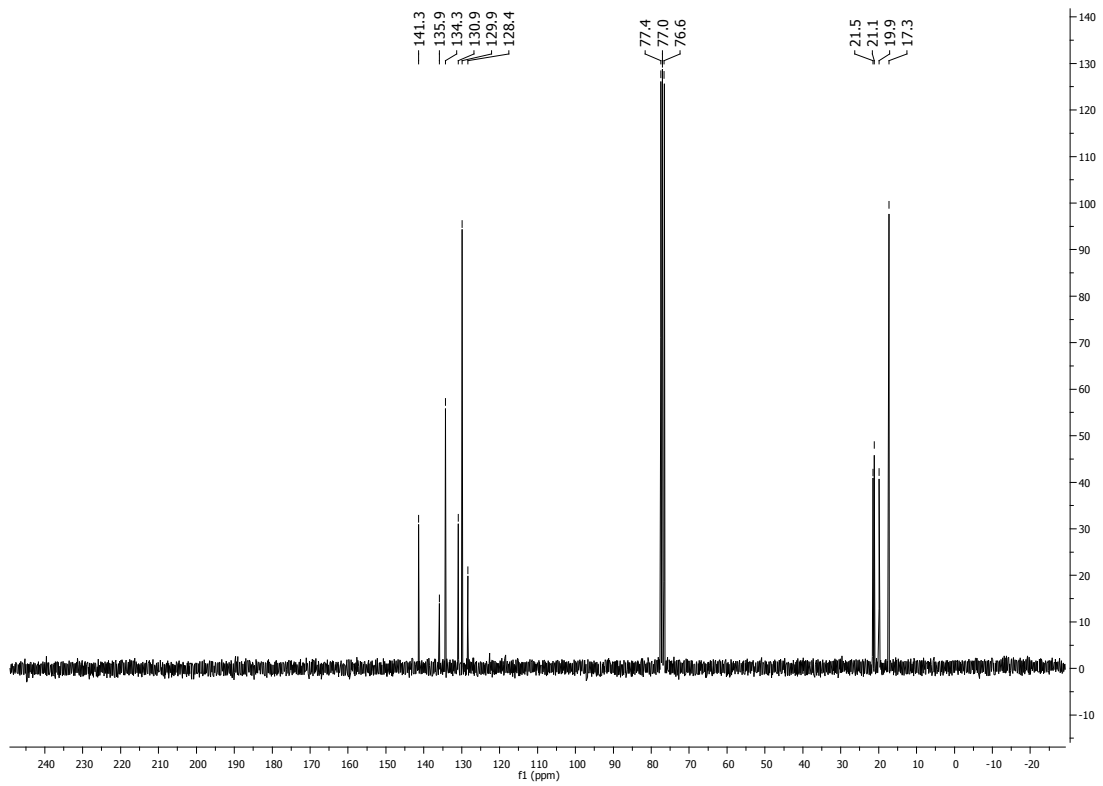

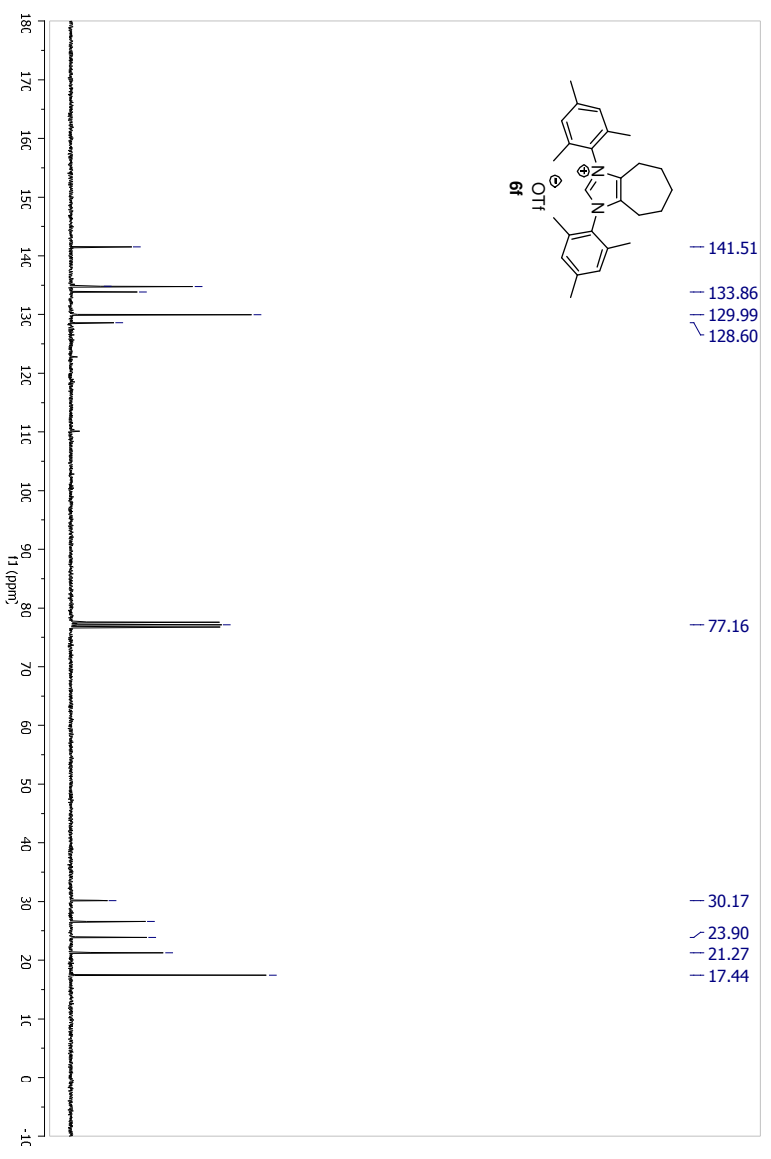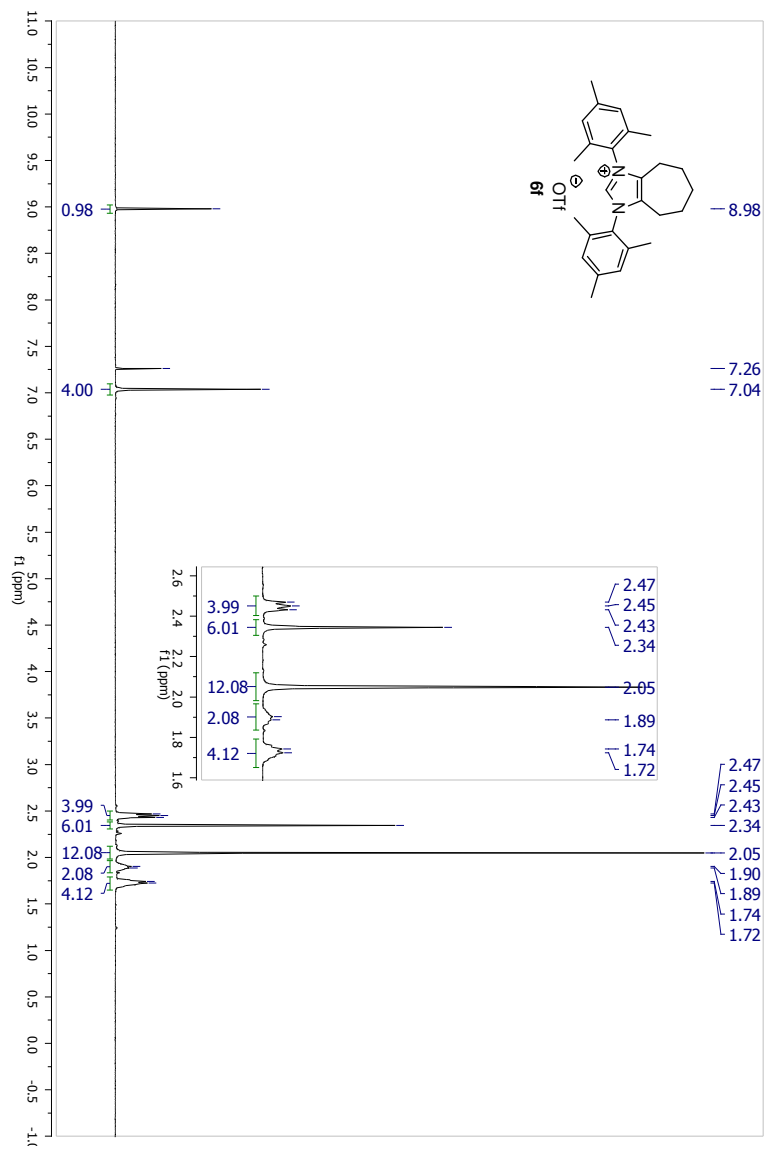

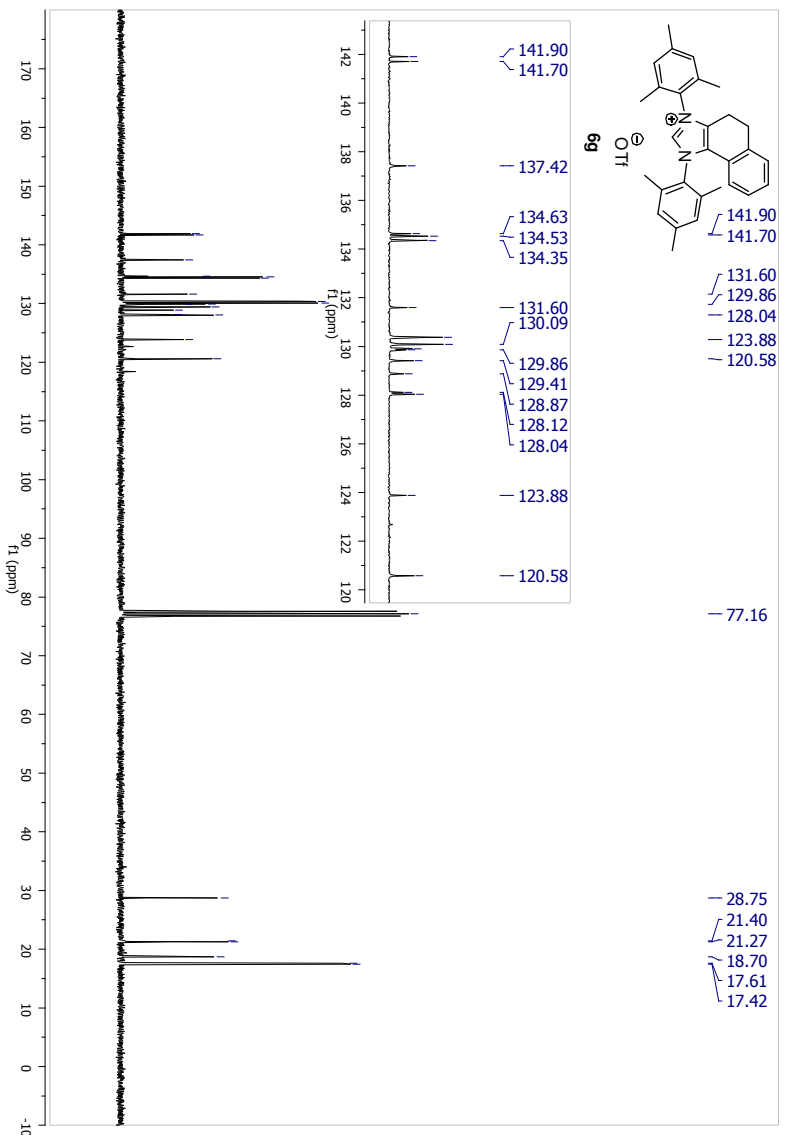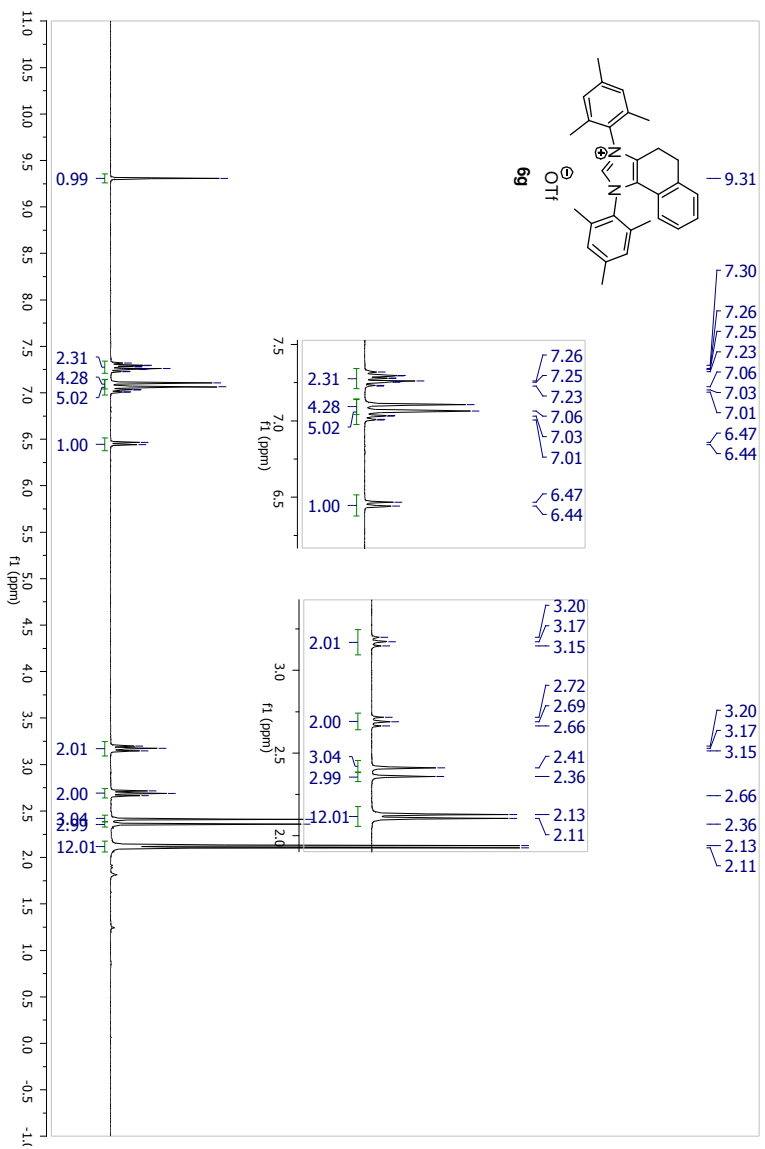

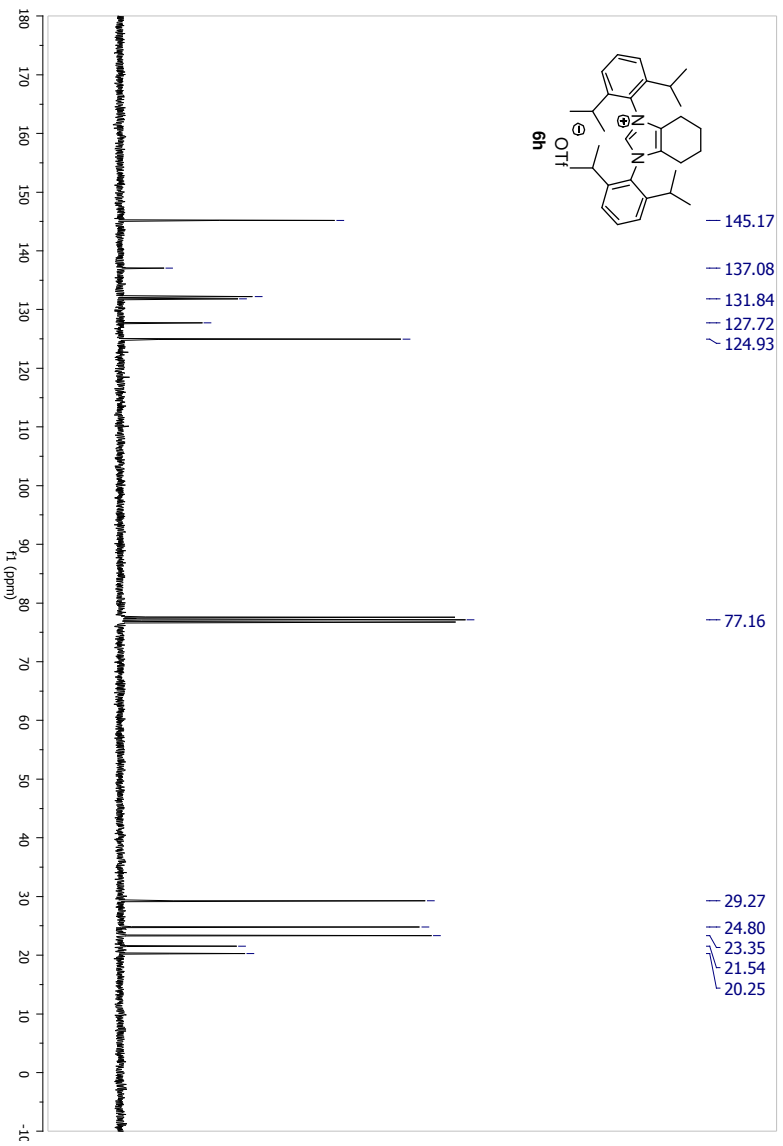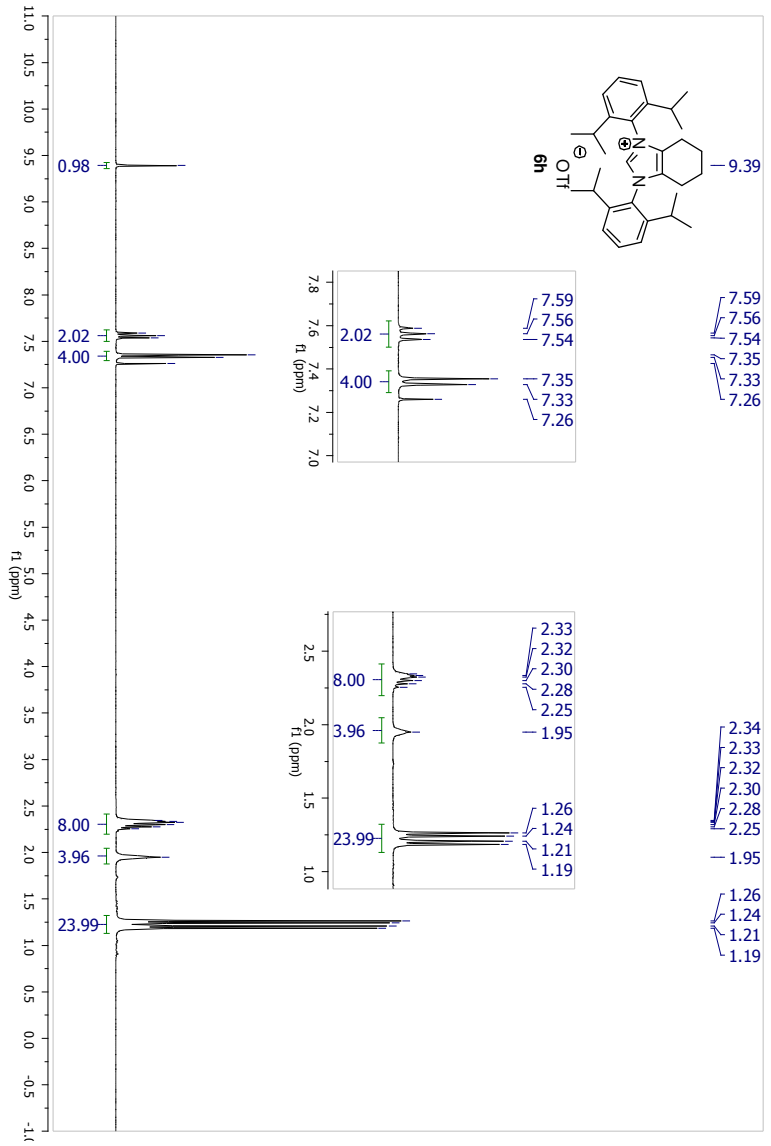



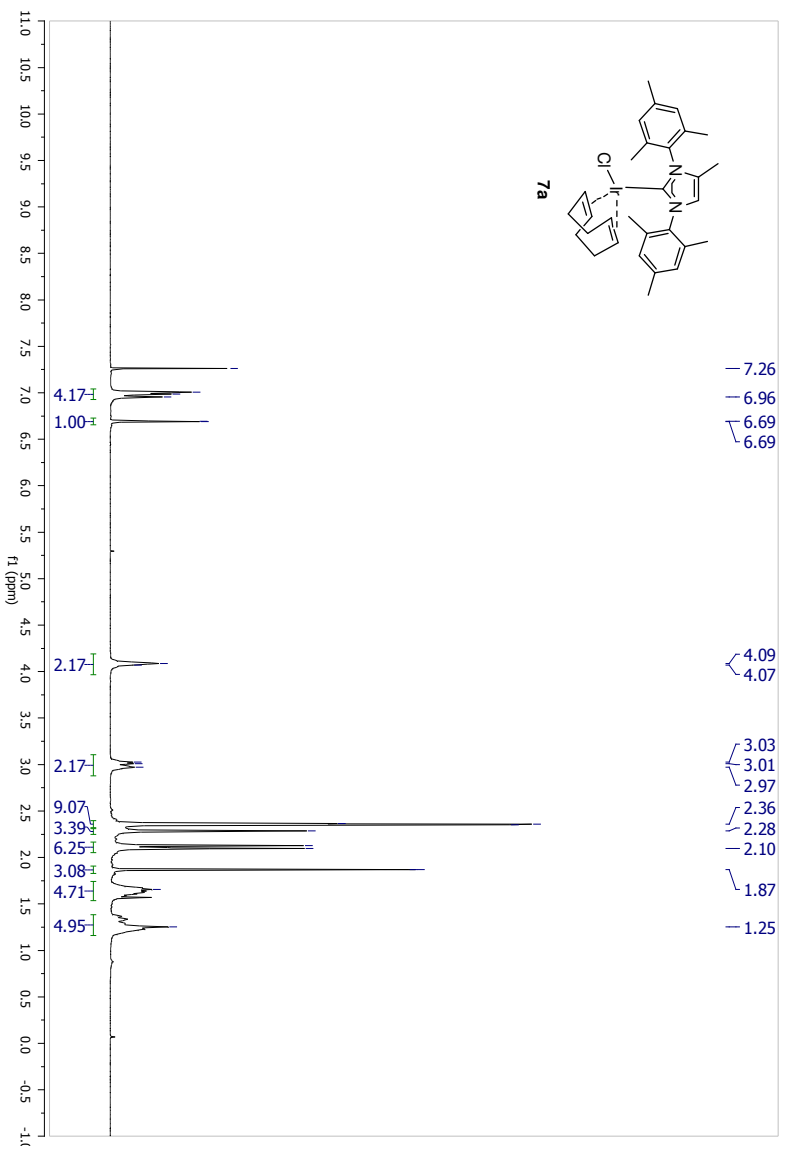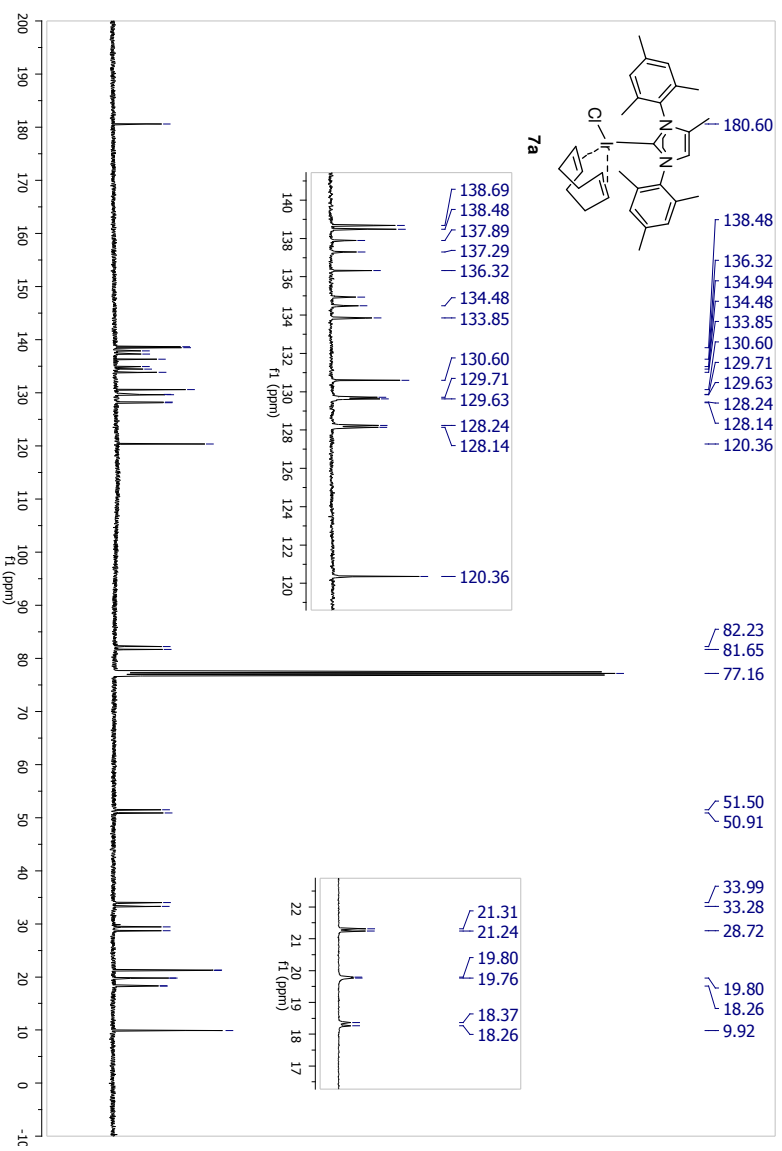

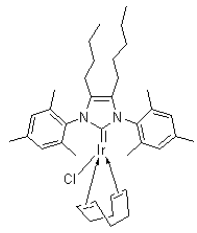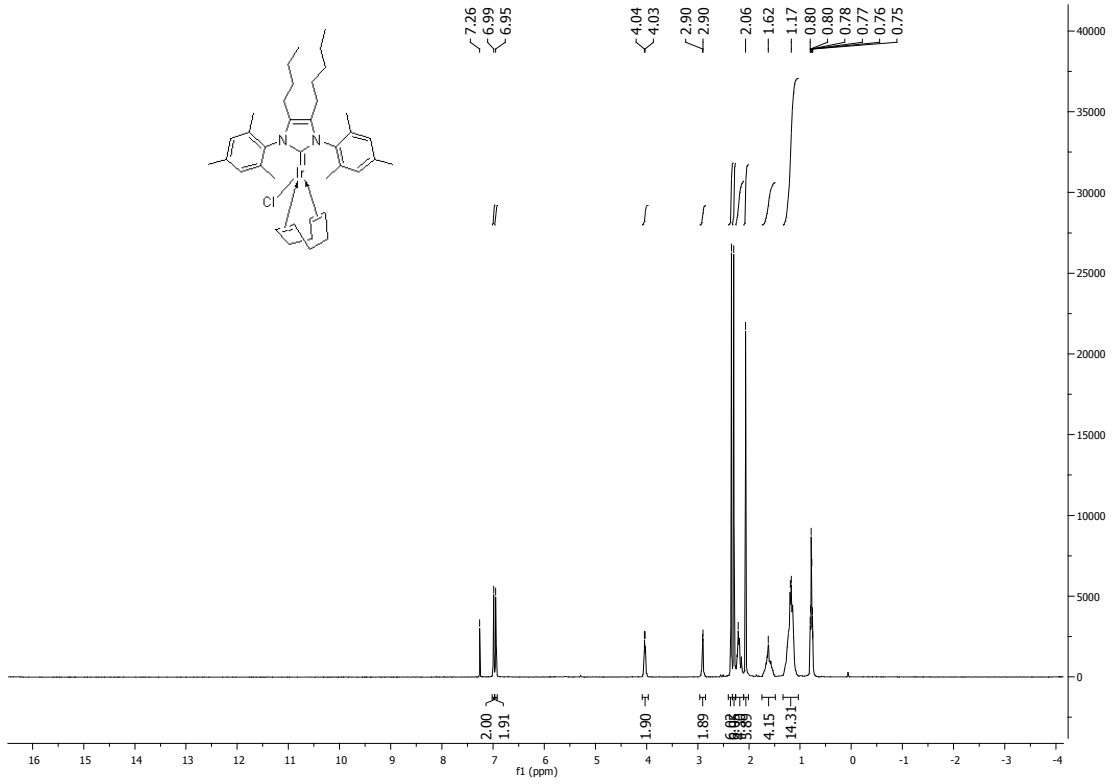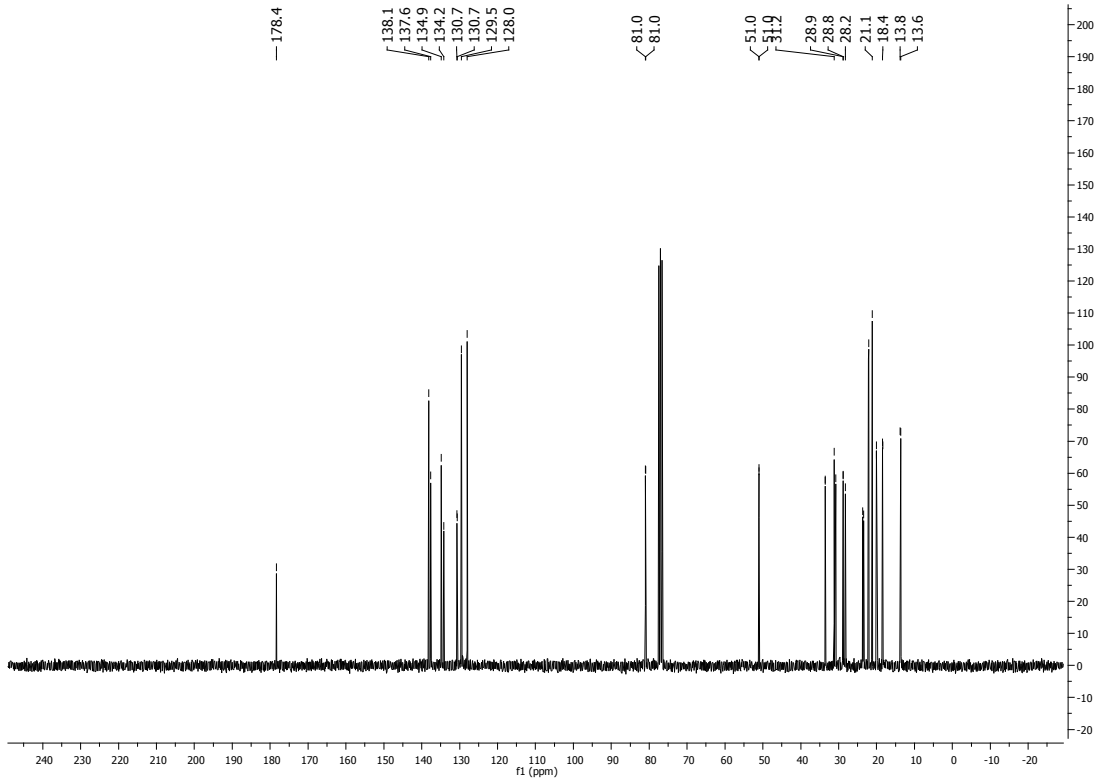

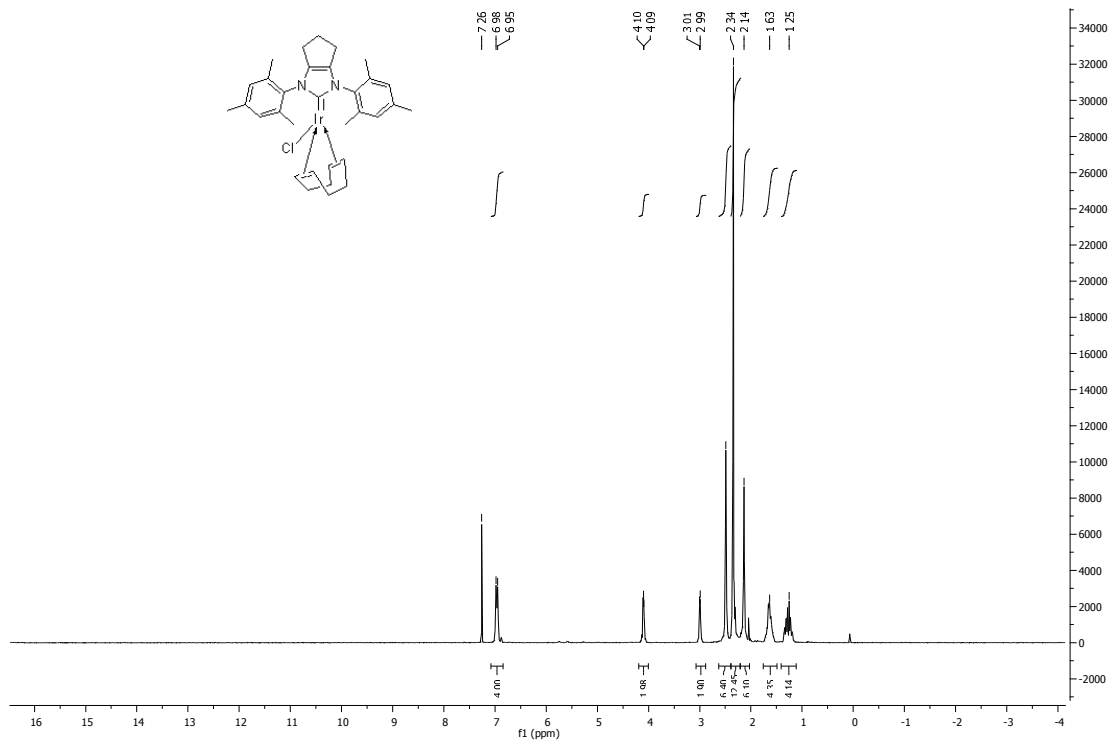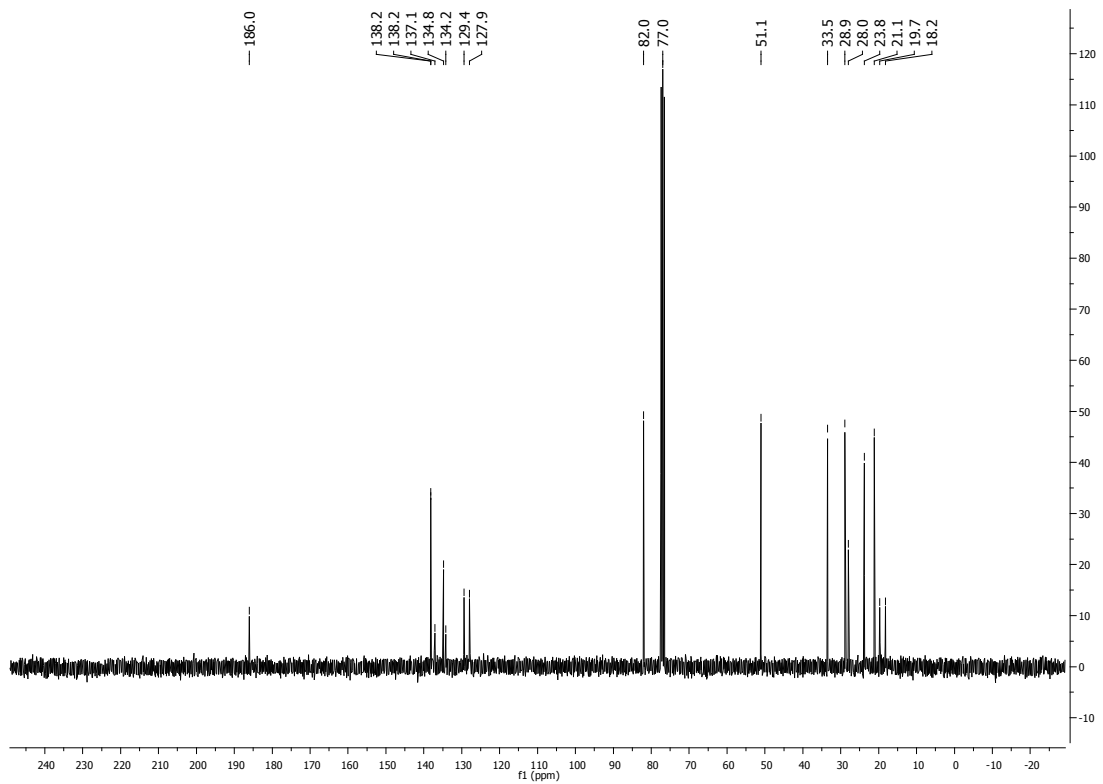

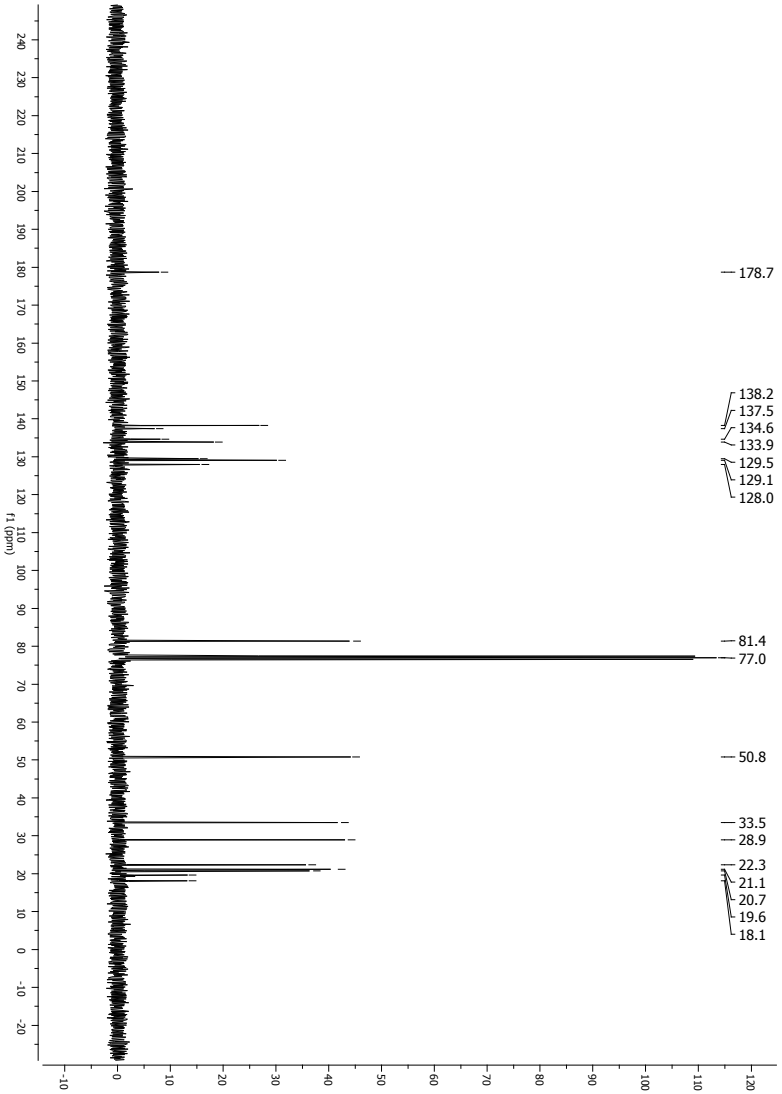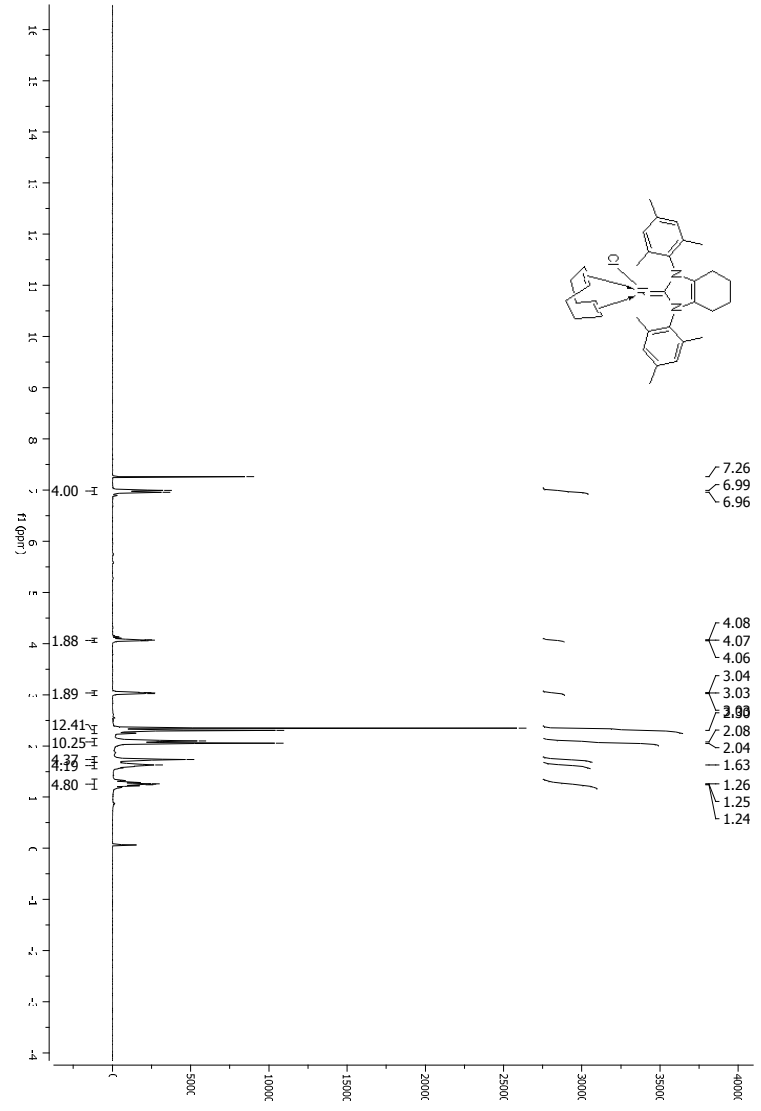

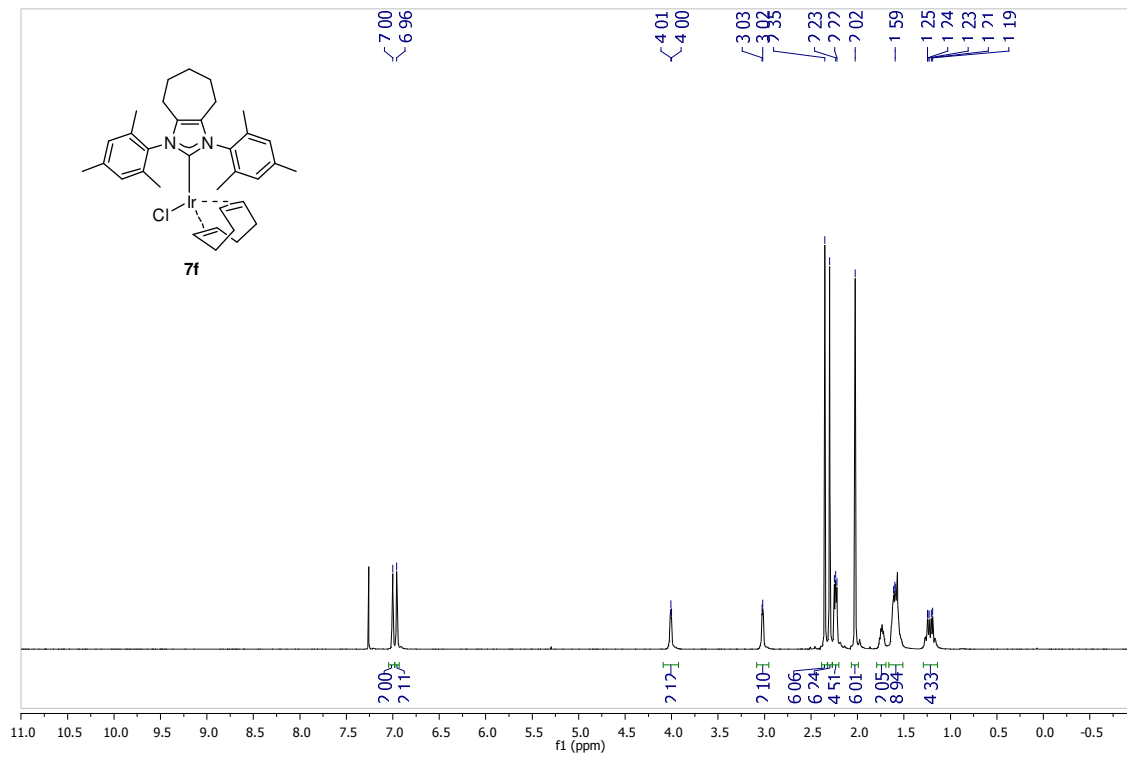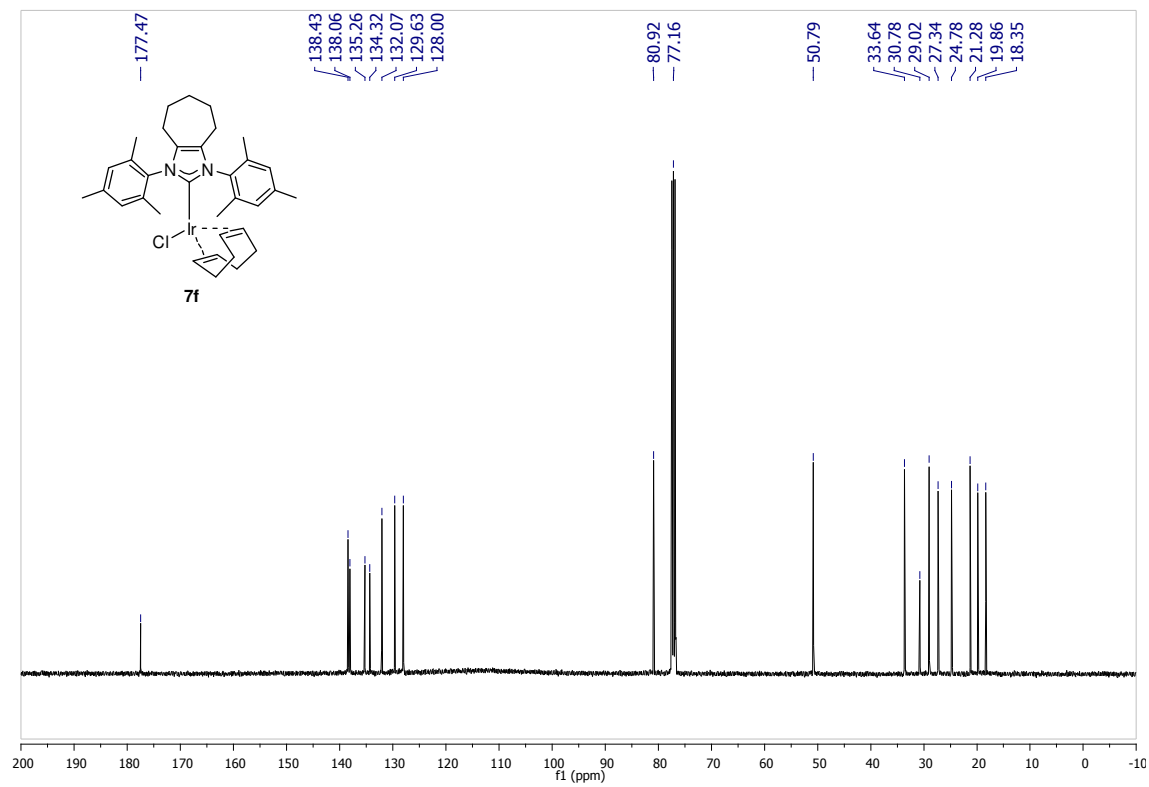

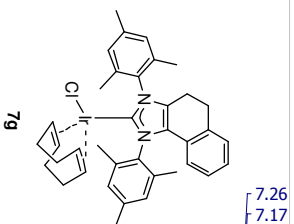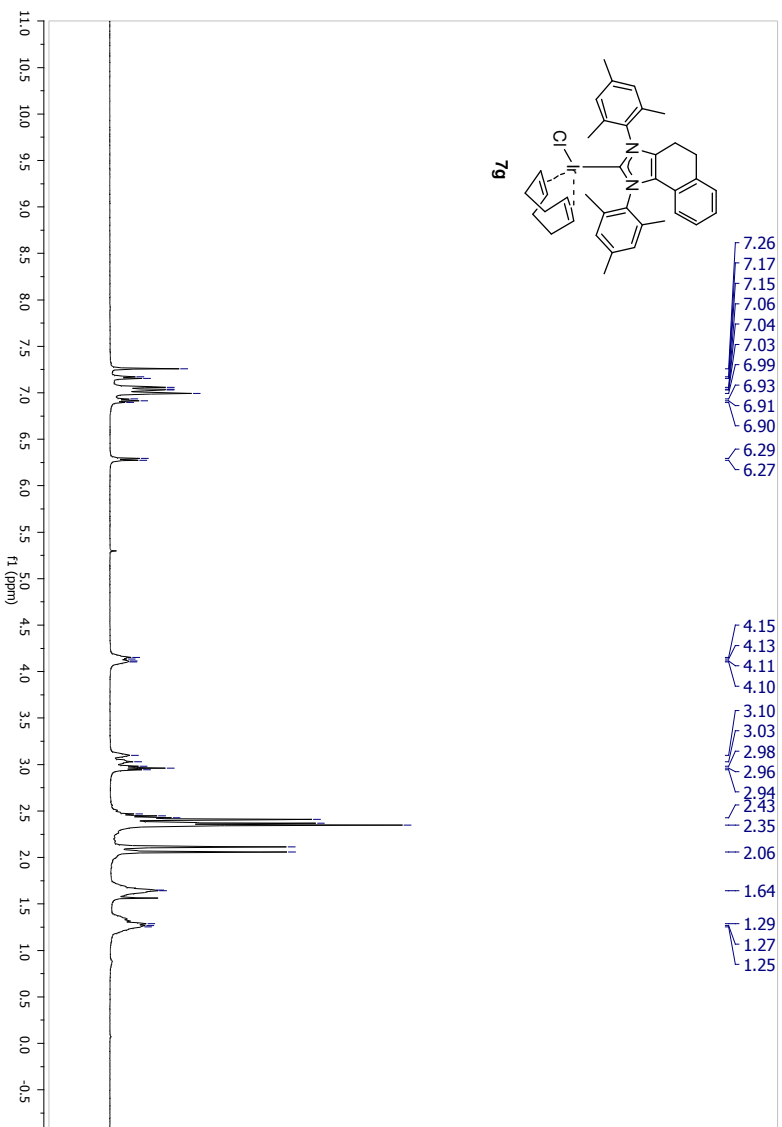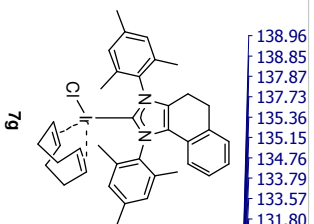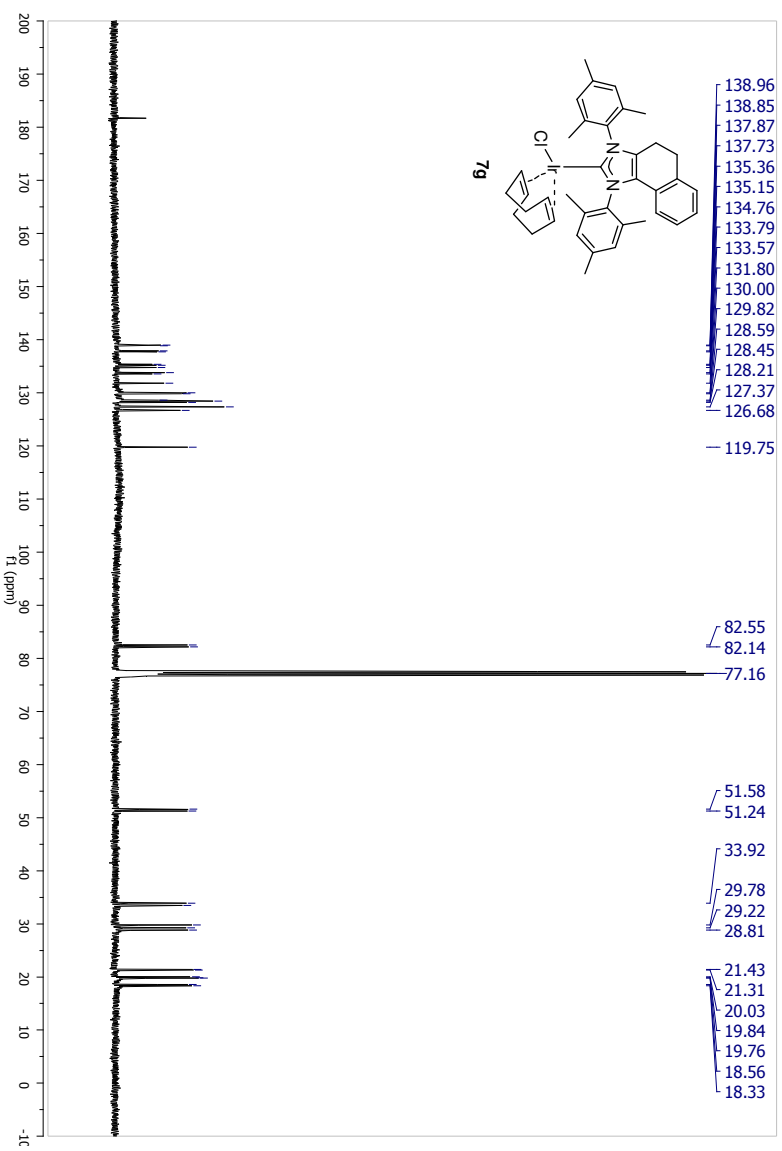

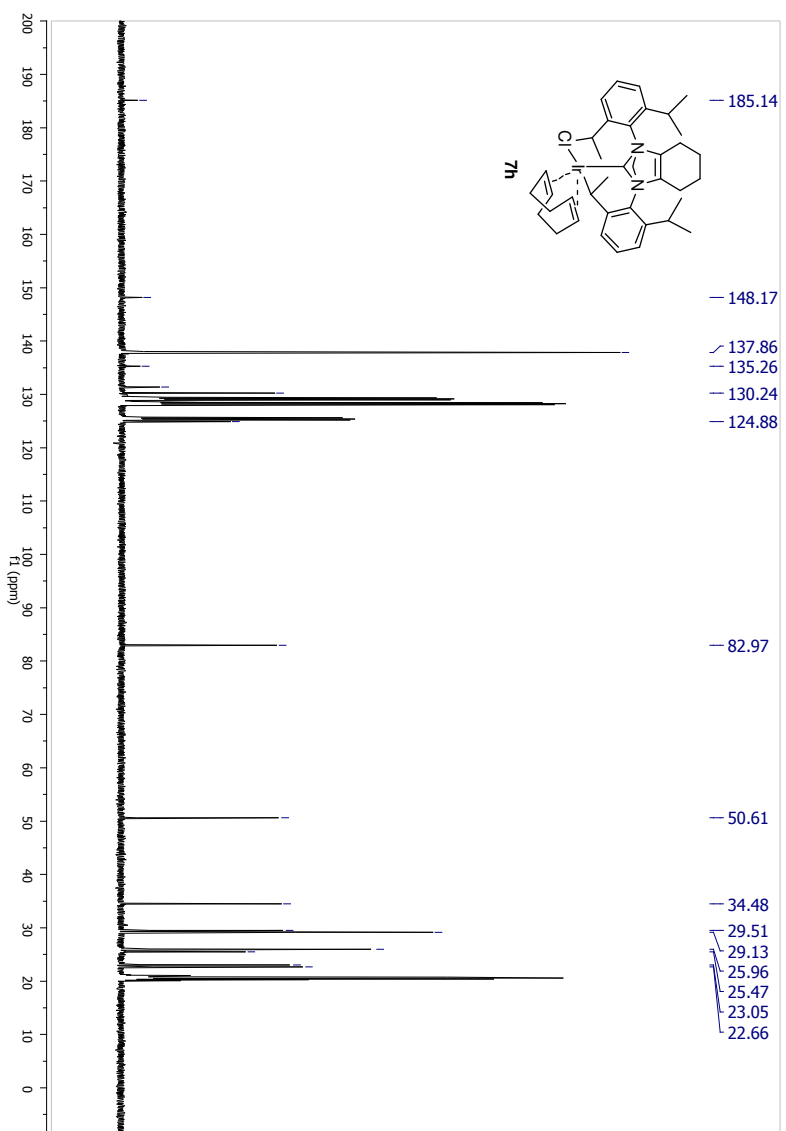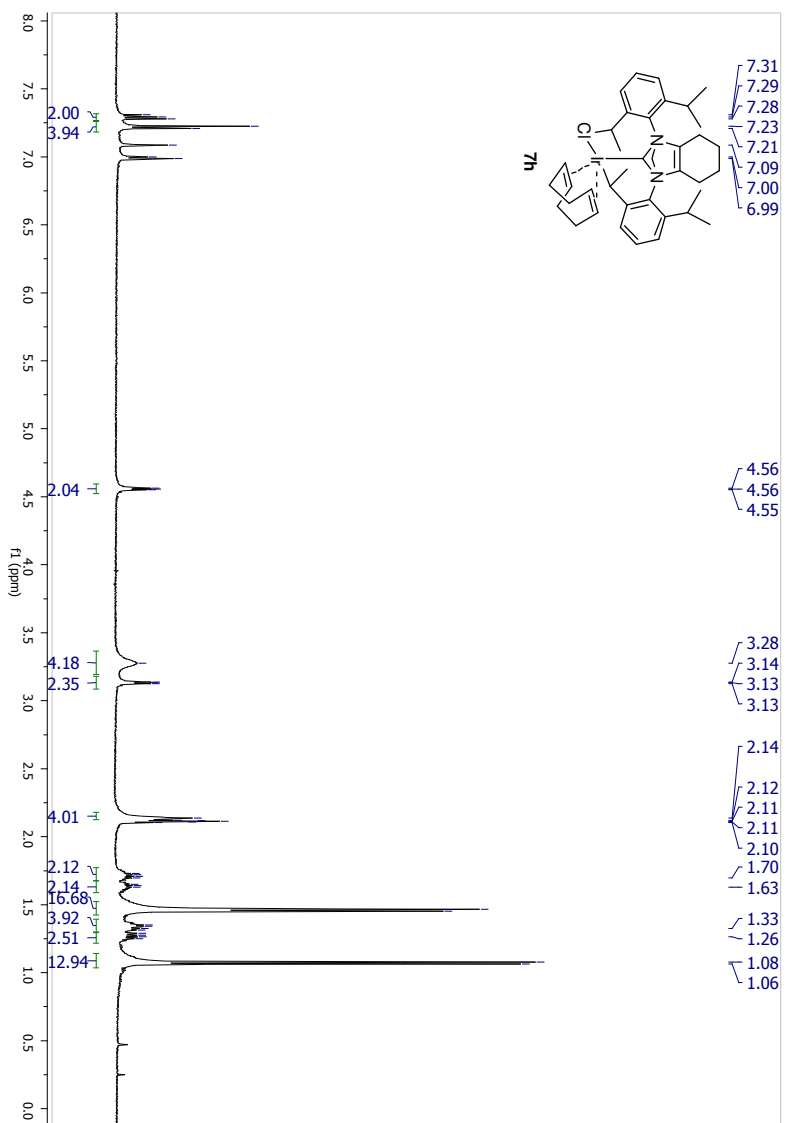

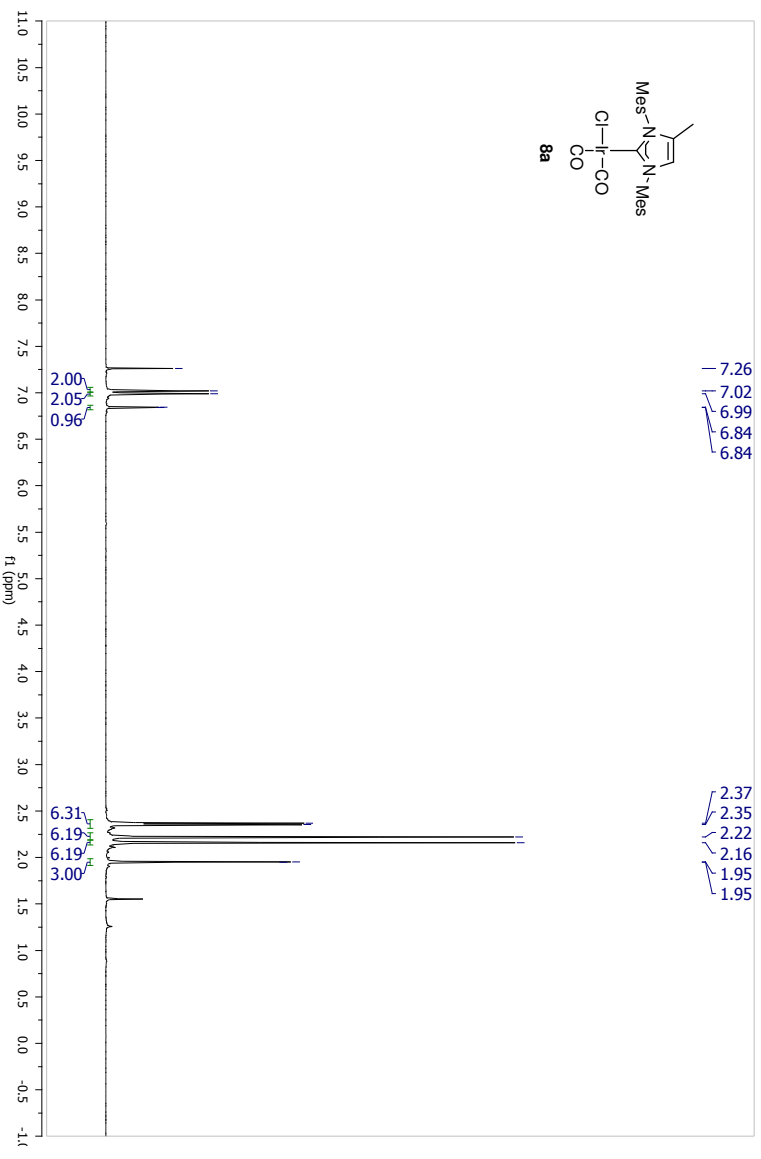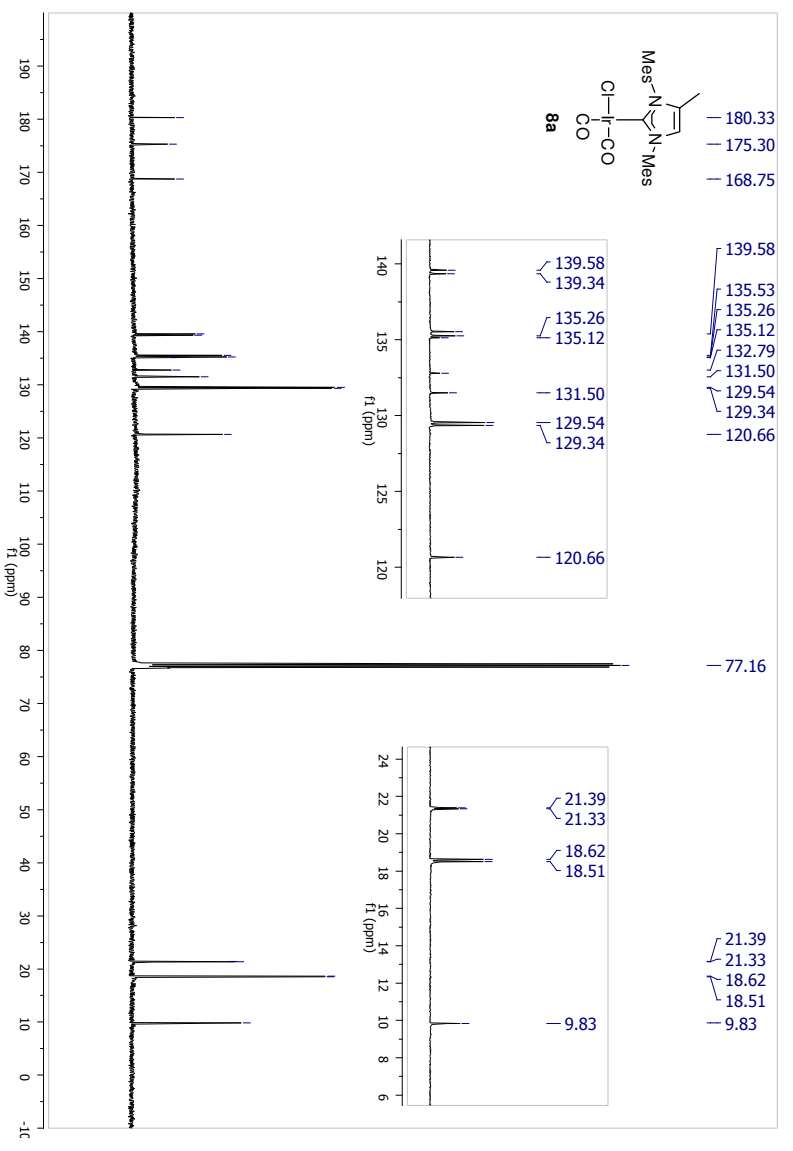



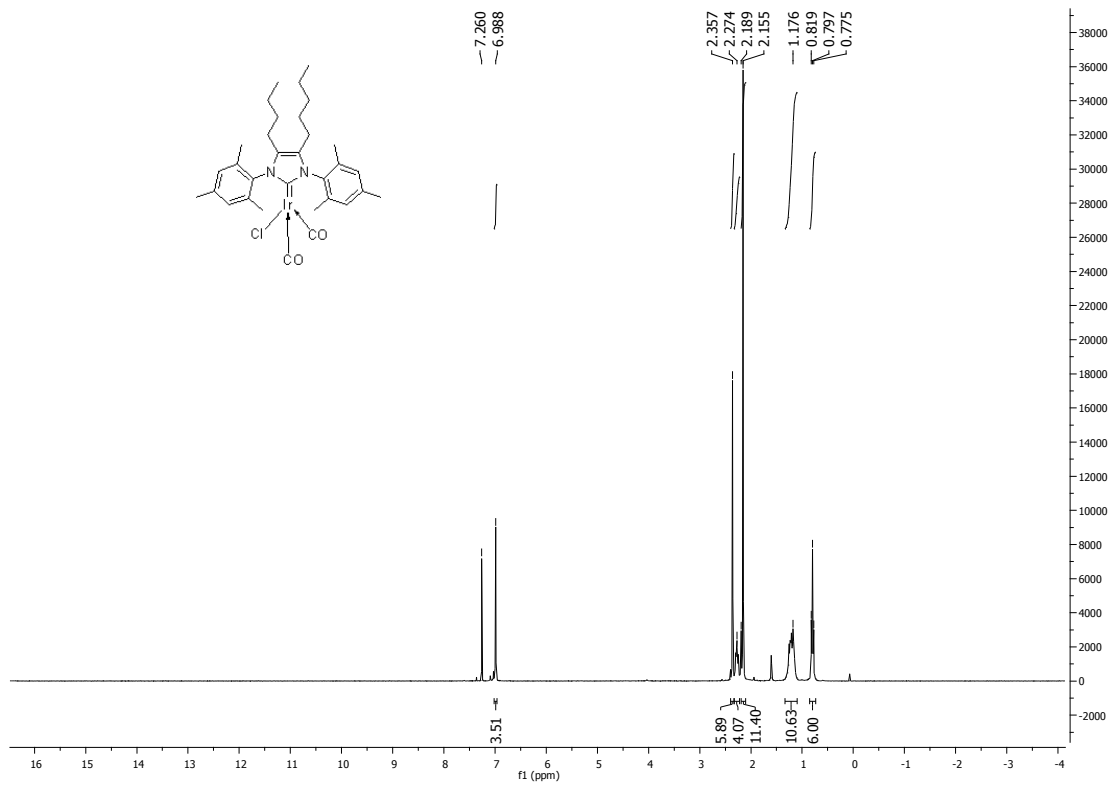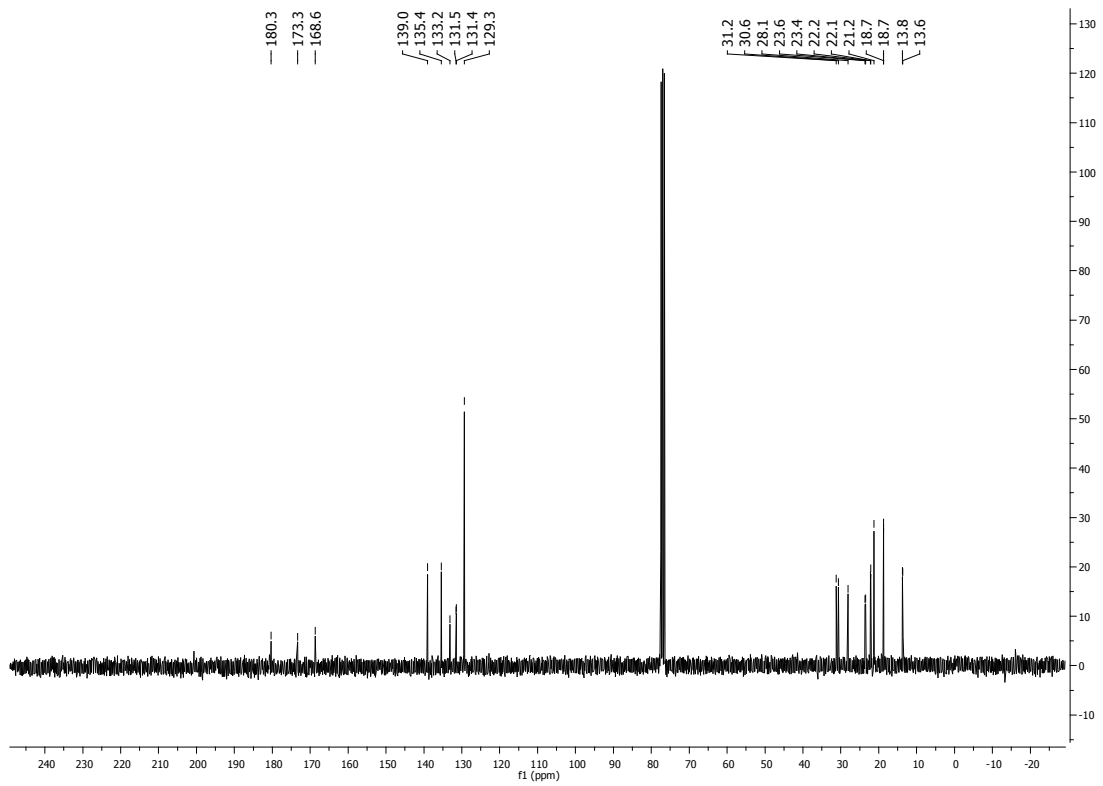

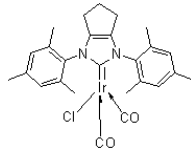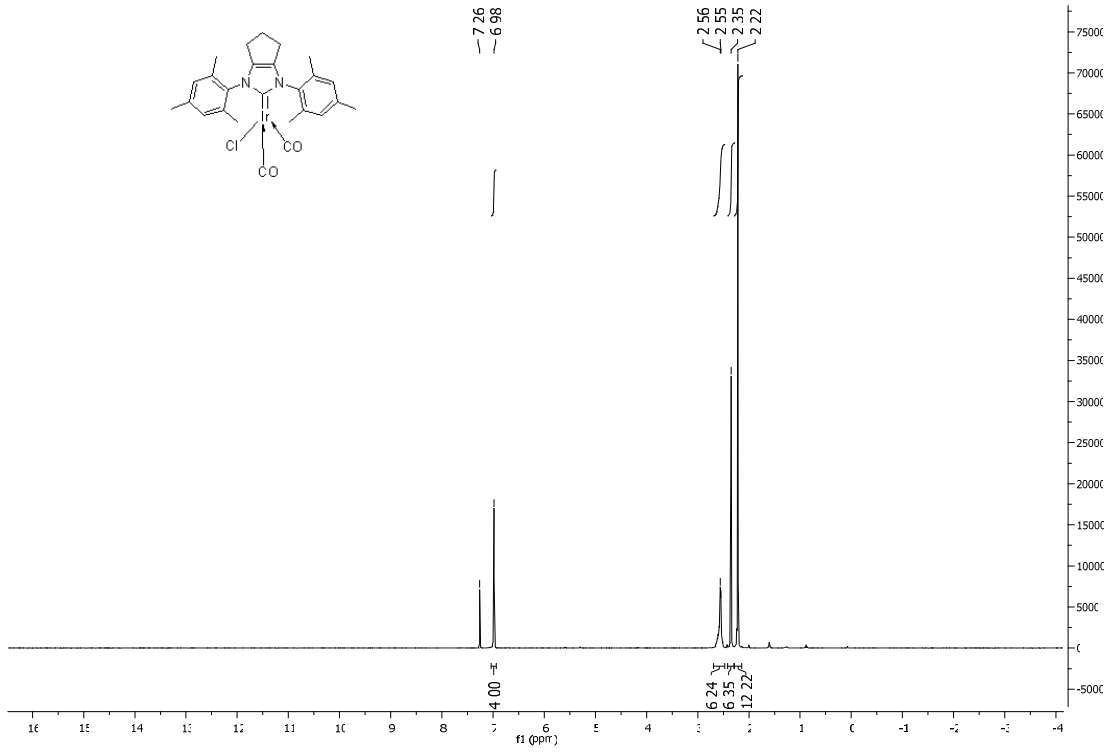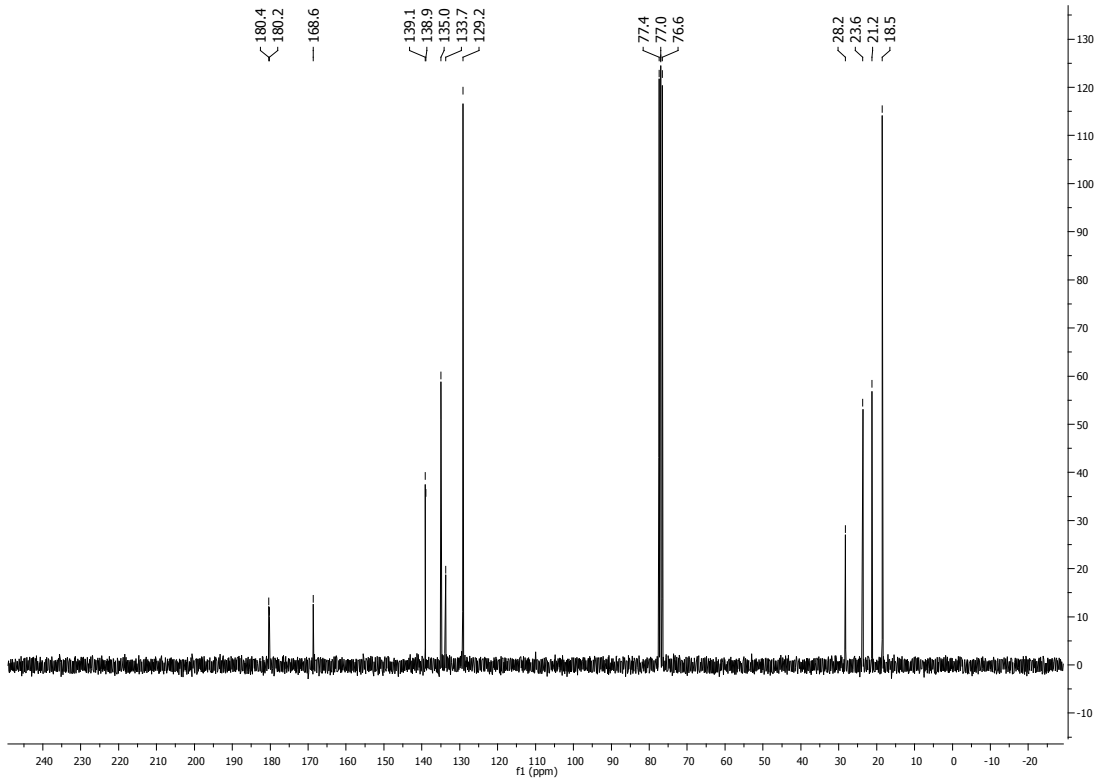

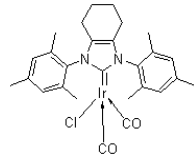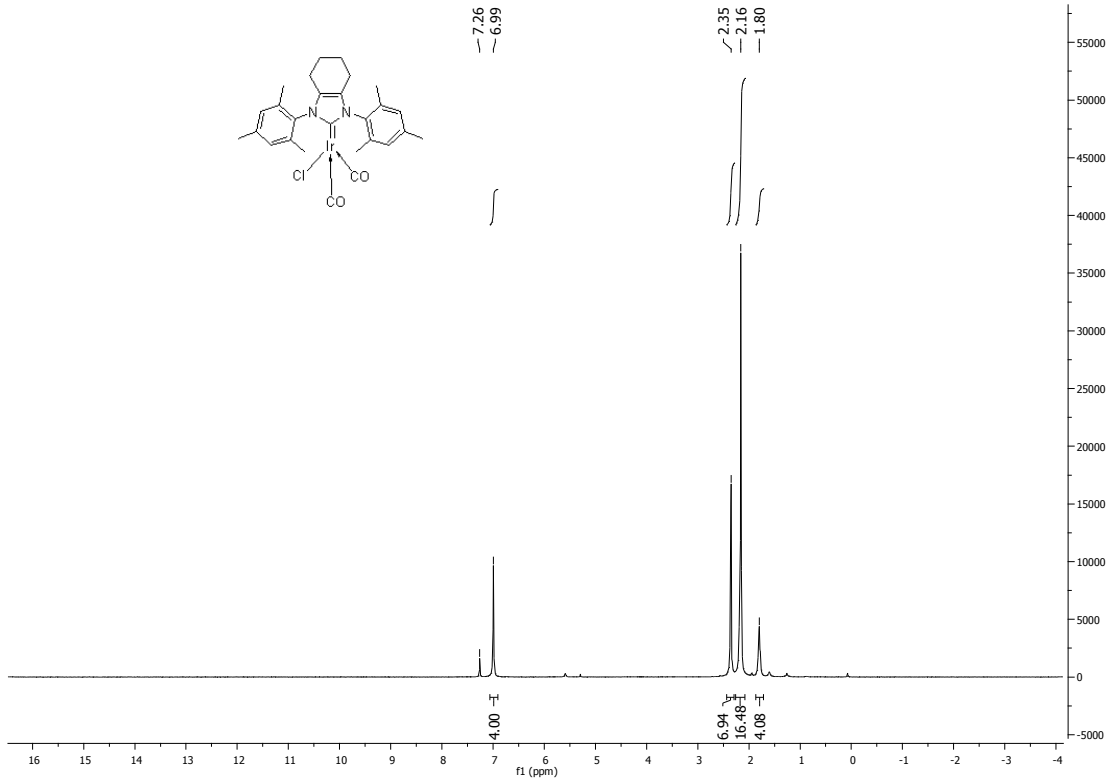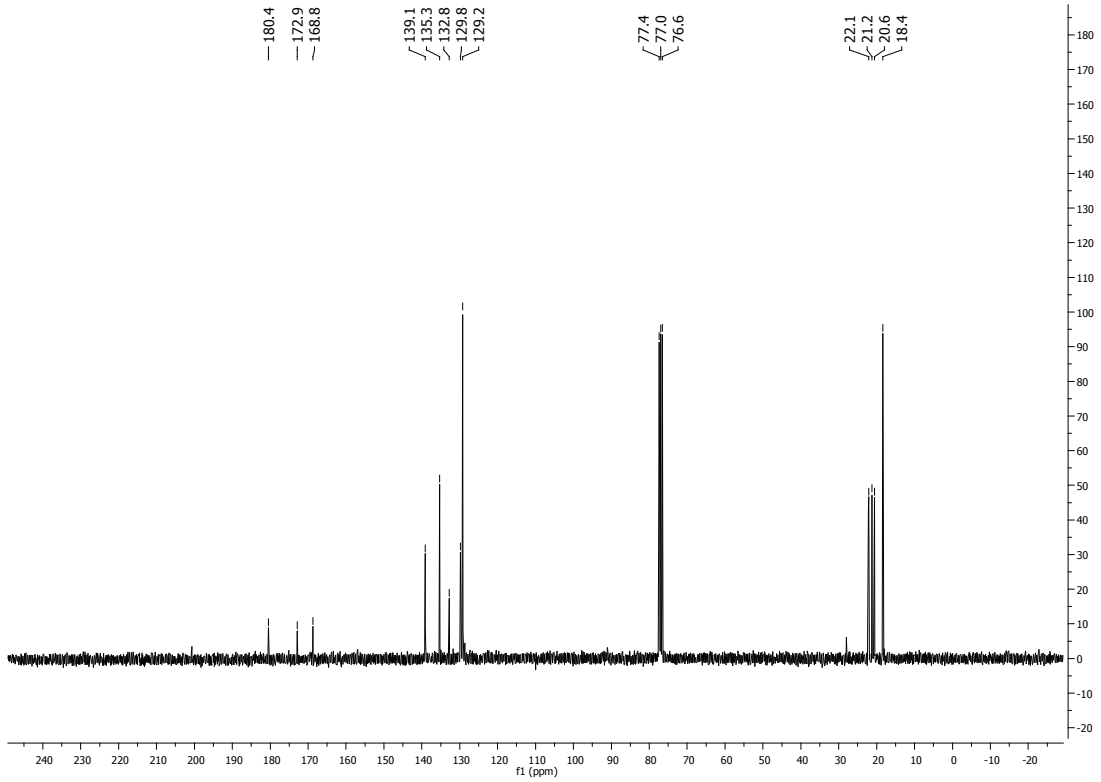

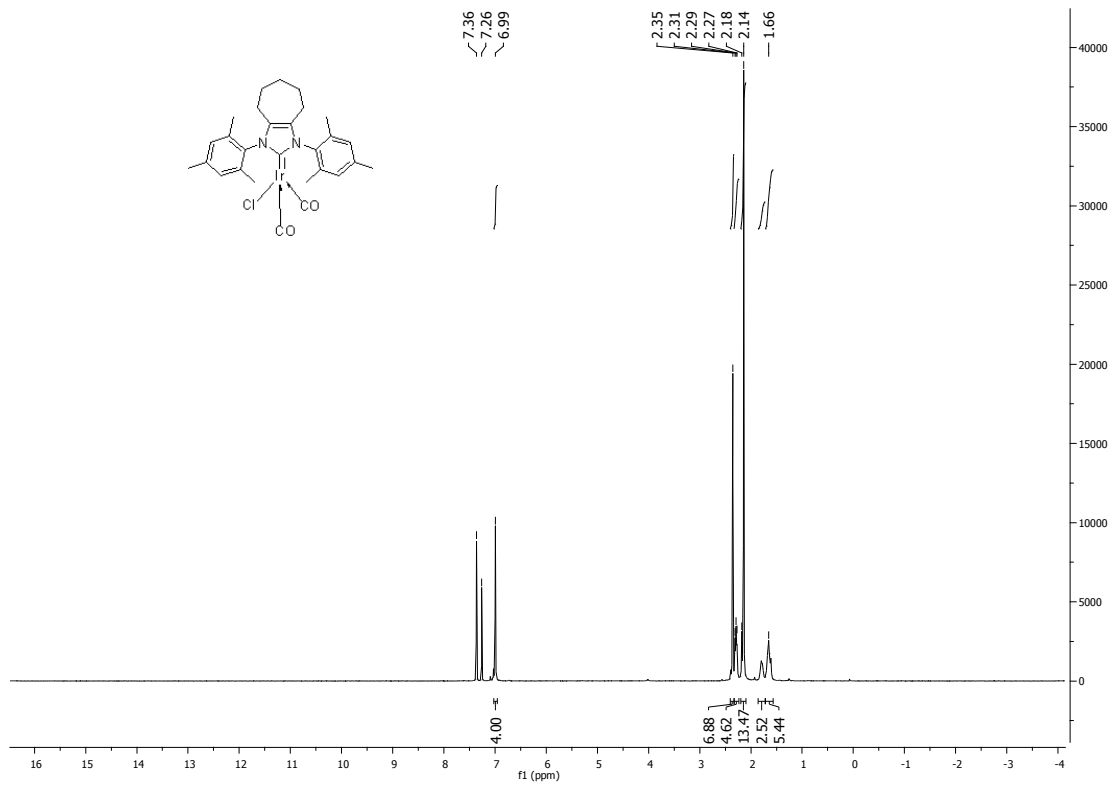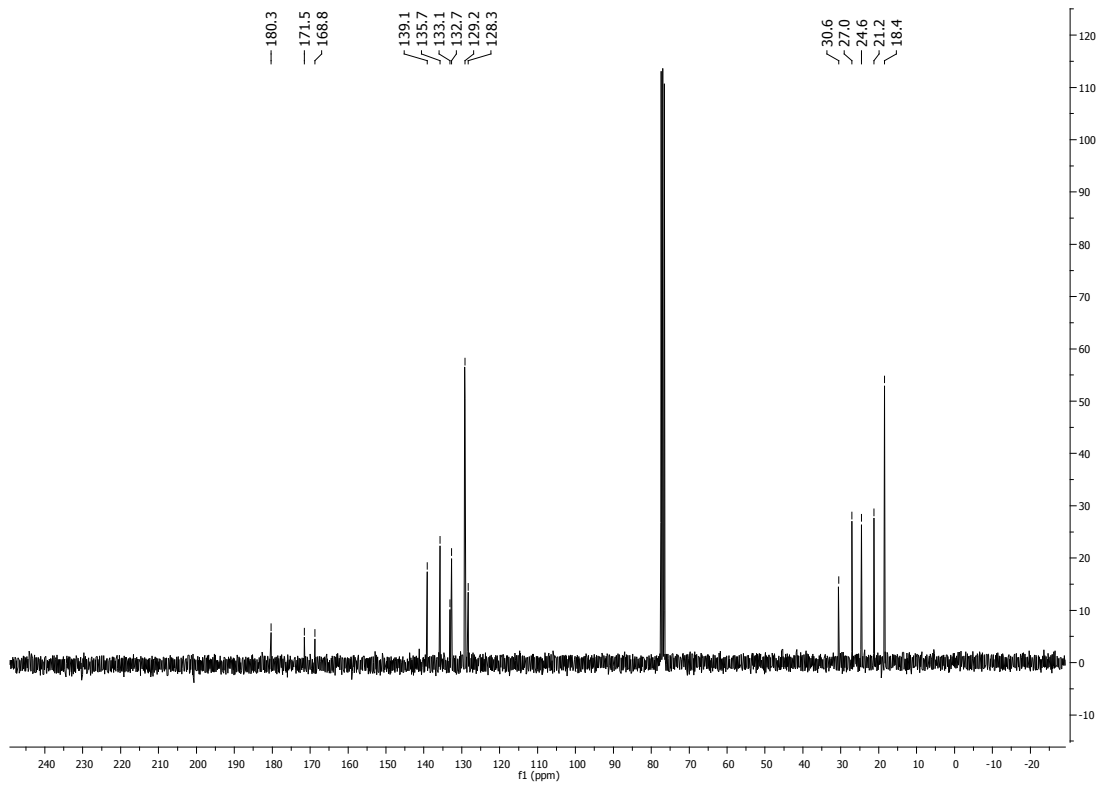

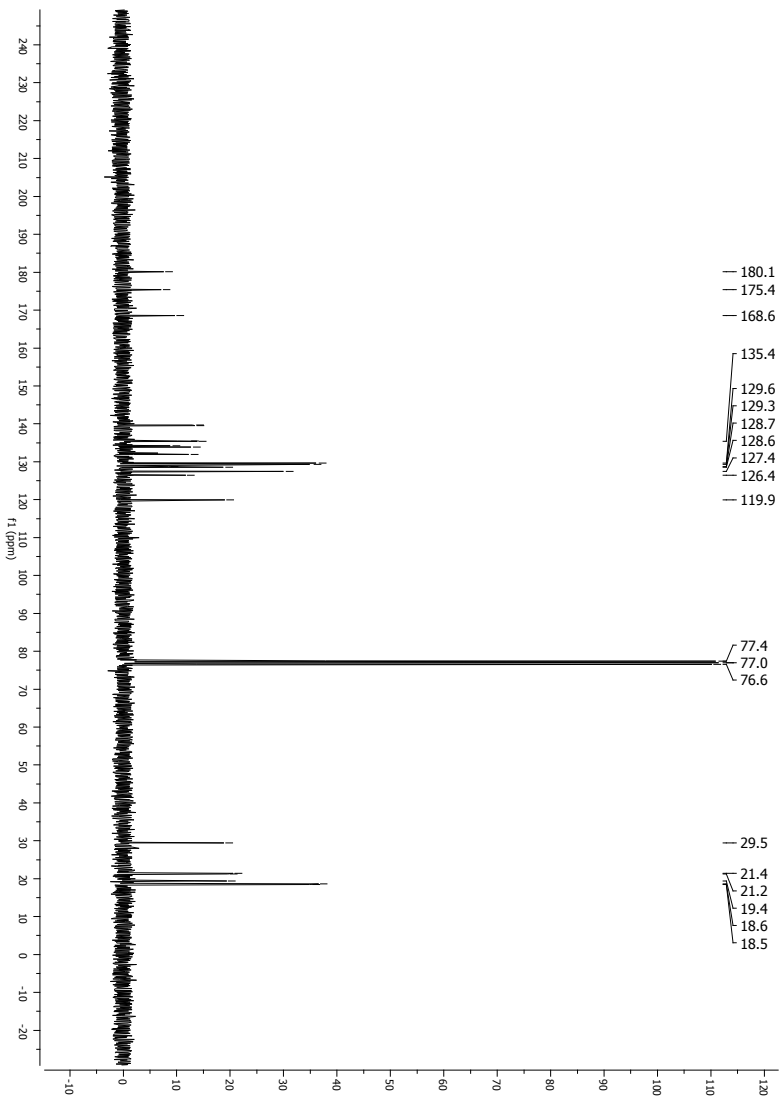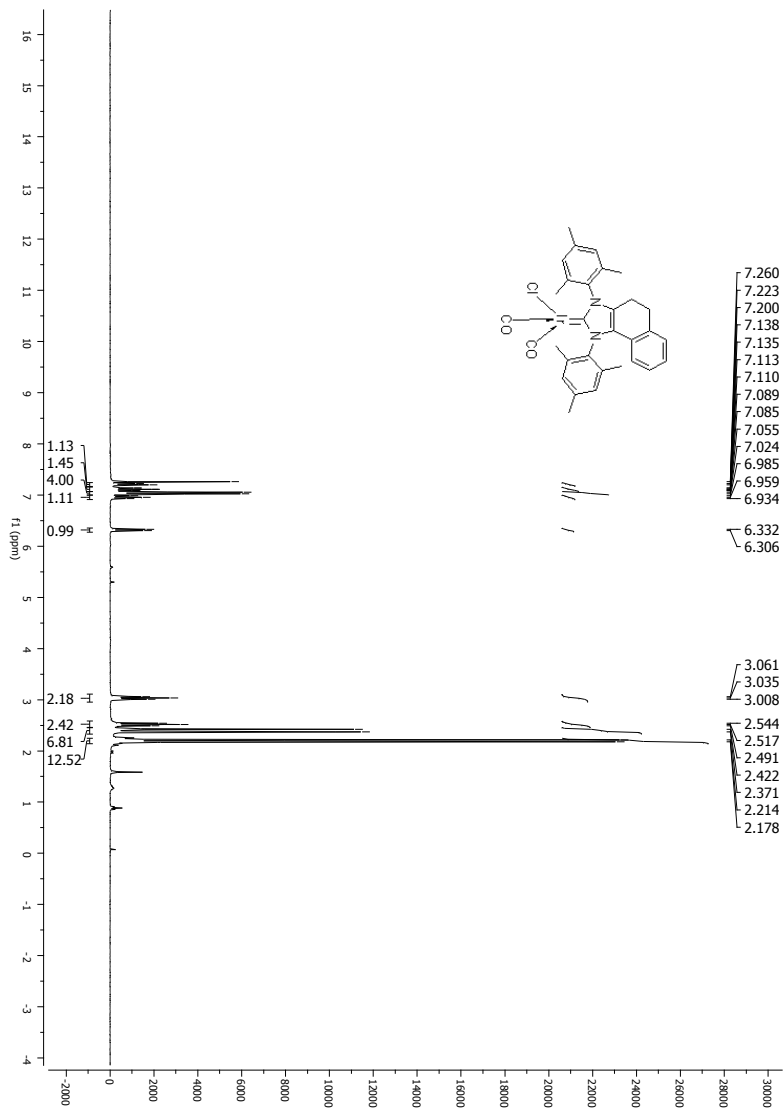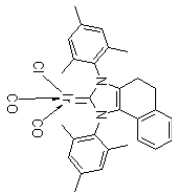

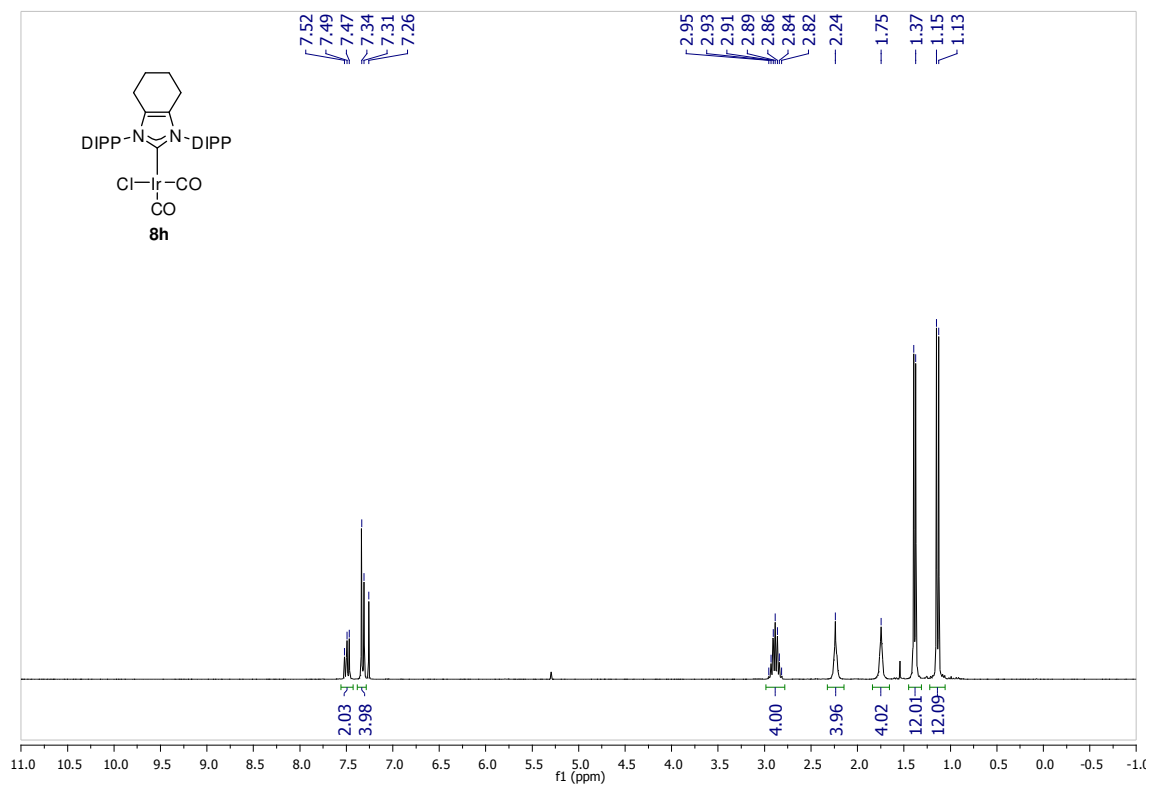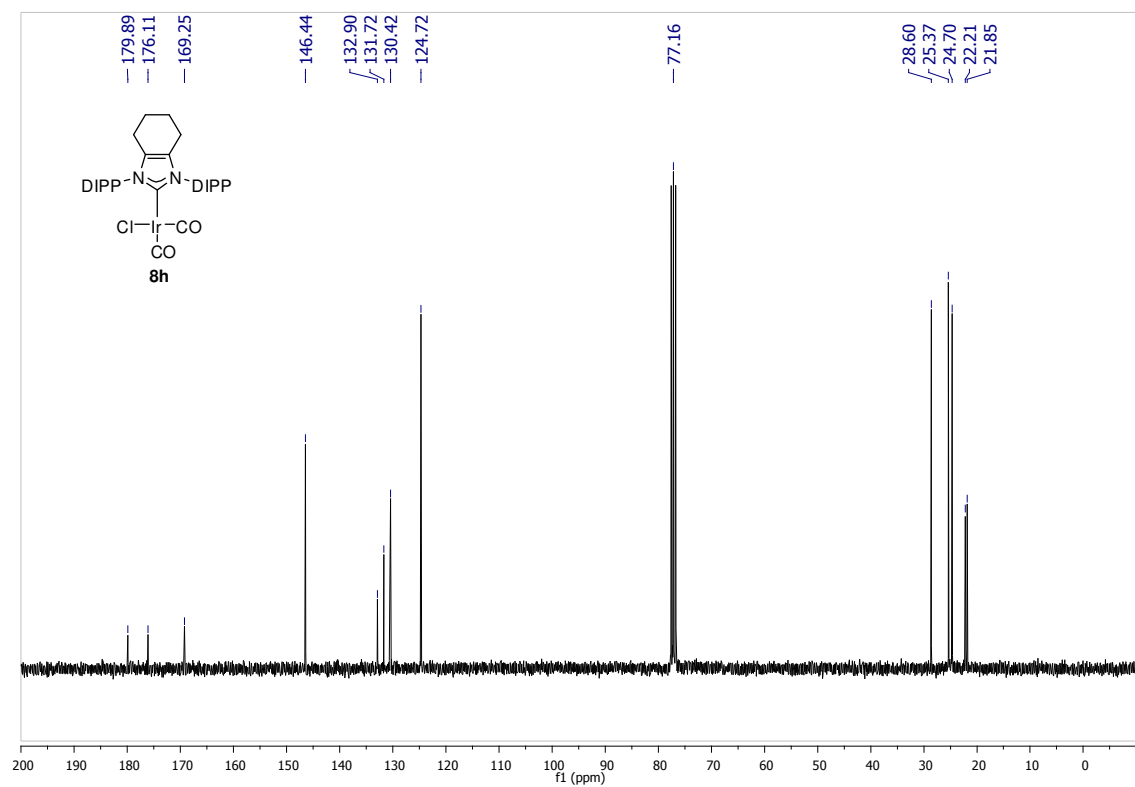

Supplement: b908981k1.pdf [file b908981k1.pdf]
